# Supplementary material for: Vitamin D repletion ameliorates adipose tissue browning and muscle wasting in infantile nephropathic cystinosis‐associated cachexia
Source: PubMed Central journal article supplement — J Cachexia Sarcopenia Muscle. 2019 Nov 13;11(1):120–34. doi: 10.1002/jcsm.12497 (PMC7015252; doi:10.1002/jcsm.12497), 2019-11-13

Supplemental Table 1S: Immunoassay information for serum chemistry, adipose and muscle tissue homogenate assay analysis.

Serum chemistry

25-Hydroxy Vitamin D, RIA  
 1,25-Dihydroxy Vitamin D, EIA  
 Mouse PTH 1-84 ELISA Kit

Assay information

IDS, AC-35F1  
 IDS, AC-62F1  
 Immutopics, 60-2305

Muscle and adipose tissue homogenate assay

ATP Assay Kit (colorimetric/Fluorometric)  
 Mouse CD137 (TNFRSF9) ELISA kit  
 Mouse COX2 ELISA kit  
 Mouse IKK-alpha (phospho-Thr23) ELISA kit  
 Mouse IL-1 beta ELISA kit  
 Mouse IL-6 ELISA Kit  
 Mouse MYD88 ELISA kit  
 Mouse NFkB p50 (phospho-Ser337) ELISA kit  
 Mouse total NFkB p50 ELISA kit  
 Mouse NFkB p65 (phospho-Ser536) ELISA kit  
 Mouse total NFkB p65 ELISA kit  
 Mouse Prostaglandin F2 alpha ELISA kit  
 Mouse TBX1 ELISA kit  
 Mouse TLR2 ELISA kit  
 Mouse TMEM26 ELISA kit  
 Mouse TNF-alpha ELISA Kit  
 Mouse TRAF6 ELISA kit  
 Mouse Ucp1 ELISA kits  
 Mouse Ucp2 ELISA kits  
 Mouse Ucp3 ELISA kits  
 Total Collagen Assay Kit

Assay information

Abcam, ab83355  
 LifeSpan BioSciences, LS-F2852-1  
 LifeSpan BioSciences, LS-F37124-1  
 LifeSpan BioSciences, LS-F1537-1  
 RayBiotech, ELM-IL1b-CL  
 RayBiotech, ELM-IL6  
 LifeSpan BioSciences, LS-F33219-1  
 Aviva Systems Biology, OKAG00322  
 Mybiosource, MBS031656  
 RayBiotech, PEL-NFKBP65-S536-T-1  
 RayBiotech, PEL-NFKBP65-S536-T-1  
 MyBioSource, MBS266867  
 Antibodies-online, ABIN6221756  
 Abcam, ab224880  
 MyBiosource, MBS9319338  
 RayBiotech, ELM-TNFa  
 LifeSpan BioSciences, LS-F53451  
 Aviva Systems Biology, OKCD02970  
 Aviva Systems Biology, OKEH05261  
 Aviva Systems Biology, OKEH05259  
 Abcam, ab222942

Supplemental Table 2S: PCR primer information.

| <u>Gene</u>              | <u>Forward primer sequence</u> | <u>Reverse primer sequence</u> |
|--------------------------|--------------------------------|--------------------------------|
| Atrogin-1                | CAGCTTCGTGAGCGACCTC            | GGCAGTCGAGAAGTCCAGTC           |
| CD137                    | CGTGCAGAACTCCTGTGATAAC         | GTCCACCTATGCTGGAGAAGG          |
| Cox2                     | AACCCAGGGGATCGAGTGT            | CGCAGCTCAGTGTTTGGGAT           |
| Igf1                     | GTGGGGGCTCGTGTTCCTC            | GATCACCGTGCAGTTTTCCA           |
| Murf-1                   | GTGTGAGGTGCCTACTTGCTC          | GCTCAGTCTTCTGTCCTTGGA          |
| MyD88                    | TCATGTTCTCCATACCCTTGGT         | AAACTGCGAGTGGGGTCAG            |
| MyoD                     | CCACTCCGGGACATAGACTTG          | AAAAGCGCAGGTCTGGTGAG           |
| Myostatin                | AGTGGATCTAAATGAGGGCAGT         | GTTTCCAGGCGCAGCTTAC            |
| Pax7                     | TCTCCAAGATTCTGTGCCGAT          | CGGGGTTCTCTCTTATACTCC          |
| PGF2 $\alpha$ synthase   | TGGTGTGCTGCGAGTGATG            | CAGGTACCAAGGCTGGATGTG          |
| Tbx1                     | CTGTGGGACGAGTTCAATCAG          | TTGTCATCTACGGGCACAAAG          |
| Tmem26                   | TTCCTGTTGCATTCCCTGGTC          | GCCGGAGAAAGCCATTTGT            |
| Tlr2                     | GCAAACGCTGTTCTGCTCAG           | AGGCGTCTCCCTCTATTGTATT         |
| Traf6                    | AAAGCGAGAGATTCTTCCCTG          | ACTGGGGACAATTCAGTAGAGC         |
| Gapdh (internal control) | AGGTCGGTGTGAACGGATTTG          | TGTAGACCATGTAGTTGAGGTCA        |

Supplemental Table 3S: Serum and blood chemistry of mice. Twelve-month-old, male, wild type (WT) and *Ctns*<sup>-/-</sup> mice were treated with 25(OH)D<sub>3</sub> (75 µg/kg per day) or 1,25(OH)<sub>2</sub>D<sub>3</sub> (60 ng/kg per day) versus ethylene glycol as vehicle for 6 weeks. Six groups of mice were included: WT+Vehicle, WT+25(OH)D<sub>3</sub>, WT++1,25(OH)<sub>2</sub>D<sub>3</sub>, *Ctns*<sup>-/-</sup>+Vehicle, *Ctns*<sup>-/-</sup>+25(OH)D<sub>3</sub>, *Ctns*<sup>-/-</sup>+1,25(OH)<sub>2</sub>D<sub>3</sub>. All mice were fed *ad libitum*. Data are expressed as mean SEM. <sup>A</sup>p<0.05, significantly higher in *Ctns*<sup>-/-</sup>+Vehicle, *Ctns*<sup>-/-</sup>+25(OH)D<sub>3</sub> or *Ctns*<sup>-/-</sup>+1,25(OH)<sub>2</sub>D<sub>3</sub> versus WT+Vehicle, WT+25(OH)D<sub>3</sub> or WT+1,25(OH)<sub>2</sub>D<sub>3</sub>, respectively. <sup>B</sup>p<0.05, significantly lower in *Ctns*<sup>-/-</sup>+Vehicle, *Ctns*<sup>-/-</sup>+25(OH)D<sub>3</sub> or *Ctns*<sup>-/-</sup>+1,25(OH)<sub>2</sub>D<sub>3</sub> versus WT+Vehicle, WT+25(OH)D<sub>3</sub> or WT+1,25(OH)<sub>2</sub>D<sub>3</sub>, respectively. <sup>C</sup>p<0.05, significantly difference between *Ctns*<sup>-/-</sup>+25(OH)D<sub>3</sub> versus *Ctns*<sup>-/-</sup>+Vehicle or *Ctns*<sup>-/-</sup>+1,25(OH)<sub>2</sub>D<sub>3</sub> versus *Ctns*<sup>-/-</sup>+Vehicle.

|                                              | WT<br>+ Vehicle<br>n = 8 |        | WT<br>+ 25(OH)D <sub>3</sub><br>n = 8 |        | WT<br>+ 1,25(OH) <sub>2</sub> D <sub>3</sub><br>n = 8 |        | <i>Ctns</i> <sup>-/-</sup><br>+ Vehicle<br>n = 8 |                     | <i>Ctns</i> <sup>-/-</sup><br>+ 25(OH)D <sub>3</sub><br>n = 8 |                       | <i>Ctns</i> <sup>-/-</sup><br>+ 1,25(OH) <sub>2</sub> D <sub>3</sub><br>n = 8 |                     |
|----------------------------------------------|--------------------------|--------|---------------------------------------|--------|-------------------------------------------------------|--------|--------------------------------------------------|---------------------|---------------------------------------------------------------|-----------------------|-------------------------------------------------------------------------------|---------------------|
| BUN (mg/dL)                                  | 32.4                     | ± 5.5  | 35.6                                  | ± 6.2  | 37.5                                                  | ± 4.5  | 79.6                                             | ± 14.6 <sup>A</sup> | 73.2                                                          | ± 12.2 <sup>A</sup>   | 71.3                                                                          | ± 13.7 <sup>A</sup> |
| Creatinine (mg/dL)                           | < 0.2                    |        | < 0.2                                 |        | < 0.2                                                 |        | 0.7                                              | ± 0.2 <sup>A</sup>  | 0.5                                                           | ± 0.2 <sup>A</sup>    | 0.9                                                                           | ± 0.3 <sup>A</sup>  |
| Bicarbonate (mmol/L)                         | 27.8                     | ± 1.1  | 27.3                                  | ± 0.6  | 26.9                                                  | ± 0.8  | 26.8                                             | ± 1.1               | 27.6                                                          | ± 1.2                 | 27.6                                                                          | ± 2.1               |
| 25(OH)D <sub>3</sub> (ng/mL)                 | 113.2                    | ± 12.3 | 128.3                                 | ± 21.3 | 109.3                                                 | ± 18.3 | 43.5                                             | ± 15.4 <sup>B</sup> | 108.4                                                         | ± 18.4 <sup>C</sup>   | 58.4                                                                          | ± 9.8 <sup>B</sup>  |
| 1,25(OH) <sub>2</sub> D <sub>3</sub> (pg/mL) | 298.4                    | ± 23.4 | 289.4                                 | ± 26.5 | 301.5                                                 | ± 32.5 | 105.6                                            | ± 24.8 <sup>B</sup> | 185.6                                                         | ± 25.3 <sup>B,C</sup> | 287.4                                                                         | ± 26.1 <sup>C</sup> |

Supplemental Table 4S: List of differential expressed genes in gastrocnemius muscle from Ctns<sup>-/-</sup>+Vehicle versus WT+Vehicle mice

| Gene ID   | Expression (WT + Vehicle) | Expression (Ctns <sup>-/-</sup> + Vehicle) | log2 Fold Change (Ctns <sup>-/-</sup> + Vehicle / WT + Vehicle) | P - adjusted | Up/Down-Regulation | P value   | Symbol        | Description                                                                   |
|-----------|---------------------------|--------------------------------------------|-----------------------------------------------------------------|--------------|--------------------|-----------|---------------|-------------------------------------------------------------------------------|
| 17167     | 2.78                      | 40.63                                      | 3.87                                                            | 1.46E-15     | Up                 | 1.12E-17  | Marco         | macrophage receptor with collagenous structure                                |
| 12518     | 4.76                      | 65.27                                      | 3.78                                                            | 2.73E-20     | Up                 | 1.59E-22  | Cd79a         | CD79A antigen (immunoglobulin-associated alpha)                               |
| 12482     | 2.42                      | 31.37                                      | 3.70                                                            | 5.09E-13     | Up                 | 4.96E-15  | Ms4a1         | membrane-spanning 4-domains, subfamily A, member 1                            |
| 69169     | 2.40                      | 29.97                                      | 3.64                                                            | 1.55E-12     | Up                 | 1.55E-14  | Faim3         | Fas apoptotic inhibitory molecule 3                                           |
| 12483     | 4.40                      | 42.36                                      | 3.27                                                            | 7.07E-13     | Up                 | 6.93E-15  | Cd22          | CD22 antigen                                                                  |
| 16994     | 3.92                      | 37.00                                      | 3.24                                                            | 2.66E-12     | Up                 | 2.68E-14  | Ltb           | lymphotoxin B                                                                 |
| 208154    | 2.26                      | 20.99                                      | 3.22                                                            | 3.43E-09     | Up                 | 4.60E-11  | Btla          | B and T lymphocyte associated                                                 |
| 12478     | 3.55                      | 30.15                                      | 3.09                                                            | 2.55E-10     | Up                 | 3.01E-12  | Cd19          | CD19 antigen                                                                  |
| 14128     | 4.23                      | 35.53                                      | 3.07                                                            | 3.15E-11     | Up                 | 3.42E-13  | Fcer2a        | Fc receptor, IgE, low affinity II, alpha polypeptide                          |
| 12902     | 2.54                      | 20.99                                      | 3.05                                                            | 1.48E-08     | Up                 | 2.21E-10  | Cr2           | complement receptor 2                                                         |
| 108956    | 2.57                      | 21.17                                      | 3.04                                                            | 1.77E-08     | Up                 | 2.68E-10  | Apol7c        | apolipoprotein L 7c                                                           |
| 100048884 | 2.21                      | 18.13                                      | 3.03                                                            | 5.34E-08     | Up                 | 8.57E-10  | LOC100048884  | novel member of the major urinary protein (Mup) gene family                   |
| 20299     | 3.19                      | 25.90                                      | 3.02                                                            | 2.87E-09     | Up                 | 3.75E-11  | Ccl22         | chemokine (C-C motif) ligand 22                                               |
| 83408     | 5.82                      | 45.36                                      | 2.96                                                            | 1.13E-12     | Up                 | 1.11E-14  | Gimap3        | GTPase, IMAP family member 3                                                  |
| 16818     | 2.88                      | 21.63                                      | 2.91                                                            | 5.22E-08     | Up                 | 8.36E-10  | Lck           | lymphocyte protein tyrosine kinase                                            |
| 15985     | 4.80                      | 34.82                                      | 2.86                                                            | 3.22E-10     | Up                 | 3.81E-12  | Cd79b         | CD79B antigen                                                                 |
| 272382    | 3.49                      | 25.03                                      | 2.84                                                            | 2.38E-08     | Up                 | 3.65E-10  | SpiB          | Spi-B transcription factor (Spi-1/PU.1 related)                               |
| 20343     | 6.04                      | 41.00                                      | 2.76                                                            | 4.41E-11     | Up                 | 4.81E-13  | Sell          | selectin, lymphocyte                                                          |
| 54352     | 11.90                     | 79.59                                      | 2.74                                                            | 2.44E-18     | Up                 | 1.54E-20  | Irx5          | Iroquois related homeobox 5 (Drosophila)                                      |
| 60361     | 2.12                      | 13.78                                      | 2.70                                                            | 4.39E-06     | Up                 | 9.19E-08  | Ms4a4b        | membrane-spanning 4-domains, subfamily A, member 4B                           |
| 211623    | 4.62                      | 28.81                                      | 2.64                                                            | 1.34E-07     | Up                 | 2.31E-09  | Plac9a        | placenta specific 9a                                                          |
| 15002     | 4.74                      | 28.67                                      | 2.60                                                            | 6.75E-08     | Up                 | 1.11E-09  | H2-Ob         | histocompatibility 2, O region beta locus                                     |
| 243958    | 2.76                      | 16.47                                      | 2.58                                                            | 5.61E-06     | Up                 | 1.22E-07  | Siglecg       | sialic acid binding Ig-like lectin G                                          |
| 12525     | 3.12                      | 18.28                                      | 2.55                                                            | 4.53E-06     | Up                 | 9.54E-08  | Cd8a          | CD8 antigen, alpha chain                                                      |
| 320484    | 4.68                      | 27.38                                      | 2.55                                                            | 1.14E-07     | Up                 | 1.93E-09  | Rasal3        | RAS protein activator like 3                                                  |
| 17068     | 2.66                      | 15.07                                      | 2.50                                                            | 1.30E-05     | Up                 | 3.04E-07  | Ly6d          | lymphocyte antigen 6 complex, locus D                                         |
| 23833     | 10.80                     | 60.32                                      | 2.48                                                            | 4.31E-13     | Up                 | 4.18E-15  | Cd52          | CD52 antigen                                                                  |
| 55985     | 6.64                      | 35.72                                      | 2.43                                                            | 2.56E-08     | Up                 | 3.94E-10  | Cxcl13        | chemokine (C-X-C motif) ligand 13                                             |
| 21952     | 110.93                    | 596.38                                     | 2.43                                                            | 1.96E-103    | Up                 | 1.83E-106 | Tnni1         | troponin I, skeletal, slow 1                                                  |
| 19354     | 16.29                     | 86.86                                      | 2.41                                                            | 2.81E-17     | Up                 | 1.92E-19  | Rac2          | RAS-related C3 botulinum substrate 2                                          |
| 16428     | 2.32                      | 12.34                                      | 2.41                                                            | 6.06E-05     | Up                 | 1.64E-06  | Itk           | IL2 inducible T cell kinase                                                   |
| 13009     | 96.76                     | 513.96                                     | 2.41                                                            | 9.82E-88     | Up                 | 1.32E-90  | Csrp3         | cysteine and glycine-rich protein 3                                           |
| 381835    | 4.30                      | 22.68                                      | 2.40                                                            | 2.65E-06     | Up                 | 5.33E-08  | Gm1078        | predicted gene 1078                                                           |
| 216859    | 4.72                      | 24.62                                      | 2.38                                                            | 2.56E-06     | Up                 | 5.14E-08  | Acap1         | ArfGAP with coiled-coil, ankyrin repeat and PH domains 1                      |
| 22780     | 4.07                      | 21.14                                      | 2.38                                                            | 8.44E-06     | Up                 | 1.89E-07  | Ikzf3         | IKAROS family zinc finger 3                                                   |
| 21955     | 315.32                    | 1628.27                                    | 2.37                                                            | 3.13E-240    | Up                 | 7.32E-244 | Tnnt1         | troponin T1, skeletal, slow                                                   |
| 15430     | 13.74                     | 70.40                                      | 2.36                                                            | 2.11E-13     | Up                 | 2.01E-15  | Hoxd10        | homeobox D10                                                                  |
| 16197     | 4.24                      | 21.70                                      | 2.36                                                            | 4.55E-06     | Up                 | 9.69E-08  | Il7r          | interleukin 7 receptor                                                        |
| 170942    | 51.00                     | 259.37                                     | 2.35                                                            | 5.06E-45     | Up                 | 1.54E-47  | Erd1          | erythroid differentiation regulator 1                                         |
| 12504     | 4.57                      | 22.88                                      | 2.32                                                            | 4.39E-06     | Up                 | 9.22E-08  | Cd4           | CD4 antigen                                                                   |
| 98752     | 1.60                      | 7.85                                       | 2.30                                                            | 0.000318645  | Up                 | 1.03E-05  | Fcrla         | Fc receptor-like A                                                            |
| 791403    | 15.59                     | 76.03                                      | 2.29                                                            | 1.80E-14     | Up                 | 1.55E-16  | D830015G02Rik | RIKEN cDNA D830015G02 gene                                                    |
| 72049     | 2.30                      | 11.17                                      | 2.28                                                            | 0.000222183  | Up                 | 6.98E-06  | Tnfrsf13c     | tumor necrosis factor receptor superfamily, member 13c                        |
| 21924     | 194.43                    | 939.95                                     | 2.27                                                            | 1.06E-149    | Up                 | 6.17E-153 | Tnnc1         | troponin C, cardiac/slow skeletal                                             |
| 60504     | 2.92                      | 13.90                                      | 2.25                                                            | 0.000129905  | Up                 | 3.82E-06  | Il21r         | interleukin 21 receptor                                                       |
| 140781    | 1396.81                   | 6539.09                                    | 2.23                                                            | 0            | Up                 | 0         | Myh7          | myosin, heavy polypeptide 7, cardiac muscle, beta                             |
| 15000     | 2.27                      | 10.51                                      | 2.21                                                            | 0.000415685  | Up                 | 1.40E-05  | H2-DMb2       | histocompatibility 2, class II, locus Mb2                                     |
| 18985     | 2.63                      | 12.08                                      | 2.20                                                            | 0.00036109   | Up                 | 1.19E-05  | Pou2af1       | POU domain, class 2, associating factor 1                                     |
| 18507     | 1.58                      | 7.19                                       | 2.18                                                            | 0.000768127  | Up                 | 2.82E-05  | Pax5          | paired box gene 5                                                             |
| 13507     | 1.58                      | 7.13                                       | 2.17                                                            | 0.000839553  | Up                 | 3.14E-05  | Dsc3          | desmocollin 3                                                                 |
| 12143     | 2.54                      | 11.36                                      | 2.16                                                            | 0.000450703  | Up                 | 1.55E-05  | Blk           | B lymphoid kinase                                                             |
| 19265     | 3.52                      | 15.56                                      | 2.14                                                            | 0.000172816  | Up                 | 5.27E-06  | Ptpncap       | protein tyrosine phosphatase, receptor type, C polypeptide-associated protein |
| 12775     | 4.18                      | 18.18                                      | 2.12                                                            | 0.000110252  | Up                 | 3.18E-06  | Ccr7          | chemokine (C-C motif) receptor 7                                              |
| 29813     | 92.89                     | 390.94                                     | 2.07                                                            | 4.41E-53     | Up                 | 1.11E-55  | Zfp385a       | zinc finger protein 385A                                                      |
| 16797     | 2.15                      | 8.91                                       | 2.05                                                            | 0.001612755  | Up                 | 6.51E-05  | Lat           | linker for activation of T cells                                              |
| 16069     | 5.80                      | 23.87                                      | 2.04                                                            | 4.37E-05     | Up                 | 1.15E-06  | Igj           | immunoglobulin joining chain                                                  |
| 74734     | 2.18                      | 8.91                                       | 2.03                                                            | 0.001850485  | Up                 | 7.56E-05  | Rhoh          | ras homolog gene family, member H                                             |

|           |         |          |      |             |    |             |               |                                                                                    |
|-----------|---------|----------|------|-------------|----|-------------|---------------|------------------------------------------------------------------------------------|
| 229499    | 1.80    | 7.32     | 2.02 | 0.002366746 | Up | 0.000100427 | Fcrl1         | Fc receptor-like 1                                                                 |
| 17906     | 438.75  | 1750.73  | 2.00 | 2.25E-215   | Up | 9.20E-219   | Myl2          | myosin, light polypeptide 2, regulatory, cardiac, slow                             |
| 20849     | 2.44    | 9.67     | 1.99 | 0.002033903 | Up | 8.40E-05    | Stat4         | signal transducer and activator of transcription 4                                 |
| 237256    | 1.79    | 7.08     | 1.98 | 0.003112721 | Up | 0.000138985 | Zc3h12d       | zinc finger CCCH type containing 12D                                               |
| 100041546 | 1.80    | 7.02     | 1.96 | 0.00353099  | Up | 0.00016302  | Ly6c2         | lymphocyte antigen 6 complex, locus C2                                             |
| 19419     | 3.93    | 15.24    | 1.96 | 0.001011598 | Up | 3.89E-05    | Rasgrp1       | RAS guanyl releasing protein 1                                                     |
| 12145     | 4.46    | 17.02    | 1.93 | 0.000625212 | Up | 2.22E-05    | Cxcr5         | chemokine (C-X-C motif) receptor 5                                                 |
| 666661    | 1.45    | 5.53     | 1.93 | 0.004309114 | Up | 0.000206741 | Gm8221        | apolipoprotein L 7c pseudogene                                                     |
| 15438     | 58.26   | 221.67   | 1.93 | 1.47E-30    | Up | 5.47E-33    | Hoxd9         | homeobox D9                                                                        |
| 14025     | 2.07    | 7.71     | 1.90 | 0.004876567 | Up | 0.000236528 | Bcl11a        | B cell CLL/lymphoma 11A (zinc finger protein)                                      |
| 12502     | 1.77    | 6.56     | 1.89 | 0.005776509 | Up | 0.000289618 | Cd3g          | CD3 antigen, gamma polypeptide                                                     |
| 21414     | 9.97    | 36.79    | 1.88 | 4.60E-06    | Up | 9.85E-08    | Tcf7          | transcription factor 7, T cell specific                                            |
| 20307     | 5.03    | 18.49    | 1.88 | 0.000531244 | Up | 1.86E-05    | Ccl8          | chemokine (C-C motif) ligand 8                                                     |
| 276891    | 6.33    | 22.87    | 1.85 | 0.000211951 | Up | 6.61E-06    | Timd4         | T cell immunoglobulin and mucin domain containing 4                                |
| 100503872 | 5.07    | 18.13    | 1.84 | 0.00105291  | Up | 4.07E-05    | Hotair        | HOX transcript antisense RNA (non-protein coding)                                  |
| 16408     | 10.87   | 38.76    | 1.83 | 4.84E-06    | Up | 1.04E-07    | Ilgal         | integrin alpha L                                                                   |
| 74131     | 8.27    | 29.41    | 1.83 | 4.84E-05    | Up | 1.29E-06    | Sash3         | SAM and SH3 domain containing 3                                                    |
| 14421     | 13.08   | 46.21    | 1.82 | 3.90E-07    | Up | 6.99E-09    | B4galnt1      | beta-1,4-N-acetyl-galactosaminyl transferase 1                                     |
| 14663     | 1.38    | 4.89     | 1.82 | 0.008409241 | Up | 0.0004545   | Glycam1       | glycosylation dependent cell adhesion molecule 1                                   |
| 381091    | 2.03    | 7.16     | 1.82 | 0.008191077 | Up | 0.000438885 | H2-Eb2        | histocompatibility 2, class II antigen E beta2                                     |
| 12721     | 31.29   | 110.28   | 1.82 | 9.87E-14    | Up | 8.87E-16    | Coro1a        | coronin, actin binding protein 1A                                                  |
| 64380     | 1.73    | 6.07     | 1.81 | 0.009317683 | Up | 0.000511757 | Ms4a4c        | membrane-spanning 4-domains, subfamily A, member 4C                                |
| 19264     | 29.97   | 103.03   | 1.78 | 1.76E-13    | Up | 1.65E-15    | Ptprc         | protein tyrosine phosphatase, receptor type, C                                     |
| 66949     | 3.09    | 10.47    | 1.76 | 0.00780272  | Up | 0.000414433 | Trim59        | tripartite motif-containing 59                                                     |
| 110168    | 2.01    | 6.79     | 1.75 | 0.012377034 | Up | 0.000720242 | Gpr18         | G protein-coupled receptor 18                                                      |
| 20304     | 3.77    | 12.72    | 1.75 | 0.005961301 | Up | 0.000301666 | Ccl5          | chemokine (C-C motif) ligand 5                                                     |
| 18784     | 23.79   | 79.82    | 1.75 | 2.20E-10    | Up | 2.58E-12    | Pla2g5        | phospholipase A2, group V                                                          |
| 56696     | 4.30    | 14.30    | 1.73 | 0.003789593 | Up | 0.000176728 | Gpr132        | G protein-coupled receptor 132                                                     |
| 100039008 | 7.58    | 25.00    | 1.72 | 0.00042202  | Up | 1.43E-05    | Mup10         | major urinary protein 10                                                           |
| 12481     | 4.91    | 15.95    | 1.70 | 0.003152275 | Up | 0.000140985 | Cd2           | CD2 antigen                                                                        |
| 12507     | 2.37    | 7.70     | 1.70 | 0.016196104 | Up | 0.000985965 | Cd5           | CD5 antigen                                                                        |
| 16182     | 2.66    | 8.60     | 1.70 | 0.014034701 | Up | 0.000831449 | Il18r1        | interleukin 18 receptor 1                                                          |
| 20715     | 2.34    | 7.57     | 1.70 | 0.016220325 | Up | 0.000989962 | Serpina3g     | serine (or cysteine) peptidase inhibitor, clade A, member 3G                       |
| 15437     | 94.00   | 301.37   | 1.68 | 1.53E-34    | Up | 5.27E-37    | Hoxd8         | homeobox D8                                                                        |
| 12493     | 12.05   | 38.33    | 1.67 | 2.03E-05    | Up | 4.97E-07    | Cd37          | CD37 antigen                                                                       |
| 78826     | 4.01    | 12.64    | 1.66 | 0.009670795 | Up | 0.000540747 | P2ry10        | purinergic receptor P2Y, G-protein coupled 10                                      |
| 16364     | 13.02   | 41.01    | 1.66 | 1.61E-05    | Up | 3.82E-07    | Irf4          | interferon regulatory factor 4                                                     |
| 246177    | 10.80   | 33.96    | 1.65 | 9.49E-05    | Up | 2.69E-06    | Myo1g         | myosin IG                                                                          |
| 215243    | 5.56    | 17.48    | 1.65 | 0.003248655 | Up | 0.00014714  | Traf3ip3      | TRAF3 interacting protein 3                                                        |
| 239790    | 203.38  | 639.14   | 1.65 | 6.09E-67    | Up | 1.07E-69    | Ostn          | osteonectin                                                                        |
| 14357     | 5.60    | 17.60    | 1.65 | 0.003501517 | Up | 0.000161046 | Dtx1          | deltex 1 homolog (Drosophila)                                                      |
| 22778     | 12.72   | 39.94    | 1.65 | 2.33E-05    | Up | 5.74E-07    | Ikzf1         | IKAROS family zinc finger 1                                                        |
| 66755     | 9.50    | 29.70    | 1.65 | 0.000276626 | Up | 8.80E-06    | 4933415F23Rik | RIKEN cDNA 4933415F23 gene                                                         |
| 59069     | 637.59  | 1985.52  | 1.64 | 1.08E-183   | Up | 5.06E-187   | Tpm3          | tropomyosin 3, gamma                                                               |
| 27273     | 3402.34 | 10583.66 | 1.64 | 0           | Up | 0           | Pdk4          | pyruvate dehydrogenase kinase, isoenzyme 4                                         |
| 74015     | 2.98    | 9.26     | 1.63 | 0.018525938 | Up | 0.001168887 | Fcho1         | FCH domain only 1                                                                  |
| 20672     | 58.06   | 179.45   | 1.63 | 3.07E-19    | Up | 1.88E-21    | Sox18         | SRY-box containing gene 18                                                         |
| 207839    | 3.23    | 9.90     | 1.62 | 0.016967073 | Up | 0.001042802 | Galnt6        | UDP-N-acetyl-alpha-D-galactosamine:polypeptide N-acetylgalactosaminyltransferase 6 |
| 76074     | 1.27    | 3.88     | 1.61 | 0.024953785 | Up | 0.001693084 | Gbp8          | guanylate-binding protein 8                                                        |
| 70450     | 2.28    | 6.97     | 1.61 | 0.026346158 | Up | 0.001811462 | Unc13d        | unc-13 homolog D (C. elegans)                                                      |
| 213439    | 2.25    | 6.83     | 1.60 | 0.027779752 | Up | 0.001953809 | Gpr174        | G protein-coupled receptor 174                                                     |
| 15001     | 1.96    | 5.94     | 1.60 | 0.030084439 | Up | 0.002152777 | H2-Oa         | histocompatibility 2, O region alpha locus                                         |
| 234695    | 3.99    | 12.00    | 1.59 | 0.016220325 | Up | 0.00099028  | Rltpr         | RGD motif, leucine rich repeats, tropomodulin domain and proline-rich containing   |
| 15397     | 5.86    | 17.52    | 1.58 | 0.005906417 | Up | 0.000298506 | Hoxa11as      | HOXA11 antisense RNA (non-protein coding)                                          |
| 16842     | 3.28    | 9.75     | 1.57 | 0.023666061 | Up | 0.001578842 | Lef1          | lymphoid enhancer binding factor 1                                                 |
| 12500     | 1.36    | 4.03     | 1.57 | 0.029849568 | Up | 0.002132485 | Cd3d          | CD3 antigen, delta polypeptide                                                     |
| 17897     | 1042.26 | 3087.67  | 1.57 | 4.31E-218   | Up | 1.51E-221   | Myl3          | myosin, light polypeptide 3                                                        |
| 12802     | 3.26    | 9.49     | 1.54 | 0.028381393 | Up | 0.002009375 | Cnr2          | cannabinoid receptor 2 (macrophage)                                                |
| 227929    | 10.42   | 30.30    | 1.54 | 0.000683345 | Up | 2.48E-05    | Cytp          | cytohesin 1 interacting protein                                                    |
| 320495    | 2.23    | 6.47     | 1.54 | 0.039057882 | Up | 0.002969783 | Ipcef1        | interaction protein for cytohesin exchange factors 1                               |
| 240754    | 2.55    | 7.39     | 1.53 | 0.036905773 | Up | 0.002772295 | Lax1          | lymphocyte transmembrane adaptor 1                                                 |
| 70719     | 33.69   | 97.50    | 1.53 | 1.33E-09    | Up | 1.68E-11    | Hmha1         | histocompatibility (minor) HA-1                                                    |
| 20737     | 4.85    | 13.94    | 1.52 | 0.015210863 | Up | 0.000911782 | Spn           | sialophorin                                                                        |
| 328833    | 2.59    | 7.41     | 1.52 | 0.040572879 | Up | 0.003106964 | Trem2         | triggering receptor expressed on myeloid cells-like 2                              |
| 108105    | 2.84    | 8.03     | 1.50 | 0.038768094 | Up | 0.002939342 | B3gnt5        | UDP-GlcNAc:betaGal beta-1,3-N-acetylglucosaminyltransferase 5                      |

|        |         |         |      |             |    |             |               |                                                                                     |
|--------|---------|---------|------|-------------|----|-------------|---------------|-------------------------------------------------------------------------------------|
| 12614  | 2.53    | 7.10    | 1.49 | 0.046292391 | Up | 0.003636302 | Celsr1        | cadherin, EGF LAG seven-pass G-type receptor 1 (flamingo homolog, Drosophila)       |
| 320139 | 4.79    | 13.47   | 1.49 | 0.017864567 | Up | 0.001116731 | Ptpn7         | protein tyrosine phosphatase, non-receptor type 7                                   |
| 72891  | 1.27    | 3.56    | 1.49 | 0.044078445 | Up | 0.003432011 | Xlrc4         | X-linked lymphocyte-regulated 4C                                                    |
| 244233 | 1.18    | 3.31    | 1.49 | 0.045066499 | Up | 0.003522094 | Cd163l1       | CD163 molecule-like 1                                                               |
| 59006  | 317.70  | 886.13  | 1.48 | 1.41E-73    | Up | 2.38E-76    | Myoz2         | myozenin 2                                                                          |
| 268857 | 6.42    | 17.77   | 1.47 | 0.010693585 | Up | 0.000609172 | Nlrc3         | NLR family, CARD domain containing 3                                                |
| 11938  | 1526.67 | 4205.19 | 1.46 | 3.79E-269   | Up | 6.64E-273   | Atp2a2        | ATPase, Ca <sup>++</sup> transporting, cardiac muscle, slow twitch 2                |
| 16186  | 24.28   | 66.87   | 1.46 | 1.39E-06    | Up | 2.65E-08    | Il2rg         | interleukin 2 receptor, gamma chain                                                 |
| 11464  | 659.80  | 1805.17 | 1.45 | 8.85E-134   | Up | 5.68E-137   | Actc1         | actin, alpha, cardiac muscle 1                                                      |
| 20491  | 5.81    | 15.80   | 1.44 | 0.019095864 | Up | 0.001211534 | Sla           | src-like adaptor                                                                    |
| 224065 | 3.80    | 10.29   | 1.44 | 0.040717601 | Up | 0.0031228   | Uts2b         | urotensin 2B                                                                        |
| 215632 | 5.48    | 14.81   | 1.43 | 0.023942687 | Up | 0.00160149  | Psd4          | pleckstrin and Sec7 domain containing 4                                             |
| 242248 | 8.67    | 23.40   | 1.43 | 0.004377    | Up | 0.000210253 | Bank1         | B cell scaffold protein with ankyrin repeats 1                                      |
| 108670 | 10.66   | 28.73   | 1.43 | 0.002036684 | Up | 8.43E-05    | Epsti1        | epithelial stromal interaction 1 (breast)                                           |
| 12722  | 3.79    | 10.21   | 1.43 | 0.042406734 | Up | 0.003277098 | Cc1a1         | chloride channel calcium activated 1                                                |
| 26897  | 8.73    | 23.49   | 1.43 | 0.006013225 | Up | 0.000305347 | Acot1         | acyl-CoA thioesterase 1                                                             |
| 17916  | 9.99    | 26.74   | 1.42 | 0.002991237 | Up | 0.000132862 | Myo1f         | myosin IF                                                                           |
| 13611  | 5.41    | 14.42   | 1.42 | 0.024019707 | Up | 0.001609445 | S1pr4         | sphingosine-1-phosphate receptor 4                                                  |
| 17153  | 24.81   | 66.13   | 1.41 | 1.82E-06    | Up | 3.52E-08    | Mal           | myelin and lymphocyte protein, T cell differentiation protein                       |
| 20345  | 19.69   | 52.47   | 1.41 | 3.45E-05    | Up | 8.86E-07    | Selplg        | selectin, platelet (p-selectin) ligand                                              |
| 18987  | 5.15    | 13.65   | 1.41 | 0.03174414  | Up | 0.002306745 | Pou2f2        | POU domain, class 2, transcription factor 2                                         |
| 69165  | 19.09   | 50.09   | 1.39 | 7.46E-05    | Up | 2.08E-06    | Cd209b        | CD209b antigen                                                                      |
| 433294 | 328.96  | 857.56  | 1.38 | 1.35E-63    | Up | 2.67E-66    | Mettl21c      | methyltransferase like 21C                                                          |
| 232975 | 4.79    | 12.45   | 1.38 | 0.043316753 | Up | 0.003362592 | Atp1a3        | ATPase, Na <sup>+</sup> /K <sup>+</sup> transporting, alpha 3 polypeptide           |
| 16205  | 14.77   | 38.36   | 1.38 | 0.000429372 | Up | 1.47E-05    | Gimap1        | GTPase, IMAP family member 1                                                        |
| 54204  | 9.27    | 24.01   | 1.37 | 0.006238418 | Up | 0.000321012 | 1-Sep         | septin 1                                                                            |
| 320435 | 7.65    | 19.44   | 1.35 | 0.016835295 | Up | 0.001032738 | Rinl          | Ras and Rab interactor-like                                                         |
| 381836 | 286.25  | 725.49  | 1.34 | 2.33E-46    | Up | 6.79E-49    | Sbk2          | SH3-binding domain kinase family, member 2                                          |
| 12265  | 7.04    | 17.74   | 1.33 | 0.02756234  | Up | 0.001930212 | Ciita         | class II transactivator                                                             |
| 15170  | 16.98   | 42.57   | 1.33 | 0.000375781 | Up | 1.24E-05    | Ptpn6         | protein tyrosine phosphatase, non-receptor type 6                                   |
| 20613  | 7.74    | 19.31   | 1.32 | 0.026142104 | Up | 0.001795906 | Snai1         | snail homolog 1 (Drosophila)                                                        |
| 12984  | 31.68   | 78.42   | 1.31 | 2.77E-06    | Up | 5.61E-08    | Csf2rb2       | colony stimulating factor 2 receptor, beta 2, low-affinity (granulocyte-macrophage) |
| 76884  | 53.95   | 132.92  | 1.30 | 1.02E-10    | Up | 1.14E-12    | Cyfp2         | cytoplasmic FMR1 interacting protein 2                                              |
| 236312 | 8.86    | 21.72   | 1.29 | 0.01393313  | Up | 0.000824619 | Pyhin1        | pyrin and HIN domain family, member 1                                               |
| 101602 | 6.04    | 14.76   | 1.29 | 0.049761791 | Up | 0.003958753 | Al467606      | expressed sequence Al467606                                                         |
| 105827 | 17.74   | 43.26   | 1.29 | 0.000681536 | Up | 2.47E-05    | Amigo2        | adhesion molecule with Ig like domain 2                                             |
| 434223 | 12.19   | 29.70   | 1.28 | 0.005631378 | Up | 0.000281027 | Gm1966        | predicted gene 1966                                                                 |
| 17528  | 303.86  | 739.91  | 1.28 | 6.30E-52    | Up | 1.66E-54    | Mpz           | myelin protein zero                                                                 |
| 27261  | 8.02    | 19.46   | 1.28 | 0.030376839 | Up | 0.002177246 | Dok3          | docking protein 3                                                                   |
| 217310 | 14.71   | 35.70   | 1.28 | 0.002009655 | Up | 8.29E-05    | Hid1          | HID1 domain containing                                                              |
| 114570 | 9.86    | 23.92   | 1.28 | 0.011624277 | Up | 0.000672061 | Crip3         | cysteine-rich protein 3                                                             |
| 13363  | 7.70    | 18.59   | 1.27 | 0.03589376  | Up | 0.002681609 | Dhh           | desert hedgehog                                                                     |
| 381310 | 14.83   | 35.74   | 1.27 | 0.003247058 | Up | 0.000146879 | 6330403A02Rik | RIKEN cDNA 6330403A02 gene                                                          |
| 171207 | 15.45   | 37.14   | 1.27 | 0.002526086 | Up | 0.000108663 | Arhgap4       | Rho GTPase activating protein 4                                                     |
| 16565  | 18.27   | 43.68   | 1.26 | 0.000890801 | Up | 3.37E-05    | Kif21b        | kinesin family member 21B                                                           |
| 226652 | 21.90   | 52.17   | 1.25 | 0.000317625 | Up | 1.03E-05    | Arhgap30      | Rho GTPase activating protein 30                                                    |
| 232174 | 41.55   | 98.96   | 1.25 | 1.92E-07    | Up | 3.33E-09    | Cyp26b1       | cytochrome P450, family 26, subfamily b, polypeptide 1                              |
| 630499 | 11.79   | 27.86   | 1.24 | 0.009615448 | Up | 0.000535969 | H2-K2         | histocompatibility 2, K region locus 2                                              |
| 14612  | 22.51   | 52.99   | 1.24 | 0.000232064 | Up | 7.31E-06    | Gja4          | gap junction protein, alpha 4                                                       |
| 66402  | 12.74   | 29.91   | 1.23 | 0.008302646 | Up | 0.00044777  | Sln           | sarcophilin                                                                         |
| 105727 | 7.89    | 18.51   | 1.23 | 0.03778231  | Up | 0.00284696  | Slc38a1       | solute carrier family 38, member 1                                                  |
| 269116 | 8.19    | 19.09   | 1.22 | 0.032620994 | Up | 0.002397119 | Nfasc         | neurofascin                                                                         |
| 53374  | 9.89    | 22.97   | 1.22 | 0.026445854 | Up | 0.001821404 | Chst3         | carbohydrate (chondroitin 6/keratan) sulfotransferase 3                             |
| 545030 | 18.21   | 42.03   | 1.21 | 0.001569314 | Up | 6.30E-05    | Wdfy4         | WD repeat and FYVE domain containing 4                                              |
| 20963  | 41.58   | 95.63   | 1.20 | 5.43E-07    | Up | 9.85E-09    | Syk           | spleen tyrosine kinase                                                              |
| 67263  | 20.16   | 46.36   | 1.20 | 0.000771864 | Up | 2.84E-05    | Zswim6        | zinc finger SWIM-type containing 6                                                  |
| 23880  | 10.10   | 23.19   | 1.20 | 0.020881979 | Up | 0.001344354 | Fyb           | FYN binding protein                                                                 |
| 78255  | 17.28   | 39.63   | 1.20 | 0.002622561 | Up | 0.000113514 | Ralgs2        | Ral GEF with PH domain and SH3 binding motif 2                                      |
| 19153  | 79.27   | 180.29  | 1.19 | 8.08E-12    | Up | 8.39E-14    | Prx           | periaxin                                                                            |
| 20665  | 17.93   | 40.53   | 1.18 | 0.003219233 | Up | 0.000145244 | Sox10         | SRY-box containing gene 10                                                          |
| 72121  | 10.08   | 22.73   | 1.17 | 0.026367646 | Up | 0.001814478 | Dennd2d       | DENN/MADD domain containing 2D                                                      |
| 20556  | 16.63   | 37.36   | 1.17 | 0.004592253 | Up | 0.000221665 | Slfm2         | schlafen 2                                                                          |
| 260299 | 22.04   | 49.33   | 1.16 | 0.00095324  | Up | 3.64E-05    | Cadm4         | cell adhesion molecule 4                                                            |
| 20750  | 13.94   | 31.05   | 1.16 | 0.011067277 | Up | 0.000634981 | Spp1          | secreted phosphoprotein 1                                                           |
| 629147 | 211.63  | 470.49  | 1.15 | 1.93E-28    | Up | 7.90E-31    | Ctxn3         | cortexin 3                                                                          |

|        |         |         |      |             |    |             |         |                                                                                   |
|--------|---------|---------|------|-------------|----|-------------|---------|-----------------------------------------------------------------------------------|
| 432530 | 13.95   | 30.77   | 1.14 | 0.013211663 | Up | 0.000778064 | Adcy1   | adenylate cyclase 1                                                               |
| 23893  | 64.43   | 141.38  | 1.13 | 5.53E-09    | Up | 7.72E-11    | Grem2   | gremlin 2 homolog, cysteine knot superfamily (Xenopus laevis)                     |
| 12508  | 18.55   | 40.68   | 1.13 | 0.005439508 | Up | 0.000268696 | Cd53    | CD53 antigen                                                                      |
| 56642  | 405.84  | 889.06  | 1.13 | 3.52E-45    | Up | 1.05E-47    | Ankrd2  | ankyrin repeat domain 2 (stretch responsive muscle)                               |
| 252864 | 10.05   | 21.85   | 1.12 | 0.040482978 | Up | 0.003097717 | Dusp15  | dual specificity phosphatase-like 15                                              |
| 242702 | 318.15  | 691.67  | 1.12 | 6.97E-40    | Up | 2.20E-42    | Myom3   | myomesin family, member 3                                                         |
| 13717  | 90.75   | 197.06  | 1.12 | 8.13E-12    | Up | 8.49E-14    | Eln     | elastin                                                                           |
| 11829  | 195.95  | 421.88  | 1.11 | 1.93E-24    | Up | 9.33E-27    | Aqp4    | aquaporin 4                                                                       |
| 17357  | 13.59   | 28.94   | 1.09 | 0.022313163 | Up | 0.001463841 | Marcks1 | MARCKS-like 1                                                                     |
| 12561  | 144.95  | 307.74  | 1.09 | 7.30E-16    | Up | 5.46E-18    | Cdh4    | cadherin 4                                                                        |
| 75219  | 150.16  | 317.29  | 1.08 | 2.53E-17    | Up | 1.70E-19    | Dusp18  | dual specificity phosphatase 18                                                   |
| 72690  | 13.59   | 28.67   | 1.08 | 0.024824097 | Up | 0.001676675 | Grp1    | glycine/arginine rich protein 1                                                   |
| 100182 | 32.90   | 69.21   | 1.07 | 0.000592575 | Up | 2.09E-05    | Akna    | AT-hook transcription factor                                                      |
| 84094  | 151.47  | 318.29  | 1.07 | 5.07E-17    | Up | 3.55E-19    | Plvap   | plasmalemma vesicle associated protein                                            |
| 13497  | 65.05   | 136.35  | 1.07 | 9.41E-08    | Up | 1.57E-09    | Drp2    | dystrophin related protein 2                                                      |
| 17472  | 42.58   | 88.89   | 1.06 | 8.78E-05    | Up | 2.47E-06    | Gbp4    | guanylate binding protein 4                                                       |
| 238803 | 16.82   | 35.07   | 1.06 | 0.017054641 | Up | 0.001053161 | Zfp366  | zinc finger protein 366                                                           |
| 13107  | 89.13   | 185.06  | 1.05 | 3.51E-10    | Up | 4.18E-12    | Cyp2f2  | cytochrome P450, family 2, subfamily f, polypeptide 2                             |
| 105855 | 27.31   | 56.44   | 1.05 | 0.001857498 | Up | 7.61E-05    | Nckap1l | NCK associated protein 1 like                                                     |
| 94176  | 21.71   | 44.80   | 1.04 | 0.00577526  | Up | 0.000288881 | Dock2   | dedicator of cyto-kinesis 2                                                       |
| 24047  | 13.32   | 27.30   | 1.04 | 0.047637564 | Up | 0.003761958 | Ccl19   | chemokine (C-C motif) ligand 19                                                   |
| 12983  | 39.25   | 80.18   | 1.03 | 0.000239969 | Up | 7.58E-06    | Csf2rb  | colony stimulating factor 2 receptor, beta, low-affinity (granulocyte-macrophage) |
| 14859  | 23.66   | 48.30   | 1.03 | 0.006120632 | Up | 0.000311515 | Gsta3   | glutathione S-transferase, alpha 3                                                |
| 14199  | 4115.79 | 8373.86 | 1.02 | 4.94E-219   | Up | 1.44E-222   | Fhl1    | four and a half LIM domains 1                                                     |
| 17196  | 269.70  | 548.31  | 1.02 | 5.12E-26    | Up | 2.33E-28    | Mbp     | myelin basic protein                                                              |
| 214791 | 20.80   | 42.18   | 1.02 | 0.010896063 | Up | 0.00062325  | Sertad4 | SERTA domain containing 4                                                         |
| 237436 | 20.11   | 40.29   | 1.00 | 0.018688114 | Up | 0.001181301 | Gas2l3  | growth arrest-specific 2 like 3                                                   |

Supplemental Table 4S: List of differential expressed genes in gastrocnemius muscle from *Ctns*<sup>-/-</sup>+Vehicle versus WT+Vehicle mice

| Gene ID | Expression (WT + Vehicle) | Expression (Ctns <sup>-/-</sup> + Vehicle) | log2 Fold Change (Ctns <sup>-/-</sup> + Vehicle / WT + Vehicle) | P - adjusted | Up/Down-Regulation | P value     | Symbol        | Description                                                                                       |
|---------|---------------------------|--------------------------------------------|-----------------------------------------------------------------|--------------|--------------------|-------------|---------------|---------------------------------------------------------------------------------------------------|
| 16658   | 480.81                    | 240.00                                     | -1.00                                                           | 6.55E-22     | Down               | 3.48E-24    | Mafb          | v-maf musculoaponeurotic fibrosarcoma oncogene family, protein B (avian)                          |
| 68149   | 300.79                    | 150.09                                     | -1.00                                                           | 3.87E-14     | Down               | 3.39E-16    | Otub2         | OTU domain, ubiquitin aldehyde binding 2                                                          |
| 77059   | 33.92                     | 16.92                                      | -1.00                                                           | 0.036060923  | Down               | 0.002698308 | 4931408D14Rik | RIKEN cDNA 4931408D14 gene                                                                        |
| 14373   | 215.48                    | 106.60                                     | -1.02                                                           | 5.96E-11     | Down               | 6.54E-13    | G0s2          | G0/G1 switch gene 2                                                                               |
| 57915   | 559.06                    | 275.19                                     | -1.02                                                           | 1.53E-27     | Down               | 6.33E-30    | Tbc1d1        | TBC1 domain family, member 1                                                                      |
| 14561   | 85.57                     | 41.72                                      | -1.04                                                           | 0.000172732  | Down               | 5.25E-06    | Gdf11         | growth differentiation factor 11                                                                  |
| 12683   | 31.92                     | 15.49                                      | -1.04                                                           | 0.027083476  | Down               | 0.001873222 | Cidea         | cell death-inducing DNA fragmentation factor, alpha subunit-like effector A                       |
| 104885  | 46.63                     | 22.62                                      | -1.04                                                           | 0.00711274   | Down               | 0.000374049 | Tmem179       | transmembrane protein 179                                                                         |
| 93761   | 54.06                     | 26.17                                      | -1.05                                                           | 0.002297514  | Down               | 9.68E-05    | Smarca1       | SWI/SNF related, matrix associated, actin dependent regulator of chromatin, subfamily a, member 1 |
| 24066   | 178.73                    | 86.36                                      | -1.05                                                           | 3.31E-09     | Down               | 4.39E-11    | Spry4         | sprouty homolog 4 (Drosophila)                                                                    |
| 67122   | 220.17                    | 106.38                                     | -1.05                                                           | 1.42E-11     | Down               | 1.50E-13    | Nrap          | Notch-regulated ankyrin repeat protein                                                            |
| 15425   | 118.54                    | 57.26                                      | -1.05                                                           | 2.05E-06     | Down               | 4.01E-08    | Hoxc6         | homeobox C6                                                                                       |
| 18766   | 25.20                     | 12.11                                      | -1.06                                                           | 0.045426204  | Down               | 0.003558161 | Pkdrej        | polycystic kidney disease (polycystin) and REJ (sperm receptor for egg jelly homolog, sea urchin) |
| 22695   | 344.63                    | 164.71                                     | -1.07                                                           | 1.03E-18     | Down               | 6.43E-21    | Zfp36         | zinc finger protein 36                                                                            |
| 60510   | 42.47                     | 20.25                                      | -1.07                                                           | 0.006767721  | Down               | 0.000354325 | Syt9          | synaptotagmin IX                                                                                  |
| 15925   | 3103.47                   | 1462.00                                    | -1.09                                                           | 9.41E-120    | Down               | 7.14E-123   | Ide           | insulin degrading enzyme                                                                          |
| 72514   | 28.09                     | 13.22                                      | -1.09                                                           | 0.029120571  | Down               | 0.002070203 | Fgfbp3        | fibroblast growth factor binding protein 3                                                        |
| 18787   | 103.74                    | 47.92                                      | -1.11                                                           | 2.31E-06     | Down               | 4.63E-08    | Serpine1      | serine (or cysteine) peptidase inhibitor, clade E, member 1                                       |
| 74155   | 989.66                    | 450.30                                     | -1.14                                                           | 1.08E-52     | Down               | 2.78E-55    | Erff1         | ERBB receptor feedback inhibitor 1                                                                |
| 63953   | 729.31                    | 331.24                                     | -1.14                                                           | 6.97E-40     | Down               | 2.20E-42    | Dusp10        | dual specificity phosphatase 10                                                                   |
| 18162   | 334.93                    | 151.55                                     | -1.14                                                           | 1.66E-20     | Down               | 9.47E-23    | Npr3          | natriuretic peptide receptor 3                                                                    |
| 396184  | 29.35                     | 13.23                                      | -1.15                                                           | 0.014931571  | Down               | 0.000892426 | Firt1         | fibronectin leucine rich transmembrane protein 1                                                  |
| 193740  | 368.01                    | 164.77                                     | -1.16                                                           | 1.55E-22     | Down               | 7.86E-25    | Hspa1a        | heat shock protein 1A                                                                             |
| 72119   | 75.56                     | 33.76                                      | -1.16                                                           | 4.39E-05     | Down               | 1.16E-06    | Tpx2          | TPX2, microtubule-associated protein homolog (Xenopus laevis)                                     |
| 15511   | 259.61                    | 113.71                                     | -1.19                                                           | 7.72E-15     | Down               | 6.35E-17    | Hspa1b        | heat shock protein 1B                                                                             |
| 12700   | 445.00                    | 193.40                                     | -1.20                                                           | 5.36E-23     | Down               | 2.69E-25    | Cish          | cytokine inducible SH2-containing protein                                                         |
| 623281  | 32.40                     | 13.92                                      | -1.22                                                           | 0.007749873  | Down               | 0.000411173 | Gm11756       | predicted gene 11756                                                                              |
| 67664   | 26.05                     | 11.11                                      | -1.23                                                           | 0.016718606  | Down               | 0.001024604 | Rnf125        | ring finger protein 125                                                                           |
| 17873   | 186.09                    | 78.41                                      | -1.25                                                           | 1.79E-13     | Down               | 1.69E-15    | Gadd45b       | growth arrest and DNA-damage-inducible 45 beta                                                    |
| 16007   | 494.82                    | 208.01                                     | -1.25                                                           | 6.94E-33     | Down               | 2.51E-35    | Cyr61         | cysteine rich protein 61                                                                          |
| 71198   | 889.25                    | 366.83                                     | -1.28                                                           | 7.25E-59     | Down               | 1.61E-61    | Otud1         | OTU domain containing 1                                                                           |
| 217369  | 20.22                     | 8.32                                       | -1.28                                                           | 0.022742384  | Down               | 0.001500182 | Uts2r         | urotensin 2 receptor                                                                              |
| 14284   | 646.60                    | 263.68                                     | -1.29                                                           | 1.78E-46     | Down               | 4.99E-49    | Fosl2         | fos-like antigen 2                                                                                |
| 20618   | 434.21                    | 176.01                                     | -1.30                                                           | 2.51E-26     | Down               | 1.13E-28    | Sncg          | synuclein, gamma                                                                                  |
| 15426   | 66.20                     | 26.81                                      | -1.30                                                           | 1.81E-05     | Down               | 4.35E-07    | Hoxc8         | homeobox C8                                                                                       |
| 11910   | 175.39                    | 70.71                                      | -1.31                                                           | 1.13E-13     | Down               | 1.03E-15    | Atf3          | activating transcription factor 3                                                                 |
| 192663  | 26.74                     | 10.69                                      | -1.32                                                           | 0.005619603  | Down               | 0.000280111 | Abcg4         | ATP-binding cassette, sub-family G (WHITE), member 4                                              |
| 69219   | 130.69                    | 51.74                                      | -1.34                                                           | 1.06E-10     | Down               | 1.19E-12    | Ddah1         | dimethylarginine dimethylaminohydrolase 1                                                         |
| 23850   | 13.34                     | 5.26                                       | -1.34                                                           | 0.042501962  | Down               | 0.003289418 | Pappa2        | pappalysin 2                                                                                      |
| 19252   | 1397.17                   | 550.28                                     | -1.34                                                           | 8.71E-95     | Down               | 8.64E-98    | Dusp1         | dual specificity phosphatase 1                                                                    |
| 241727  | 23.63                     | 9.27                                       | -1.35                                                           | 0.009402531  | Down               | 0.000517057 | Snph          | syntrophin                                                                                        |
| 15205   | 276.35                    | 107.43                                     | -1.36                                                           | 2.80E-21     | Down               | 1.54E-23    | Hes1          | hairy and enhancer of split 1 (Drosophila)                                                        |
| 12795   | 96.43                     | 36.82                                      | -1.39                                                           | 1.19E-08     | Down               | 1.73E-10    | Plk3          | polo-like kinase 3                                                                                |
| 320997  | 169.73                    | 63.81                                      | -1.41                                                           | 4.68E-15     | Down               | 3.74E-17    | Cyp4f39       | cytochrome P450, family 4, subfamily f, polypeptide 39                                            |
| 386463  | 80.12                     | 29.88                                      | -1.42                                                           | 9.22E-08     | Down               | 1.53E-09    | Cdsn          | corneodesmosin                                                                                    |
| 211187  | 68.48                     | 25.53                                      | -1.42                                                           | 1.18E-06     | Down               | 2.22E-08    | Lrtm2         | leucine-rich repeats and transmembrane domains 2                                                  |
| 16545   | 73.35                     | 27.29                                      | -1.43                                                           | 6.42E-07     | Down               | 1.18E-08    | Kera          | keratocan                                                                                         |
| 268595  | 24.27                     | 8.98                                       | -1.43                                                           | 0.004086403  | Down               | 0.000194863 | D430019H16Rik | RIKEN cDNA D430019H16 gene                                                                        |
| 50781   | 695.82                    | 256.22                                     | -1.44                                                           | 2.44E-58     | Down               | 5.56E-61    | Dkk3          | dickkopf homolog 3 (Xenopus laevis)                                                               |
| 215418  | 157.09                    | 57.63                                      | -1.45                                                           | 4.64E-14     | Down               | 4.09E-16    | Csmp1         | cysteine-serine-rich nuclear protein 1                                                            |
| 320485  | 43.80                     | 15.91                                      | -1.46                                                           | 7.08E-05     | Down               | 1.96E-06    | B230312C02Rik | RIKEN cDNA B230312C02 gene                                                                        |
| 13710   | 12.95                     | 4.69                                       | -1.47                                                           | 0.025780246  | Down               | 0.001763524 | Eif3          | E74-like factor 3                                                                                 |
| 20855   | 39.16                     | 13.81                                      | -1.50                                                           | 0.000117414  | Down               | 3.41E-06    | Stc1          | stanniocalcin 1                                                                                   |
| 19219   | 74.41                     | 25.45                                      | -1.55                                                           | 3.72E-08     | Down               | 5.86E-10    | Ptger4        | prostaglandin E receptor 4 (subtype EP4)                                                          |
| 232493  | 20.75                     | 6.98                                       | -1.57                                                           | 0.003990049  | Down               | 0.000188638 | Gys2          | glycogen synthase 2                                                                               |
| 21380   | 576.40                    | 191.28                                     | -1.59                                                           | 8.08E-56     | Down               | 1.89E-58    | Tbx1          | T-box 1                                                                                           |
| 72832   | 19.31                     | 6.41                                       | -1.59                                                           | 0.003848834  | Down               | 0.000180165 | Crtac1        | cartilage acidic protein 1                                                                        |
| 11438   | 10.38                     | 3.41                                       | -1.61                                                           | 0.017092321  | Down               | 0.001057483 | Chma4         | cholinergic receptor, nicotinic, alpha polypeptide 4                                              |
| 24117   | 27.09                     | 8.53                                       | -1.67                                                           | 0.000384068  | Down               | 1.28E-05    | Wif1          | Wnt inhibitory factor 1                                                                           |



|        |         |        |       |             |      |             |         |                                                    |
|--------|---------|--------|-------|-------------|------|-------------|---------|----------------------------------------------------|
| 114564 | 13.53   | 4.14   | -1.71 | 0.005439508 | Down | 0.000269241 | Csprs   | component of Sp100-rs                              |
| 17691  | 807.01  | 232.78 | -1.79 | 3.15E-92    | Down | 3.31E-95    | Sik1    | salt inducible kinase 1                            |
| 18111  | 810.97  | 226.49 | -1.84 | 1.31E-89    | Down | 1.69E-92    | Nnat    | neuronatin                                         |
| 239463 | 10.46   | 2.86   | -1.87 | 0.003947065 | Down | 0.000185915 | Fam83a  | family with sequence similarity 83, member A       |
| 74747  | 385.40  | 103.06 | -1.90 | 3.15E-50    | Down | 8.47E-53    | Ddit4   | DNA-damage-inducible transcript 4                  |
| 21388  | 12.38   | 3.21   | -1.95 | 0.001603502 | Down | 6.47E-05    | Tbx5    | T-box 5                                            |
| 13653  | 509.56  | 114.60 | -2.15 | 4.05E-76    | Down | 6.61E-79    | Egr1    | early growth response 1                            |
| 11838  | 82.89   | 18.22  | -2.19 | 1.22E-12    | Down | 1.21E-14    | Arc     | activity regulated cytoskeletal-associated protein |
| 16477  | 793.95  | 174.28 | -2.19 | 2.21E-118   | Down | 1.81E-121   | Junb    | Jun-B oncogene                                     |
| 381823 | 465.91  | 101.60 | -2.20 | 2.85E-66    | Down | 5.16E-69    | Apold1  | apolipoprotein L domain containing 1               |
| 12227  | 1046.23 | 215.35 | -2.28 | 1.74E-155   | Down | 9.16E-159   | Btg2    | B cell translocation gene 2, anti-proliferative    |
| 13655  | 36.69   | 6.99   | -2.39 | 5.93E-08    | Down | 9.59E-10    | Egr3    | early growth response 3                            |
| 18227  | 336.07  | 59.31  | -2.50 | 4.30E-61    | Down | 8.79E-64    | Nr4a2   | nuclear receptor subfamily 4, group A, member 2    |
| 16846  | 424.45  | 72.13  | -2.56 | 1.31E-77    | Down | 2.06E-80    | Lep     | leptin                                             |
| 14281  | 646.61  | 102.03 | -2.66 | 4.62E-121   | Down | 3.24E-124   | Fos     | FBJ osteosarcoma oncogene                          |
| 235135 | 444.34  | 59.14  | -2.91 | 7.77E-91    | Down | 8.62E-94    | Tmem45b | transmembrane protein 45b                          |
| 14282  | 153.85  | 11.41  | -3.75 | 1.48E-39    | Down | 4.83E-42    | Fosb    | FBJ osteosarcoma oncogene B                        |

Supplemental Table 5S: List of differential expressed genes in gastrocnemius muscle from *Cttns*<sup>-/-</sup>+25(OH)D<sub>3</sub>+1,25(OH)<sub>2</sub>D<sub>3</sub> versus WT+25(OH)D<sub>3</sub>+1,25(OH)<sub>2</sub>D<sub>3</sub> mice

| Gene ID   | Expression (WT + 25(OH)D <sub>3</sub> ) | Expression (Cttns <sup>-/-</sup> + 25(OH)D <sub>3</sub> + 1,25(OH) <sub>2</sub> D <sub>3</sub> ) | log2 Fold Change (Cttns <sup>-/-</sup> + 25(OH)D <sub>3</sub> + 1,25(OH) <sub>2</sub> D <sub>3</sub> / WT + 25(OH)D <sub>3</sub> + 1,25(OH) <sub>2</sub> D <sub>3</sub> ) | P - adjusted | Up/Down-Regulation | P value   | Symbol        | Description                                                                 |
|-----------|-----------------------------------------|--------------------------------------------------------------------------------------------------|---------------------------------------------------------------------------------------------------------------------------------------------------------------------------|--------------|--------------------|-----------|---------------|-----------------------------------------------------------------------------|
| 213742    | 4.16                                    | 1368.16                                                                                          | 8.36                                                                                                                                                                      | 2.77E-113    | Up                 | 7.05E-116 | Xist          | inactive X specific transcripts                                             |
| 100039008 | 4.45                                    | 678.96                                                                                           | 7.25                                                                                                                                                                      | 3.26E-88     | Up                 | 1.11E-90  | Mup10         | major urinary protein 10                                                    |
| 100048884 | 4.19                                    | 344.55                                                                                           | 6.36                                                                                                                                                                      | 1.39E-62     | Up                 | 7.96E-65  | LOC100048884  | novel member of the major urinary protein (Mup) gene family                 |
| 22227     | 2.79                                    | 211.98                                                                                           | 6.25                                                                                                                                                                      | 2.49E-45     | Up                 | 1.97E-47  | Ucp1          | uncoupling protein 1 (mitochondrial, proton carrier)                        |
| 12945     | 2.33                                    | 125.71                                                                                           | 5.76                                                                                                                                                                      | 1.81E-33     | Up                 | 1.96E-35  | Dmbt1         | deleted in malignant brain tumors 1                                         |
| 215384    | 2.18                                    | 77.59                                                                                            | 5.15                                                                                                                                                                      | 7.11E-25     | Up                 | 1.07E-26  | Fcgbp         | Fc fragment of IgG binding protein                                          |
| 11464     | 501.19                                  | 12134.36                                                                                         | 4.60                                                                                                                                                                      | 0            | Up                 | 0         | Actc1         | actin, alpha, cardiac muscle 1                                              |
| 218963    | 3.96                                    | 85.07                                                                                            | 4.42                                                                                                                                                                      | 7.58E-26     | Up                 | 1.09E-27  | Gm1821        | ubiquitin pseudogene                                                        |
| 12824     | 4.27                                    | 84.11                                                                                            | 4.30                                                                                                                                                                      | 2.09E-25     | Up                 | 3.05E-27  | Col2a1        | collagen, type II, alpha 1                                                  |
| 15891     | 1.88                                    | 33.53                                                                                            | 4.15                                                                                                                                                                      | 2.67E-14     | Up                 | 6.55E-16  | lbsp          | integrin binding sialoprotein                                               |
| 100303644 | 2.24                                    | 38.44                                                                                            | 4.10                                                                                                                                                                      | 6.41E-15     | Up                 | 1.51E-16  | C130080G10Rik | RIKEN cDNA C130080G10 gene                                                  |
| 16691     | 2.52                                    | 39.19                                                                                            | 3.96                                                                                                                                                                      | 1.00E-14     | Up                 | 2.40E-16  | Krt8          | keratin 8                                                                   |
| 17386     | 2.83                                    | 40.18                                                                                            | 3.83                                                                                                                                                                      | 1.57E-14     | Up                 | 3.78E-16  | Mmp13         | matrix metalloproteinase 13                                                 |
| 613254    | 2.81                                    | 39.22                                                                                            | 3.80                                                                                                                                                                      | 2.50E-14     | Up                 | 6.12E-16  | AA465934      | expressed sequence AA465934                                                 |
| 619547    | 42.11                                   | 458.60                                                                                           | 3.45                                                                                                                                                                      | 4.48E-105    | Up                 | 1.27E-107 | Rpl34-ps1     | ribosomal protein L34, pseudogene 1                                         |
| 242122    | 1.70                                    | 17.51                                                                                            | 3.36                                                                                                                                                                      | 1.34E-08     | Up                 | 5.35E-10  | Vtcn1         | V-set domain containing T cell activation inhibitor 1                       |
| 14955     | 1235.96                                 | 12419.81                                                                                         | 3.33                                                                                                                                                                      | 0            | Up                 | 0         | H19           | H19 fetal liver mRNA                                                        |
| 17075     | 1.74                                    | 16.78                                                                                            | 3.27                                                                                                                                                                      | 5.09E-08     | Up                 | 2.17E-09  | Epcam         | epithelial cell adhesion molecule                                           |
| 791403    | 18.67                                   | 167.76                                                                                           | 3.17                                                                                                                                                                      | 9.04E-40     | Up                 | 7.94E-42  | D830015G02Rik | RIKEN cDNA D830015G02 gene                                                  |
| 140781    | 1666.51                                 | 14614.38                                                                                         | 3.13                                                                                                                                                                      | 0            | Up                 | 0         | Myh7          | myosin, heavy polypeptide 7, cardiac muscle, beta                           |
| 21952     | 165.30                                  | 1382.32                                                                                          | 3.06                                                                                                                                                                      | 9.43E-287    | Up                 | 9.26E-290 | Tnni1         | troponin I, skeletal, slow 1                                                |
| 18115     | 300.58                                  | 2456.17                                                                                          | 3.03                                                                                                                                                                      | 0            | Up                 | 0         | Nnt           | nicotinamide nucleotide transhydrogenase                                    |
| 17841     | 1.91                                    | 14.96                                                                                            | 2.97                                                                                                                                                                      | 6.82E-07     | Up                 | 3.33E-08  | Mup2          | major urinary protein 2                                                     |
| 100039028 | 4.25                                    | 33.15                                                                                            | 2.96                                                                                                                                                                      | 9.59E-07     | Up                 | 4.76E-08  | Mup11         | major urinary protein 11                                                    |
| 16669     | 9.35                                    | 72.75                                                                                            | 2.96                                                                                                                                                                      | 1.28E-17     | Up                 | 2.55E-19  | Krt19         | keratin 19                                                                  |
| 26458     | 2.26                                    | 17.29                                                                                            | 2.94                                                                                                                                                                      | 4.00E-07     | Up                 | 1.90E-08  | Slc27a2       | solute carrier family 27 (fatty acid transporter), member 2                 |
| 17906     | 476.16                                  | 3641.31                                                                                          | 2.93                                                                                                                                                                      | 0            | Up                 | 0         | Myl2          | myosin, light polypeptide 2, regulatory, cardiac, slow                      |
| 75745     | 84.27                                   | 633.09                                                                                           | 2.91                                                                                                                                                                      | 3.06E-131    | Up                 | 6.71E-134 | Rian          | RNA imprinted and accumulated in nucleus                                    |
| 21924     | 246.57                                  | 1796.25                                                                                          | 2.86                                                                                                                                                                      | 0            | Up                 | 0         | Tnnc1         | troponin C, cardiac/slow skeletal                                           |
| 12683     | 9.58                                    | 67.90                                                                                            | 2.83                                                                                                                                                                      | 1.72E-16     | Up                 | 3.70E-18  | Cidea         | cell death-inducing DNA fragmentation factor, alpha subunit-like effector A |
| 21955     | 376.51                                  | 2607.61                                                                                          | 2.79                                                                                                                                                                      | 0            | Up                 | 0         | Tnnt1         | troponin T1, skeletal, slow                                                 |
| 16364     | 19.25                                   | 132.79                                                                                           | 2.79                                                                                                                                                                      | 6.78E-29     | Up                 | 8.51E-31  | Irf4          | interferon regulatory factor 4                                              |
| 231252    | 2.17                                    | 13.72                                                                                            | 2.66                                                                                                                                                                      | 1.01E-05     | Up                 | 5.81E-07  | Chma9         | cholinergic receptor, nicotinic, alpha polypeptide 9                        |
| 19116     | 7.19                                    | 44.46                                                                                            | 2.63                                                                                                                                                                      | 6.18E-11     | Up                 | 1.99E-12  | Prlr          | prolactin receptor                                                          |
| 170439    | 33.84                                   | 208.61                                                                                           | 2.62                                                                                                                                                                      | 4.63E-42     | Up                 | 3.82E-44  | Elovl6        | ELOVL family member 6, elongation of long chain fatty acids (yeast)         |
| 15375     | 1.46                                    | 8.79                                                                                             | 2.59                                                                                                                                                                      | 6.56E-05     | Up                 | 4.26E-06  | Foxa1         | forkhead box A1                                                             |
| 110308    | 1.47                                    | 8.79                                                                                             | 2.58                                                                                                                                                                      | 7.43E-05     | Up                 | 4.88E-06  | Krt5          | keratin 5                                                                   |
| 11830     | 1.44                                    | 8.50                                                                                             | 2.56                                                                                                                                                                      | 8.33E-05     | Up                 | 5.52E-06  | Aqp5          | aquaporin 5                                                                 |
| 17750     | 69.21                                   | 395.89                                                                                           | 2.52                                                                                                                                                                      | 8.89E-71     | Up                 | 4.11E-73  | Mt2           | metallothionein 2                                                           |
| 15129     | 204.15                                  | 1128.64                                                                                          | 2.47                                                                                                                                                                      | 9.39E-190    | Up                 | 1.46E-192 | Hbb-b1        | hemoglobin, beta adult major chain                                          |
| 243078    | 1.74                                    | 9.51                                                                                             | 2.45                                                                                                                                                                      | 0.00014619   | Up                 | 1.00E-05  | Tecr1         | trans-2,3-enoyl-CoA reductase-like                                          |
| 110310    | 2.10                                    | 11.47                                                                                            | 2.45                                                                                                                                                                      | 9.09E-05     | Up                 | 6.07E-06  | Krt7          | keratin 7                                                                   |
| 100647    | 1.72                                    | 8.88                                                                                             | 2.37                                                                                                                                                                      | 0.00028794   | Up                 | 2.09E-05  | Upk3b         | uroplakin 3B                                                                |
| 80797     | 3.12                                    | 16.10                                                                                            | 2.37                                                                                                                                                                      | 4.00E-05     | Up                 | 2.52E-06  | Cicca2        | chloride channel calcium activated 2                                        |
| 16668     | 7.77                                    | 39.60                                                                                            | 2.35                                                                                                                                                                      | 8.44E-09     | Up                 | 3.34E-10  | Krt18         | keratin 18                                                                  |
| 11656     | 54.73                                   | 275.57                                                                                           | 2.33                                                                                                                                                                      | 7.24E-49     | Up                 | 5.10E-51  | Alas2         | aminolevulinic acid synthase 2, erythroid                                   |
| 327959    | 22.46                                   | 112.71                                                                                           | 2.33                                                                                                                                                                      | 1.94E-20     | Up                 | 3.46E-22  | Xaf1          | XIAP associated factor 1                                                    |
| 20677     | 26.46                                   | 131.23                                                                                           | 2.31                                                                                                                                                                      | 4.46E-23     | Up                 | 7.37E-25  | Sox4          | SRY-box containing gene 4                                                   |
| 17897     | 677.09                                  | 3325.26                                                                                          | 2.30                                                                                                                                                                      | 0            | Up                 | 0         | Myl3          | myosin, light polypeptide 3                                                 |
| 66402     | 14.83                                   | 72.58                                                                                            | 2.29                                                                                                                                                                      | 3.45E-13     | Up                 | 9.37E-15  | Sln           | sarcoplipin                                                                 |
| 11595     | 1.41                                    | 6.88                                                                                             | 2.29                                                                                                                                                                      | 0.00072272   | Up                 | 5.71E-05  | Acan          | aggrecan                                                                    |
| 17002     | 1.37                                    | 6.59                                                                                             | 2.27                                                                                                                                                                      | 0.00081991   | Up                 | 6.53E-05  | Lif           | lactotransferrin                                                            |
| 12740     | 1.44                                    | 6.83                                                                                             | 2.25                                                                                                                                                                      | 0.00094381   | Up                 | 7.64E-05  | Cldn4         | claudin 4                                                                   |
| 11938     | 1478.89                                 | 7002.36                                                                                          | 2.24                                                                                                                                                                      | 0            | Up                 | 0         | Atp2a2        | ATPase, Ca <sup>++</sup> transporting, cardiac muscle, slow twitch 2        |

|           |         |          |      |            |    |            |               |                                                                                                |
|-----------|---------|----------|------|------------|----|------------|---------------|------------------------------------------------------------------------------------------------|
| 100503605 | 1107.41 | 5236.09  | 2.24 | 1.92E-179  | Up | 3.22E-182  | Beta-s        | hemoglobin subunit beta-1-like                                                                 |
| 18667     | 1.31    | 5.97     | 2.19 | 0.0013867  | Up | 0.00011729 | Pgr           | progesterone receptor                                                                          |
| 20533     | 3.67    | 16.54    | 2.17 | 0.00010727 | Up | 7.23E-06   | Slc4a1        | solute carrier family 4 (anion exchanger), member 1                                            |
| 20617     | 9.73    | 43.27    | 2.15 | 2.73E-08   | Up | 1.12E-09   | Snca          | synuclein, alpha                                                                               |
| 50528     | 1.64    | 7.30     | 2.15 | 0.00152064 | Up | 0.00013012 | Tmprss2       | transmembrane protease, serine 2                                                               |
| 12096     | 1.29    | 5.66     | 2.14 | 0.00195103 | Up | 0.00017066 | Bglap         | bone gamma carboxyglutamate protein                                                            |
| 17883     | 21.01   | 90.63    | 2.11 | 3.23E-15   | Up | 7.49E-17   | Myh3          | myosin, heavy polypeptide 3, skeletal muscle, embryonic                                        |
| 21648     | 61.16   | 262.66   | 2.10 | 1.27E-36   | Up | 1.26E-38   | Dynl1b        | dynein light chain Tctex-type 1B                                                               |
| 16664     | 1.26    | 5.36     | 2.09 | 0.00258264 | Up | 0.00023233 | Krt14         | keratin 14                                                                                     |
| 27273     | 2540.21 | 10726.84 | 2.08 | 0          | Up | 0          | Pdk4          | pyruvate dehydrogenase kinase, isoenzyme 4                                                     |
| 110257    | 1046.30 | 4393.77  | 2.07 | 0          | Up | 0          | Hba-a2        | hemoglobin alpha, adult chain 2                                                                |
| 19735     | 38.71   | 161.76   | 2.06 | 3.93E-24   | Up | 6.20E-26   | Rgs2          | regulator of G-protein signaling 2                                                             |
| 12705     | 2.32    | 9.59     | 2.04 | 0.00196669 | Up | 0.00017215 | Cited1        | Cbp/p300-interacting transactivator with Glu/Asp-rich carboxy-terminal domain 1                |
| 15122     | 1701.80 | 6926.27  | 2.03 | 0          | Up | 0          | Hba-a1        | hemoglobin alpha, adult chain 1                                                                |
| 68162     | 9.94    | 40.41    | 2.02 | 1.39E-07   | Up | 6.22E-09   | A930003A15Rik | RIKEN cDNA A930003A15 gene                                                                     |
| 242022    | 6.64    | 26.82    | 2.01 | 1.62E-05   | Up | 9.65E-07   | Frem2         | Fras1 related extracellular matrix protein 2                                                   |
| 14183     | 7.64    | 30.78    | 2.01 | 4.80E-06   | Up | 2.61E-07   | Fgfr2         | fibroblast growth factor receptor 2                                                            |
| 110935    | 1.26    | 5.04     | 2.00 | 0.00438907 | Up | 0.0004207  | Atp6v1b1      | ATPase, H+ transporting, lysosomal V1 subunit B1                                               |
| 631323    | 3.26    | 12.97    | 1.99 | 0.0009692  | Up | 7.91E-05   | Gm12250       | predicted gene 12250                                                                           |
| 15930     | 1.26    | 5.03     | 1.99 | 0.00468817 | Up | 0.00045208 | Ido1          | indoleamine 2,3-dioxygenase 1                                                                  |
| 16372     | 2.27    | 8.99     | 1.98 | 0.00304457 | Up | 0.00027846 | Irx2          | Iroquois related homeobox 2 (Drosophila)                                                       |
| 13371     | 14.01   | 55.26    | 1.98 | 6.10E-09   | Up | 2.37E-10   | Dio2          | deiodinase, iodothyronine, type II                                                             |
| 100040724 | 6.64    | 26.17    | 1.98 | 2.78E-05   | Up | 1.71E-06   | Mirg          | miRNA containing gene                                                                          |
| 11839     | 1.28    | 5.01     | 1.97 | 0.00528645 | Up | 0.00051832 | Areg          | amphiregulin                                                                                   |
| 13999     | 1.62    | 6.33     | 1.97 | 0.00521995 | Up | 0.00051112 | Gm14288       | predicted gene 14288                                                                           |
| 20568     | 1.90    | 7.37     | 1.95 | 0.00477603 | Up | 0.00046165 | Sipi          | secretory leukocyte peptidase inhibitor                                                        |
| 100502868 | 6.24    | 23.90    | 1.94 | 6.02E-05   | Up | 3.89E-06   | Gm20597       | predicted gene, 20597                                                                          |
| 114479    | 1.95    | 7.32     | 1.91 | 0.00651257 | Up | 0.00065246 | Slc5a5        | solute carrier family 5 (sodium iodide symporter), member 5                                    |
| 50706     | 125.90  | 472.96   | 1.91 | 5.72E-63   | Up | 3.24E-65   | Postn         | perostin, osteoblast specific factor                                                           |
| 268709    | 29.63   | 111.19   | 1.91 | 1.26E-15   | Up | 2.84E-17   | Fam107a       | family with sequence similarity 107, member A                                                  |
| 403183    | 21.28   | 79.47    | 1.90 | 9.95E-12   | Up | 2.96E-13   | Mettl21e      | methyltransferase like 21E                                                                     |
| 13661     | 1.89    | 7.05     | 1.90 | 0.00683392 | Up | 0.00068979 | Ehf           | ets homologous factor                                                                          |
| 14104     | 1384.81 | 5158.88  | 1.90 | 0          | Up | 0          | Fasn          | fatty acid synthase                                                                            |
| 76293     | 39.94   | 147.97   | 1.89 | 3.77E-20   | Up | 6.86E-22   | Mfap4         | microfibrillar-associated protein 4                                                            |
| 17263     | 189.55  | 697.04   | 1.88 | 1.48E-87   | Up | 5.22E-90   | Meg3          | maternally expressed 3                                                                         |
| 17748     | 184.57  | 678.47   | 1.88 | 9.01E-85   | Up | 3.23E-87   | Mt1           | metallothionein 1                                                                              |
| 16819     | 3.54    | 13.01    | 1.88 | 0.00198229 | Up | 0.00017363 | Lcn2          | lipocalin 2                                                                                    |
| 109254    | 2.91    | 10.67    | 1.88 | 0.00385846 | Up | 0.00036315 | Adtrp         | androgen dependent TFPI regulating protein                                                     |
| 18725     | 3.98    | 14.23    | 1.84 | 0.00253389 | Up | 0.00022751 | Pira2         | paired-Ig-like receptor A2                                                                     |
| 277468    | 1.16    | 4.13     | 1.84 | 0.01094799 | Up | 0.00118158 | Slc39a12      | solute carrier family 39 (zinc transporter), member 12                                         |
| 109620    | 1.88    | 6.73     | 1.84 | 0.00995749 | Up | 0.00105685 | Dsp           | desmoplakin                                                                                    |
| 76509     | 1.53    | 5.42     | 1.83 | 0.01189343 | Up | 0.00129805 | 1600029D21Rik | RIKEN cDNA 1600029D21 gene                                                                     |
| 20379     | 29.61   | 104.59   | 1.82 | 1.25E-13   | Up | 3.26E-15   | Sfrp4         | secreted frizzled-related protein 4                                                            |
| 104816    | 3.17    | 11.08    | 1.81 | 0.00467457 | Up | 0.0004505  | Aspg          | asparaginase homolog (S. cerevisiae)                                                           |
| 634650    | 3.20    | 11.05    | 1.79 | 0.00558248 | Up | 0.00054993 | Gbp11         | guanylate binding protein 11                                                                   |
| 17207     | 112.51  | 388.21   | 1.79 | 3.47E-47   | Up | 2.59E-49   | Mcf2l         | mcf.2 transforming sequence-like                                                               |
| 235130    | 18.54   | 63.34    | 1.77 | 6.86E-09   | Up | 2.68E-10   | Adamts15      | a disintegrin-like and metallopeptidase (reprolysin type) with thrombospondin type 1 motif, 15 |
| 59006     | 325.41  | 1110.04  | 1.77 | 4.68E-128  | Up | 1.05E-130  | Myoz2         | myozenin 2                                                                                     |
| 21420     | 1.13    | 3.84     | 1.77 | 0.01559196 | Up | 0.00177648 | Tfap2c        | transcription factor AP-2, gamma                                                               |
| 237091    | 1.13    | 3.83     | 1.76 | 0.01580854 | Up | 0.00180846 | Lhfp1l        | lipoma HMGIC fusion partner-like 1                                                             |
| 77794     | 11.86   | 40.16    | 1.76 | 3.99E-06   | Up | 2.13E-07   | Adamts12      | ADAMTS-like 2                                                                                  |
| 70466     | 1.82    | 6.11     | 1.74 | 0.01695272 | Up | 0.00195209 | Ckap2l        | cytoskeleton associated protein 2-like                                                         |
| 26432     | 33.18   | 108.38   | 1.71 | 2.12E-13   | Up | 5.62E-15   | Plod2         | procollagen lysine, 2-oxoglutarate 5-dioxygenase 2                                             |
| 12700     | 137.09  | 445.57   | 1.70 | 5.55E-52   | Up | 3.75E-54   | Cish          | cytokine inducible SH2-containing protein                                                      |
| 22097     | 1.17    | 3.79     | 1.69 | 0.02220077 | Up | 0.00267629 | Tsix          | X (inactive)-specific transcript, antisense                                                    |
| 14462     | 3.14    | 10.11    | 1.69 | 0.01112298 | Up | 0.00120497 | Gata3         | GATA binding protein 3                                                                         |
| 18054     | 1.10    | 3.53     | 1.69 | 0.0227182  | Up | 0.00275264 | Ngp           | neutrophilic granule protein                                                                   |
| 67701     | 2.12    | 6.82     | 1.68 | 0.02055729 | Up | 0.0024396  | Wfdc2         | WAP four-disulfide core domain 2                                                               |
| 12813     | 2.13    | 6.81     | 1.68 | 0.02085463 | Up | 0.00248573 | Col10a1       | collagen, type X, alpha 1                                                                      |
| 53311     | 1641.53 | 5261.07  | 1.68 | 0          | Up | 0          | Mybph         | myosin binding protein H                                                                       |
| 268697    | 1.11    | 3.53     | 1.68 | 0.02380207 | Up | 0.00290808 | Ccnb1         | cyclin B1                                                                                      |
| 107476    | 339.34  | 1070.10  | 1.66 | 9.54E-115  | Up | 2.37E-117  | Acaca         | acetyl-Coenzyme A carboxylase alpha                                                            |
| 18726     | 2.08    | 6.53     | 1.65 | 0.02399588 | Up | 0.00294195 | Lilra6        | leukocyte immunoglobulin-like receptor, subfamily A (with TM domain), member 6                 |
| 110876    | 14.12   | 43.89    | 1.64 | 5.18E-06   | Up | 2.85E-07   | Scn2a1        | sodium channel, voltage-gated, type II, alpha 1                                                |
| 327954    | 2.11    | 6.50     | 1.63 | 0.02792863 | Up | 0.003529   | Dnahc2        | dynein, axonemal, heavy chain 2                                                                |

|           |          |          |      |            |    |            |         |                                                                                                |
|-----------|----------|----------|------|------------|----|------------|---------|------------------------------------------------------------------------------------------------|
| 14038     | 1.05     | 3.25     | 1.62 | 0.02993279 | Up | 0.00383931 | Wfdc18  | WAP four-disulfide core domain 18                                                              |
| 22431     | 1.06     | 3.24     | 1.62 | 0.03047739 | Up | 0.00392501 | Wt1     | Wilms tumor 1 homolog                                                                          |
| 12609     | 313.00   | 960.77   | 1.62 | 2.41E-98   | Up | 7.37E-101  | Cebpδ   | CCAAT/enhancer binding protein (C/EBP), delta                                                  |
| 18948     | 4.25     | 13.00    | 1.61 | 0.01241882 | Up | 0.001364   | Pnmt    | phenylethanolamine-N-methyltransferase                                                         |
| 69352     | 3.43     | 10.48    | 1.61 | 0.01498265 | Up | 0.00169321 | Necab1  | N-terminal EF-hand calcium binding protein 1                                                   |
| 19143     | 3.44     | 10.49    | 1.61 | 0.01532767 | Up | 0.00174017 | St14    | suppression of tumorigenicity 14 (colon carcinoma)                                             |
| 140709    | 4.09     | 12.47    | 1.61 | 0.00999362 | Up | 0.00106184 | Col26a1 | collagen, type XXVI, alpha 1                                                                   |
| 13711     | 1.40     | 4.23     | 1.60 | 0.03722635 | Up | 0.0049523  | Elf5    | E74-like factor 5                                                                              |
| 217154    | 3.13     | 9.46     | 1.60 | 0.02113855 | Up | 0.00252813 | Stac2   | SH3 and cysteine rich domain 2                                                                 |
| 112407    | 243.51   | 734.02   | 1.59 | 3.77E-65   | Up | 2.07E-67   | Egln3   | EGL nine homolog 3 (C. elegans)                                                                |
| 76884     | 53.08    | 159.72   | 1.59 | 1.20E-17   | Up | 2.39E-19   | Cyfp2   | cytoplasmic FMR1 interacting protein 2                                                         |
| 56458     | 318.67   | 957.21   | 1.59 | 2.53E-93   | Up | 8.34E-96   | Foxo1   | forkhead box O1                                                                                |
| 109151    | 219.79   | 659.18   | 1.58 | 1.42E-60   | Up | 8.21E-63   | Chd9    | chromodomain helicase DNA binding protein 9                                                    |
| 59069     | 767.14   | 2287.37  | 1.58 | 1.21E-211  | Up | 1.74E-214  | Tpm3    | tropomyosin 3, gamma                                                                           |
| 171531    | 8.07     | 24.06    | 1.58 | 0.00093081 | Up | 7.52E-05   | Mlph    | melanophilin                                                                                   |
| 13009     | 251.34   | 748.73   | 1.57 | 4.75E-75   | Up | 1.95E-77   | Csp3    | cysteine and glycine-rich protein 3                                                            |
| 18784     | 29.45    | 87.55    | 1.57 | 8.68E-10   | Up | 3.11E-11   | Pla2g5  | phospholipase A2, group V                                                                      |
| 223838    | 19.07    | 56.51    | 1.57 | 5.86E-07   | Up | 2.83E-08   | Adams20 | a disintegrin-like and metallopeptidase (reprolysin type) with thrombospondin type 1 motif, 20 |
| 75104     | 1.08     | 3.21     | 1.57 | 0.038139   | Up | 0.00509404 | Mmd2    | monocyte to macrophage differentiation-associated 2                                            |
| 231507    | 5.45     | 16.09    | 1.56 | 0.00714299 | Up | 0.00072552 | Plac8   | placenta-specific 8                                                                            |
| 18563     | 1189.33  | 3479.57  | 1.55 | 1.42E-283  | Up | 1.47E-286  | Pcx     | pyruvate carboxylase                                                                           |
| 12814     | 19.84    | 58.02    | 1.55 | 1.97E-06   | Up | 1.02E-07   | Col11a1 | collagen, type XI, alpha 1                                                                     |
| 12994     | 1.01     | 2.96     | 1.55 | 0.04165555 | Up | 0.00564858 | Csn3    | casein kappa                                                                                   |
| 16665     | 1.01     | 2.96     | 1.55 | 0.04165555 | Up | 0.00564858 | Krt15   | keratin 15                                                                                     |
| 268857    | 10.44    | 30.33    | 1.54 | 0.000434   | Up | 3.26E-05   | Nlr3    | NLR family, CARD domain containing 3                                                           |
| 12818     | 116.37   | 337.43   | 1.54 | 7.90E-34   | Up | 8.44E-36   | Col14a1 | collagen, type XIV, alpha 1                                                                    |
| 100042065 | 1.02     | 2.95     | 1.53 | 0.04484457 | Up | 0.00616393 | Gm3646  | predicted gene 3646                                                                            |
| 100040972 | 150.06   | 430.41   | 1.52 | 9.17E-40   | Up | 8.10E-42   | Tceal7  | transcription elongation factor A (SII)-like 7                                                 |
| 13447     | 5.75     | 16.45    | 1.52 | 0.00827398 | Up | 0.00086101 | Doc2b   | double C2, beta                                                                                |
| 329278    | 2.41     | 6.88     | 1.52 | 0.04416924 | Up | 0.00605834 | Tnn     | tenascin N                                                                                     |
| 12841     | 2.75     | 7.86     | 1.52 | 0.03889984 | Up | 0.00521421 | Col9a3  | collagen, type IX, alpha 3                                                                     |
| 108912    | 2.76     | 7.83     | 1.50 | 0.04207965 | Up | 0.00571824 | Cdca2   | cell division cycle associated 2                                                               |
| 20255     | 9.12     | 25.69    | 1.49 | 0.00187624 | Up | 0.00016326 | Scg3    | secretogranin III                                                                              |
| 104886    | 17.45    | 49.14    | 1.49 | 1.87E-05   | Up | 1.13E-06   | Rab15   | RAB15, member RAS oncogene family                                                              |
| 244646    | 2.69     | 7.57     | 1.49 | 0.04289496 | Up | 0.00584391 | Pkd113  | polycystic kidney disease 1 like 3                                                             |
| 320563    | 17.05    | 47.93    | 1.49 | 1.38E-05   | Up | 8.10E-07   | Islr2   | immunoglobulin superfamily containing leucine-rich repeat 2                                    |
| 170942    | 158.35   | 444.07   | 1.49 | 4.58E-41   | Up | 3.89E-43   | Erd11   | erythroid differentiation regulator 1                                                          |
| 17060     | 22.41    | 62.49    | 1.48 | 1.03E-06   | Up | 5.17E-08   | Blnk    | B cell linker                                                                                  |
| 140742    | 189.29   | 527.41   | 1.48 | 1.44E-49   | Up | 9.97E-52   | Sesn1   | sestrin 1                                                                                      |
| 13052     | 8.40     | 23.41    | 1.48 | 0.00277752 | Up | 0.00025114 | Cxadr   | coxsackievirus and adenovirus receptor                                                         |
| 241391    | 3.35     | 9.23     | 1.46 | 0.03798235 | Up | 0.00506709 | Galnt5  | UDP-N-acetyl-alpha-D-galactosamine:polypeptide N-acetylgalactosaminyltransferase 5             |
| 234515    | 20.41    | 56.17    | 1.46 | 5.68E-06   | Up | 3.14E-07   | Inpp4b  | inositol polyphosphate-4-phosphatase, type II                                                  |
| 12842     | 1403.24  | 3857.74  | 1.46 | 6.05E-272  | Up | 6.64E-275  | Col1a1  | collagen, type I, alpha 1                                                                      |
| 69065     | 339.88   | 921.59   | 1.44 | 1.26E-79   | Up | 4.89E-82   | Chac1   | ChaC, cation transport regulator 1                                                             |
| 244886    | 39.66    | 107.54   | 1.44 | 9.39E-11   | Up | 3.06E-12   | A118078 | expressed sequence A118078                                                                     |
| 17392     | 15.08    | 40.61    | 1.43 | 0.00019204 | Up | 1.34E-05   | Mmp3    | matrix metalloproteinase 3                                                                     |
| 381835    | 11.35    | 30.41    | 1.42 | 0.00093651 | Up | 7.58E-05   | Gm1078  | predicted gene 1078                                                                            |
| 20216     | 16.32    | 43.69    | 1.42 | 5.86E-05   | Up | 3.77E-06   | Acsm3   | acyl-CoA synthetase medium-chain family member 3                                               |
| 17345     | 8.67     | 23.15    | 1.42 | 0.00392753 | Up | 0.00037053 | Mki67   | antigen identified by monoclonal antibody Ki 67                                                |
| 16371     | 3.63     | 9.62     | 1.40 | 0.04413939 | Up | 0.0060517  | Irx1    | Iroquois related homeobox 1 (Drosophila)                                                       |
| 12350     | 19912.78 | 52668.39 | 1.40 | 0          | Up | 0          | Car3    | carbonic anhydrase 3                                                                           |
| 14063     | 7.01     | 18.52    | 1.40 | 0.01056889 | Up | 0.00113334 | F2r1    | coagulation factor II (thrombin) receptor-like 1                                               |
| 70417     | 10.75    | 28.39    | 1.40 | 0.00252525 | Up | 0.00022629 | Megf10  | multiple EGF-like-domains 10                                                                   |
| 271424    | 267.87   | 699.83   | 1.39 | 1.24E-58   | Up | 7.34E-61   | Ip6k3   | inositol hexaphosphate kinase 3                                                                |
| 74100     | 34.64    | 90.01    | 1.38 | 1.85E-08   | Up | 7.44E-10   | Arpp21  | cyclic AMP-regulated phosphoprotein, 21                                                        |
| 15438     | 90.94    | 236.25   | 1.38 | 1.03E-20   | Up | 1.81E-22   | Hoxd9   | homeobox D9                                                                                    |
| 12159     | 30.97    | 80.42    | 1.38 | 9.46E-08   | Up | 4.16E-09   | Bmp4    | bone morphogenetic protein 4                                                                   |
| 11539     | 272.24   | 706.46   | 1.38 | 3.44E-56   | Up | 2.15E-58   | Adora1  | adenosine A1 receptor                                                                          |
| 12703     | 4.99     | 12.92    | 1.37 | 0.03209072 | Up | 0.00416059 | Socs1   | suppressor of cytokine signaling 1                                                             |
| 15437     | 139.76   | 360.67   | 1.37 | 3.10E-26   | Up | 4.38E-28   | Hoxd8   | homeobox D8                                                                                    |
| 228775    | 5.01     | 12.91    | 1.37 | 0.03441294 | Up | 0.00451536 | Trib3   | tribbles homolog 3 (Drosophila)                                                                |
| 68709     | 44.36    | 114.08   | 1.36 | 1.02E-09   | Up | 3.68E-11   | Cilp2   | cartilage intermediate layer protein 2                                                         |
| 100041621 | 5.48     | 14.09    | 1.36 | 0.03885815 | Up | 0.00520638 | Gm3435  | predicted gene 3435                                                                            |
| 107684    | 7.79     | 20.01    | 1.36 | 0.01634071 | Up | 0.0018769  | Coro2a  | coronin, actin binding protein 2A                                                              |
| 29813     | 147.63   | 377.81   | 1.36 | 2.58E-29   | Up | 3.23E-31   | Zfp385a | zinc finger protein 385A                                                                       |

|           |        |         |      |            |    |            |               |                                                                                               |
|-----------|--------|---------|------|------------|----|------------|---------------|-----------------------------------------------------------------------------------------------|
| 14229     | 276.57 | 706.44  | 1.35 | 1.40E-53   | Up | 9.39E-56   | Fkbp5         | FK506 binding protein 5                                                                       |
| 22229     | 907.04 | 2300.42 | 1.34 | 1.37E-150  | Up | 2.62E-153  | Ucp3          | uncoupling protein 3 (mitochondrial, proton carrier)                                          |
| 213011    | 4.99   | 12.59   | 1.33 | 0.0427525  | Up | 0.00581956 | Zfp583        | zinc finger protein 583                                                                       |
| 16002     | 179.31 | 451.72  | 1.33 | 2.00E-33   | Up | 2.17E-35   | Igf2          | insulin-like growth factor 2                                                                  |
| 23831     | 209.25 | 520.09  | 1.31 | 1.07E-37   | Up | 1.04E-39   | Car14         | carbonic anhydrase 14                                                                         |
| 17684     | 311.50 | 773.39  | 1.31 | 1.26E-58   | Up | 7.48E-61   | Cited2        | Cbp/p300-interacting transactivator, with Glu/Asp-rich carboxy-terminal domain, 2             |
| 140474    | 5.63   | 13.94   | 1.31 | 0.03757275 | Up | 0.00500594 | Muc4          | mucin 4                                                                                       |
| 170952    | 10.32  | 25.51   | 1.31 | 0.00672255 | Up | 0.00067661 | Prima1        | proline rich membrane anchor 1                                                                |
| 230099    | 8.96   | 21.89   | 1.29 | 0.01251491 | Up | 0.00137817 | Car9          | carbonic anhydrase 9                                                                          |
| 320485    | 56.59  | 138.00  | 1.29 | 4.71E-11   | Up | 1.48E-12   | B230312C02Rik | RIKEN cDNA B230312C02 gene                                                                    |
| 11829     | 269.78 | 647.72  | 1.26 | 5.41E-48   | Up | 3.91E-50   | Aqp4          | aquaporin 4                                                                                   |
| 56791     | 43.92  | 105.31  | 1.26 | 1.99E-08   | Up | 8.03E-10   | Ube2l6        | ubiquitin-conjugating enzyme E2L 6                                                            |
| 216459    | 59.02  | 140.58  | 1.25 | 9.41E-10   | Up | 3.38E-11   | Myl6b         | myosin, light polypeptide 6B                                                                  |
| 69590     | 44.89  | 106.65  | 1.25 | 1.34E-08   | Up | 5.31E-10   | Gpx8          | glutathione peroxidase 8 (putative)                                                           |
| 14428     | 12.90  | 30.54   | 1.24 | 0.00369363 | Up | 0.00034724 | Galr2         | galanin receptor 2                                                                            |
| 101401    | 62.55  | 147.69  | 1.24 | 2.49E-11   | Up | 7.64E-13   | Adams9        | a disintegrin-like and metallopeptidase (reprolysin type) with thrombospondin type 1 motif, 9 |
| 99899     | 6.24   | 14.64   | 1.23 | 0.04888311 | Up | 0.00683765 | Iifi44        | interferon-induced protein 44                                                                 |
| 21906     | 8.26   | 19.25   | 1.22 | 0.02845148 | Up | 0.00361315 | Otop1         | otopetrin 1                                                                                   |
| 14783     | 381.50 | 888.22  | 1.22 | 2.41E-54   | Up | 1.56E-56   | Grb10         | growth factor receptor bound protein 10                                                       |
| 70807     | 660.67 | 1530.85 | 1.21 | 2.00E-93   | Up | 6.46E-96   | Arrec2        | arrestin domain containing 2                                                                  |
| 242702    | 440.35 | 1019.64 | 1.21 | 3.26E-67   | Up | 1.69E-69   | Myom3         | myomesin family, member 3                                                                     |
| 57258     | 32.28  | 74.54   | 1.21 | 1.34E-05   | Up | 7.85E-07   | Xpo4          | exportin 4                                                                                    |
| 13106     | 515.35 | 1186.10 | 1.20 | 3.82E-75   | Up | 1.54E-77   | Cyp2e1        | cytochrome P450, family 2, subfamily e, polypeptide 1                                         |
| 268903    | 107.23 | 246.57  | 1.20 | 2.62E-16   | Up | 5.65E-18   | Nrip1         | nuclear receptor interacting protein 1                                                        |
| 547127    | 86.21  | 198.01  | 1.20 | 8.67E-14   | Up | 2.19E-15   | Tmem181b-ps   | transmembrane protein 181B, pseudogene                                                        |
| 21973     | 8.25   | 18.93   | 1.20 | 0.03368574 | Up | 0.00439464 | Top2a         | topoisomerase (DNA) II alpha                                                                  |
| 12550     | 8.86   | 20.32   | 1.20 | 0.0233597  | Up | 0.00284802 | Cdh1          | cadherin 1                                                                                    |
| 11489     | 13.20  | 30.24   | 1.20 | 0.00573327 | Up | 0.00056809 | Adam12        | a disintegrin and metallopeptidase domain 12 (meltrin alpha)                                  |
| 230775    | 6.86   | 15.68   | 1.19 | 0.04790871 | Up | 0.00666145 | Bai2          | brain-specific angiogenesis inhibitor 2                                                       |
| 20425     | 69.54  | 158.90  | 1.19 | 5.55E-11   | Up | 1.77E-12   | Shmt1         | serine hydroxymethyltransferase 1 (soluble)                                                   |
| 66255     | 7.89   | 17.97   | 1.19 | 0.038907   | Up | 0.00521742 | Hsbp111       | heat shock factor binding protein 1-like 1                                                    |
| 433938    | 522.96 | 1183.72 | 1.18 | 8.51E-73   | Up | 3.83E-75   | Mn1           | meningioma 1                                                                                  |
| 69480     | 31.91  | 72.18   | 1.18 | 2.85E-05   | Up | 1.76E-06   | Ttc9          | tetratricopeptide repeat domain 9                                                             |
| 20856     | 21.85  | 49.42   | 1.18 | 0.00039195 | Up | 2.92E-05   | Stc2          | stanniocalcin 2                                                                               |
| 231991    | 11.24  | 25.25   | 1.17 | 0.01791917 | Up | 0.00208719 | Creb5         | cAMP responsive element binding protein 5                                                     |
| 229595    | 221.07 | 495.87  | 1.17 | 8.52E-33   | Up | 9.50E-35   | Adamsl4       | ADAMTS-like 4                                                                                 |
| 71093     | 46.97  | 105.22  | 1.16 | 1.09E-06   | Up | 5.50E-08   | Atoh8         | atonal homolog 8 (Drosophila)                                                                 |
| 18845     | 178.44 | 398.89  | 1.16 | 8.37E-26   | Up | 1.20E-27   | Plexa2        | plexin A2                                                                                     |
| 56788     | 8.84   | 19.67   | 1.15 | 0.03409386 | Up | 0.00446086 | Scube2        | signal peptide, CUB domain, EGF-like 2                                                        |
| 58909     | 171.09 | 379.39  | 1.15 | 1.18E-24   | Up | 1.81E-26   | Fam13a        | family with sequence similarity 13, member A                                                  |
| 12660     | 21.87  | 48.43   | 1.15 | 0.00085257 | Up | 6.82E-05   | Chka          | choline kinase alpha                                                                          |
| 58185     | 26.53  | 58.72   | 1.15 | 0.00019936 | Up | 1.39E-05   | Rsad2         | radical S-adenosyl methionine domain containing 2                                             |
| 12373     | 256.41 | 567.20  | 1.15 | 4.71E-34   | Up | 5.01E-36   | Casq2         | calsequestrin 2                                                                               |
| 69368     | 84.52  | 186.75  | 1.14 | 9.31E-12   | Up | 2.75E-13   | Wdly1         | WD repeat and FYVE domain containing 1                                                        |
| 71481     | 20.17  | 44.49   | 1.14 | 0.00121503 | Up | 0.00010172 | Alpk1         | alpha-kinase 1                                                                                |
| 11556     | 54.85  | 120.21  | 1.13 | 7.79E-08   | Up | 3.38E-09   | Adrb3         | adrenergic receptor, beta 3                                                                   |
| 20319     | 41.84  | 91.49   | 1.13 | 2.63E-06   | Up | 1.37E-07   | Sfrp2         | secreted frizzled-related protein 2                                                           |
| 20672     | 73.81  | 161.33  | 1.13 | 1.37E-10   | Up | 4.49E-12   | Sox18         | SRY-box containing gene 18                                                                    |
| 23956     | 118.43 | 258.63  | 1.13 | 1.05E-16   | Up | 2.21E-18   | Neu2          | neuraminidase 2                                                                               |
| 56839     | 13.87  | 30.24   | 1.12 | 0.01241882 | Up | 0.0013635  | Lgi1          | leucine-rich repeat LGI family, member 1                                                      |
| 13717     | 133.44 | 290.70  | 1.12 | 2.48E-18   | Up | 4.82E-20   | Eln           | elastin                                                                                       |
| 12575     | 226.71 | 493.28  | 1.12 | 1.33E-30   | Up | 1.58E-32   | Cdkn1a        | cyclin-dependent kinase inhibitor 1A (P21)                                                    |
| 67510     | 35.50  | 77.20   | 1.12 | 2.37E-05   | Up | 1.45E-06   | Tvp23b        | trans-golgi network vesicle protein 23B                                                       |
| 269642    | 35.81  | 77.61   | 1.12 | 1.60E-05   | Up | 9.48E-07   | Nat8l         | N-acetyltransferase 8-like                                                                    |
| 12643     | 126.85 | 274.75  | 1.11 | 1.87E-15   | Up | 4.28E-17   | Chad          | chondroadherin                                                                                |
| 64899     | 34.21  | 73.87   | 1.11 | 7.43E-05   | Up | 4.88E-06   | Lpin3         | lipin 3                                                                                       |
| 234593    | 20.84  | 44.80   | 1.10 | 0.00216197 | Up | 0.00019086 | Ndrp4         | N-myc downstream regulated gene 4                                                             |
| 12048     | 159.41 | 342.67  | 1.10 | 1.69E-20   | Up | 3.00E-22   | Bcl2l1        | BCL2-like 1                                                                                   |
| 213393    | 203.41 | 436.62  | 1.10 | 6.23E-25   | Up | 9.32E-27   | 8430408G22Rik | RIKEN cDNA 8430408G22 gene                                                                    |
| 269423    | 41.94  | 89.99   | 1.10 | 2.53E-05   | Up | 1.55E-06   | 3110057O12Rik | RIKEN cDNA 3110057O12 gene                                                                    |
| 268481    | 19.51  | 41.84   | 1.10 | 0.00330437 | Up | 0.00030527 | Krt222        | keratin 222                                                                                   |
| 23984     | 36.48  | 78.24   | 1.10 | 2.49E-05   | Up | 1.52E-06   | Pde10a        | phosphodiesterase 10A                                                                         |
| 63954     | 13.51  | 28.93   | 1.10 | 0.01669599 | Up | 0.00192156 | Rbp7          | retinol binding protein 7, cellular                                                           |
| 100503043 | 130.42 | 278.19  | 1.09 | 7.22E-17   | Up | 1.50E-18   | Armxc4        | armadillo repeat containing, X-linked 4                                                       |
| 14933     | 14.49  | 30.91   | 1.09 | 0.01346064 | Up | 0.00149787 | Gyk           | glycerol kinase                                                                               |

|        |         |         |      |            |    |            |         |                                                                                           |
|--------|---------|---------|------|------------|----|------------|---------|-------------------------------------------------------------------------------------------|
| 545428 | 21.59   | 45.76   | 1.08 | 0.00394694 | Up | 0.0003733  | Ccdc141 | coiled-coil domain containing 141                                                         |
| 12825  | 2840.03 | 6012.18 | 1.08 | 6.48E-267  | Up | 7.86E-270  | Col3a1  | collagen, type III, alpha 1                                                               |
| 140493 | 17.13   | 36.25   | 1.08 | 0.00682542 | Up | 0.00068786 | Kcnn3   | potassium intermediate/small conductance calcium-activated channel, subfamily N, member 3 |
| 16658  | 292.07  | 617.33  | 1.08 | 2.85E-33   | Up | 3.13E-35   | Mafb    | v-maf musculoaponeurotic fibrosarcoma oncogene family, protein B (avian)                  |
| 226438 | 619.27  | 1306.62 | 1.08 | 2.15E-65   | Up | 1.17E-67   | Igfn1   | immunoglobulin-like and fibronectin type III domain containing 1                          |
| 259302 | 19.79   | 41.57   | 1.07 | 0.00354618 | Up | 0.00033233 | Srgap3  | SLIT-ROBO Rho GTPase activating protein 3                                                 |
| 20927  | 23.14   | 48.49   | 1.07 | 0.00176028 | Up | 0.00015205 | Abcc8   | ATP-binding cassette, sub-family C (CFTR/MRP), member 8                                   |
| 17756  | 19.84   | 41.51   | 1.07 | 0.00545218 | Up | 0.00053583 | Map2    | microtubule-associated protein 2                                                          |
| 13175  | 30.82   | 64.03   | 1.05 | 0.0003987  | Up | 2.98E-05   | Dclk1   | doublecortin-like kinase 1                                                                |
| 238803 | 26.10   | 54.15   | 1.05 | 0.00090867 | Up | 7.32E-05   | Zfp366  | zinc finger protein 366                                                                   |
| 22592  | 153.41  | 318.17  | 1.05 | 2.84E-17   | Up | 5.75E-19   | Ercc5   | excision repair cross-complementing rodent repair deficiency, complementation group 5     |
| 217835 | 95.11   | 197.10  | 1.05 | 4.05E-11   | Up | 1.27E-12   | Rin3    | Ras and Rab interactor 3                                                                  |
| 14219  | 316.00  | 647.73  | 1.04 | 1.59E-32   | Up | 1.80E-34   | Ctgf    | connective tissue growth factor                                                           |
| 12702  | 50.41   | 103.15  | 1.03 | 2.88E-06   | Up | 1.51E-07   | Socs3   | suppressor of cytokine signaling 3                                                        |
| 53608  | 107.13  | 218.93  | 1.03 | 1.91E-11   | Up | 5.82E-13   | Map3k6  | mitogen-activated protein kinase kinase 6                                                 |
| 105171 | 587.19  | 1194.60 | 1.02 | 9.18E-59   | Up | 5.35E-61   | Aradc3  | arrestin domain containing 3                                                              |
| 226178 | 1002.61 | 2030.17 | 1.02 | 9.29E-94   | Up | 2.95E-96   | Wbp1l   | WW domain binding protein 1 like                                                          |
| 12374  | 157.69  | 318.25  | 1.01 | 1.10E-16   | Up | 2.32E-18   | Casr    | calcium-sensing receptor                                                                  |
| 74646  | 111.08  | 223.57  | 1.01 | 2.01E-11   | Up | 6.14E-13   | Spsb1   | splA/ryanodine receptor domain and SOCS box containing 1                                  |
| 104099 | 78.42   | 157.39  | 1.00 | 2.61E-08   | Up | 1.06E-09   | Itga9   | integrin alpha 9                                                                          |
| 228966 | 36.76   | 73.68   | 1.00 | 0.0002352  | Up | 1.67E-05   | Ppp1r3d | protein phosphatase 1, regulatory subunit 3D                                              |
| 20365  | 22.74   | 45.59   | 1.00 | 0.00437601 | Up | 0.00041894 | Serf1   | small EDRK-rich factor 1                                                                  |
| 210530 | 23.73   | 47.56   | 1.00 | 0.00338355 | Up | 0.00031396 | Leprel1 | leprecan-like 1                                                                           |
| 319636 | 77.40   | 155.08  | 1.00 | 2.40E-08   | Up | 9.75E-10   | Fsd1l   | fibronectin type III and SPRY domain containing 1-like                                    |
| 16168  | 41.44   | 82.93   | 1.00 | 9.65E-05   | Up | 6.49E-06   | Il15    | interleukin 15                                                                            |

Supplemental Table 5S: List of differential expressed genes in gastrocnemius muscle from *Ctns*<sup>-/-</sup>+25(OH)D<sub>3</sub>+1,25(OH)<sub>2</sub>D<sub>3</sub> versus WT+25(OH)D<sub>3</sub>+1,25(OH)<sub>2</sub>D<sub>3</sub> mice

| Gene ID | Expression (WT + 25(OH)D <sub>3</sub> ) | Expression (Ctns <sup>-/-</sup> + 25(OH)D <sub>3</sub> + 1,25(OH) <sub>2</sub> D <sub>3</sub> ) | log2 Fold Change (Ctns <sup>-/-</sup> + 25(OH)D <sub>3</sub> + 1,25(OH) <sub>2</sub> D <sub>3</sub> / WT + 25(OH)D <sub>3</sub> + 1,25(OH) <sub>2</sub> D <sub>3</sub> ) | P - adjusted | Up/Down-Regulation | P value    | Symbol        | Description                                                                                                   |
|---------|-----------------------------------------|-------------------------------------------------------------------------------------------------|--------------------------------------------------------------------------------------------------------------------------------------------------------------------------|--------------|--------------------|------------|---------------|---------------------------------------------------------------------------------------------------------------|
| 319162  | 153.16                                  | 76.54                                                                                           | -1.00                                                                                                                                                                    | 1.61E-08     | Down               | 6.45E-10   | Hist3h2a      | histone cluster 3, H2a                                                                                        |
| 69142   | 48.82                                   | 24.34                                                                                           | -1.00                                                                                                                                                                    | 0.00507504   | Down               | 0.00049525 | Cd209f        | CD209f antigen                                                                                                |
| 110075  | 30.18                                   | 15.02                                                                                           | -1.01                                                                                                                                                                    | 0.02729094   | Down               | 0.00343738 | Bmp3          | bone morphogenetic protein 3                                                                                  |
| 214854  | 38.54                                   | 18.97                                                                                           | -1.02                                                                                                                                                                    | 0.00835111   | Down               | 0.00087139 | Neur3         | neuritized homolog 3 homolog (Drosophila)                                                                     |
| 102294  | 77.84                                   | 38.18                                                                                           | -1.03                                                                                                                                                                    | 9.11E-05     | Down               | 6.09E-06   | Cyp4v3        | cytochrome P450, family 4, subfamily v, polypeptide 3                                                         |
| 20250   | 487.24                                  | 238.73                                                                                          | -1.03                                                                                                                                                                    | 1.93E-25     | Down               | 2.80E-27   | Scd2          | stearyl-Coenzyme A desaturase 2                                                                               |
| 14677   | 174.09                                  | 85.19                                                                                           | -1.03                                                                                                                                                                    | 1.17E-09     | Down               | 4.24E-11   | Gnai1         | guanine nucleotide binding protein (G protein), alpha inhibiting 1                                            |
| 70415   | 38.17                                   | 18.66                                                                                           | -1.03                                                                                                                                                                    | 0.00922868   | Down               | 0.00097416 | 2610018G03Rik | RIKEN cDNA 2610018G03 gene                                                                                    |
| 53886   | 84.75                                   | 41.27                                                                                           | -1.04                                                                                                                                                                    | 8.68E-05     | Down               | 5.78E-06   | Cdkl2         | cyclin-dependent kinase-like 2 (CDC2-related kinase)                                                          |
| 14204   | 43.19                                   | 20.96                                                                                           | -1.04                                                                                                                                                                    | 0.00394532   | Down               | 0.00037292 | Il4i1         | interleukin 4 induced 1                                                                                       |
| 22778   | 22.83                                   | 11.08                                                                                           | -1.04                                                                                                                                                                    | 0.04930346   | Down               | 0.0069097  | Ikzf1         | IKAROS family zinc finger 1                                                                                   |
| 74365   | 38.80                                   | 18.73                                                                                           | -1.05                                                                                                                                                                    | 0.00908968   | Down               | 0.00095791 | Lonrf3        | LON peptidase N-terminal domain and ring finger 3                                                             |
| 11754   | 890.91                                  | 428.73                                                                                          | -1.06                                                                                                                                                                    | 5.22E-47     | Down               | 3.98E-49   | Aoc3          | amine oxidase, copper containing 3                                                                            |
| 226049  | 71.14                                   | 34.22                                                                                           | -1.06                                                                                                                                                                    | 0.00011929   | Down               | 8.11E-06   | Dmrt2         | doublesex and mab-3 related transcription factor 2                                                            |
| 12721   | 62.19                                   | 29.90                                                                                           | -1.06                                                                                                                                                                    | 0.00026854   | Down               | 1.93E-05   | Coro1a        | coronin, actin binding protein 1A                                                                             |
| 29815   | 118.10                                  | 56.74                                                                                           | -1.06                                                                                                                                                                    | 5.46E-07     | Down               | 2.63E-08   | Bcar3         | breast cancer anti-estrogen resistance 3                                                                      |
| 545554  | 27.86                                   | 13.36                                                                                           | -1.06                                                                                                                                                                    | 0.02146355   | Down               | 0.00256947 | Ankr34a       | ankyrin repeat domain 34A                                                                                     |
| 268878  | 66.12                                   | 31.64                                                                                           | -1.06                                                                                                                                                                    | 0.0003057    | Down               | 2.23E-05   | Atp13a5       | ATPase type 13A5                                                                                              |
| 195727  | 32.84                                   | 15.69                                                                                           | -1.07                                                                                                                                                                    | 0.01178779   | Down               | 0.00128448 | Nhs           | Nance-Horan syndrome (human)                                                                                  |
| 14561   | 91.45                                   | 43.53                                                                                           | -1.07                                                                                                                                                                    | 9.11E-06     | Down               | 5.20E-07   | Gdf11         | growth differentiation factor 11                                                                              |
| 66859   | 117.77                                  | 55.74                                                                                           | -1.08                                                                                                                                                                    | 2.18E-07     | Down               | 9.99E-09   | Slc16a9       | solute carrier family 16 (monocarboxylic acid transporters), member 9                                         |
| 665574  | 31.15                                   | 14.73                                                                                           | -1.08                                                                                                                                                                    | 0.01432751   | Down               | 0.00160841 | Gm7694        | predicted gene 7694                                                                                           |
| 17937   | 129.71                                  | 61.14                                                                                           | -1.09                                                                                                                                                                    | 1.49E-07     | Down               | 6.73E-09   | Nab2          | Ngfi-A binding protein 2                                                                                      |
| 99377   | 41.14                                   | 19.38                                                                                           | -1.09                                                                                                                                                                    | 0.00405768   | Down               | 0.0003852  | Sall4         | sal-like 4 (Drosophila)                                                                                       |
| 666048  | 105.12                                  | 49.49                                                                                           | -1.09                                                                                                                                                                    | 1.01E-06     | Down               | 5.04E-08   | Trab2b        | TraB domain containing 2B                                                                                     |
| 22359   | 3788.82                                 | 1782.04                                                                                         | -1.09                                                                                                                                                                    | 2.02E-177    | Down               | 3.51E-180  | Vldlr         | very low density lipoprotein receptor                                                                         |
| 23794   | 427.87                                  | 200.38                                                                                          | -1.09                                                                                                                                                                    | 3.18E-25     | Down               | 4.65E-27   | Adams5        | a disintegrin-like and metallopeptidase (reprolysin type) with thrombospondin type 1 motif, 5 (aggrecanase-2) |
| 18753   | 175.34                                  | 81.95                                                                                           | -1.10                                                                                                                                                                    | 1.75E-10     | Down               | 5.81E-12   | Prkcd         | protein kinase C, delta                                                                                       |
| 72119   | 75.43                                   | 35.25                                                                                           | -1.10                                                                                                                                                                    | 4.40E-05     | Down               | 2.79E-06   | Tpx2          | TPX2, microtubule-associated protein homolog (Xenopus laevis)                                                 |
| 66487   | 31.72                                   | 14.82                                                                                           | -1.10                                                                                                                                                                    | 0.01602025   | Down               | 0.00183454 | Smim4         | small integral membrane protein 4                                                                             |
| 15483   | 130.77                                  | 61.05                                                                                           | -1.10                                                                                                                                                                    | 1.98E-08     | Down               | 8.00E-10   | Hsd11b1       | hydroxysteroid 11-beta dehydrogenase 1                                                                        |
| 56222   | 260.99                                  | 120.97                                                                                          | -1.11                                                                                                                                                                    | 3.98E-16     | Down               | 8.71E-18   | Cited4        | Cbp/p300-interacting transactivator, with Glu/Asp-rich carboxy-terminal domain, 4                             |
| 381605  | 21.16                                   | 9.76                                                                                            | -1.12                                                                                                                                                                    | 0.03486085   | Down               | 0.00458218 | Tbc1d2        | TBC1 domain family, member 2                                                                                  |
| 66733   | 518.52                                  | 238.22                                                                                          | -1.12                                                                                                                                                                    | 4.01E-30     | Down               | 4.92E-32   | Kcng4         | potassium voltage-gated channel, subfamily G, member 4                                                        |
| 23928   | 40.12                                   | 18.41                                                                                           | -1.12                                                                                                                                                                    | 0.00332164   | Down               | 0.00030706 | Lamc3         | laminin gamma 3                                                                                               |
| 15203   | 57.47                                   | 26.32                                                                                           | -1.13                                                                                                                                                                    | 0.00022911   | Down               | 1.62E-05   | Heph          | hephaestin                                                                                                    |
| 18574   | 18.50                                   | 8.43                                                                                            | -1.13                                                                                                                                                                    | 0.04298497   | Down               | 0.00586362 | Pde1b         | phosphodiesterase 1B, Ca <sup>2+</sup> -calmodulin dependent                                                  |
| 15446   | 61.70                                   | 28.09                                                                                           | -1.14                                                                                                                                                                    | 0.00027714   | Down               | 2.00E-05   | Hpgd          | hydroxyprostaglandin dehydrogenase 15 (NAD)                                                                   |
| 218454  | 132.95                                  | 60.17                                                                                           | -1.14                                                                                                                                                                    | 3.76E-08     | Down               | 1.57E-09   | Lhfp12        | lipoma HMGIC fusion partner-like 2                                                                            |
| 12409   | 304.60                                  | 137.25                                                                                          | -1.15                                                                                                                                                                    | 1.90E-19     | Down               | 3.55E-21   | Cbr2          | carbonyl reductase 2                                                                                          |
| 17873   | 183.38                                  | 82.60                                                                                           | -1.15                                                                                                                                                                    | 1.81E-12     | Down               | 5.09E-14   | Gadd45b       | growth arrest and DNA-damage-inducible 45 beta                                                                |
| 56405   | 74.09                                   | 33.29                                                                                           | -1.15                                                                                                                                                                    | 1.62E-05     | Down               | 9.60E-07   | Dusp14        | dual specificity phosphatase 14                                                                               |
| 68149   | 262.61                                  | 117.77                                                                                          | -1.16                                                                                                                                                                    | 1.72E-16     | Down               | 3.70E-18   | Otub2         | OTU domain, ubiquitin aldehyde binding 2                                                                      |
| 319229  | 43.41                                   | 19.41                                                                                           | -1.16                                                                                                                                                                    | 0.00149229   | Down               | 0.00012752 | Sctr          | secretin receptor                                                                                             |
| 242721  | 146.03                                  | 65.07                                                                                           | -1.17                                                                                                                                                                    | 3.98E-10     | Down               | 1.36E-11   | Klhd7a        | kelch domain containing 7A                                                                                    |
| 327958  | 65.08                                   | 29.00                                                                                           | -1.17                                                                                                                                                                    | 5.17E-05     | Down               | 3.30E-06   | Pitpnm3       | PITPNM family member 3                                                                                        |
| 63953   | 549.02                                  | 241.55                                                                                          | -1.18                                                                                                                                                                    | 2.40E-33     | Down               | 2.62E-35   | Dusp10        | dual specificity phosphatase 10                                                                               |
| 240638  | 19.45                                   | 8.49                                                                                            | -1.20                                                                                                                                                                    | 0.0285663    | Down               | 0.00363598 | Slc16a12      | solute carrier family 16 (monocarboxylic acid transporters), member 12                                        |
| 56221   | 32.45                                   | 14.10                                                                                           | -1.20                                                                                                                                                                    | 0.00363085   | Down               | 0.0003411  | Ccl24         | chemokine (C-C motif) ligand 24                                                                               |
| 101809  | 51.68                                   | 22.45                                                                                           | -1.20                                                                                                                                                                    | 0.00033435   | Down               | 2.46E-05   | Spred3        | sprouty-related, EVH1 domain containing 3                                                                     |
| 72514   | 22.72                                   | 9.87                                                                                            | -1.20                                                                                                                                                                    | 0.02005192   | Down               | 0.00237615 | Fgfbp3        | fibroblast growth factor binding protein 3                                                                    |
| 19662   | 117.72                                  | 50.85                                                                                           | -1.21                                                                                                                                                                    | 4.86E-09     | Down               | 1.86E-10   | Rbp4          | retinol binding protein 4, plasma                                                                             |
| 12479   | 122.68                                  | 52.90                                                                                           | -1.21                                                                                                                                                                    | 5.38E-09     | Down               | 2.07E-10   | Cd1d1         | CD1d1 antigen                                                                                                 |
| 58182   | 19.77                                   | 8.49                                                                                            | -1.22                                                                                                                                                                    | 0.022435     | Down               | 0.00271299 | Prokr1        | prokineticin receptor 1                                                                                       |

|           |         |        |       |            |      |            |               |                                                                                     |
|-----------|---------|--------|-------|------------|------|------------|---------------|-------------------------------------------------------------------------------------|
| 494504    | 137.35  | 57.83  | -1.25 | 7.13E-11   | Down | 2.31E-12   | Apccd1        | adenomatosis polyposis coli down-regulated 1                                        |
| 22698     | 56.68   | 23.78  | -1.25 | 6.81E-05   | Down | 4.43E-06   | Zfp39         | zinc finger protein 39                                                              |
| 319317    | 68.33   | 28.45  | -1.26 | 1.17E-05   | Down | 6.80E-07   | Snhg11        | small nucleolar RNA host gene 11                                                    |
| 244757    | 199.76  | 82.54  | -1.28 | 2.20E-13   | Down | 5.82E-15   | Glb1l2        | galactosidase, beta 1-like 2                                                        |
| 83429     | 81.27   | 33.46  | -1.28 | 1.74E-06   | Down | 8.97E-08   | Ctns          | cystinosis, nephropathic                                                            |
| 15205     | 302.84  | 124.07 | -1.29 | 5.02E-23   | Down | 8.32E-25   | Hes1          | hairy and enhancer of split 1 (Drosophila)                                          |
| 54612     | 332.15  | 136.03 | -1.29 | 2.79E-24   | Down | 4.33E-26   | Sfrp5         | secreted frizzled-related sequence protein 5                                        |
| 71724     | 14.40   | 5.89   | -1.29 | 0.03560532 | Down | 0.00469238 | Aox3          | aldehyde oxidase 3                                                                  |
| 330721    | 12.07   | 4.89   | -1.30 | 0.04742965 | Down | 0.00657405 | Nek5          | NIMA (never in mitosis gene a)-related expressed kinase 5                           |
| 93712     | 27.70   | 11.20  | -1.31 | 0.01250513 | Down | 0.00137637 | Pcdhga4       | protocadherin gamma subfamily A, 4                                                  |
| 396184    | 28.67   | 11.57  | -1.31 | 0.00362241 | Down | 0.0003401  | Flrt1         | fibronectin leucine rich transmembrane protein 1                                    |
| 18712     | 324.83  | 131.08 | -1.31 | 1.56E-24   | Down | 2.38E-26   | Pim1          | proviral integration site 1                                                         |
| 56437     | 41.72   | 16.81  | -1.31 | 0.00026854 | Down | 1.93E-05   | Rrad          | Ras-related associated with diabetes                                                |
| 100039246 | 309.47  | 124.43 | -1.31 | 8.18E-24   | Down | 1.32E-25   | Plac9b        | placenta specific 9b                                                                |
| 14962     | 269.84  | 108.29 | -1.32 | 2.83E-20   | Down | 5.08E-22   | Cfb           | complement factor B                                                                 |
| 60527     | 255.54  | 102.28 | -1.32 | 3.24E-20   | Down | 5.86E-22   | Fads3         | fatty acid desaturase 3                                                             |
| 245038    | 14.03   | 5.59   | -1.33 | 0.03253069 | Down | 0.00423079 | Dclk3         | doublecortin-like kinase 3                                                          |
| 225164    | 253.48  | 100.99 | -1.33 | 9.17E-20   | Down | 1.69E-21   | Mib1          | mindbomb homolog 1 (Drosophila)                                                     |
| 17294     | 182.87  | 72.80  | -1.33 | 5.13E-15   | Down | 1.20E-16   | Mest          | mesoderm specific transcript                                                        |
| 17761     | 110.65  | 43.98  | -1.33 | 7.90E-10   | Down | 2.79E-11   | Map7          | microtubule-associated protein 7                                                    |
| 14859     | 28.37   | 11.20  | -1.34 | 0.00227762 | Down | 0.000202   | Gsta3         | glutathione S-transferase, alpha 3                                                  |
| 11910     | 240.23  | 94.64  | -1.34 | 3.20E-20   | Down | 5.77E-22   | Atf3          | activating transcription factor 3                                                   |
| 239463    | 13.37   | 5.26   | -1.35 | 0.03209406 | Down | 0.00416288 | Fam83a        | family with sequence similarity 83, member A                                        |
| 12223     | 26.32   | 10.26  | -1.36 | 0.00344487 | Down | 0.00032124 | Btc           | betacellulin, epidermal growth factor family member                                 |
| 72203     | 259.69  | 101.03 | -1.36 | 1.39E-19   | Down | 2.57E-21   | 2610507I01Rik | RIKEN cDNA 2610507I01 gene                                                          |
| 69165     | 35.96   | 13.93  | -1.37 | 0.00068685 | Down | 5.40E-05   | Cd209b        | CD209b antigen                                                                      |
| 20519     | 50.65   | 19.52  | -1.38 | 2.72E-05   | Down | 1.67E-06   | Slc22a3       | solute carrier family 22 (organic cation transporter), member 3                     |
| 12829     | 48.98   | 18.86  | -1.38 | 3.90E-05   | Down | 2.45E-06   | Col4a4        | collagen, type IV, alpha 4                                                          |
| 57890     | 21.88   | 8.40   | -1.38 | 0.00964837 | Down | 0.00102125 | Il17re        | interleukin 17 receptor E                                                           |
| 67122     | 176.24  | 67.17  | -1.39 | 3.89E-16   | Down | 8.49E-18   | Nrarp         | Notch-regulated ankyrin repeat protein                                              |
| 381823    | 344.01  | 130.54 | -1.40 | 1.84E-27   | Down | 2.47E-29   | Apold1        | apolipoprotein L domain containing 1                                                |
| 16835     | 229.78  | 86.74  | -1.41 | 4.90E-20   | Down | 8.98E-22   | Ldlr          | low density lipoprotein receptor                                                    |
| 20716     | 170.52  | 64.25  | -1.41 | 3.06E-15   | Down | 7.08E-17   | Serpina3n     | serine (or cysteine) peptidase inhibitor, clade A, member 3N                        |
| 69219     | 130.18  | 48.74  | -1.42 | 9.10E-12   | Down | 2.69E-13   | Ddah1         | dimethylarginine dimethylaminohydrolase 1                                           |
| 229011    | 64.28   | 23.85  | -1.43 | 9.28E-07   | Down | 4.60E-08   | Samd10        | sterile alpha motif domain containing 10                                            |
| 235135    | 270.50  | 99.98  | -1.44 | 3.22E-25   | Down | 4.72E-27   | Tmem45b       | transmembrane protein 45b                                                           |
| 16625     | 103.22  | 38.12  | -1.44 | 5.56E-10   | Down | 1.94E-11   | Serpina3c     | serine (or cysteine) peptidase inhibitor, clade A, member 3C                        |
| 208898    | 11.67   | 4.30   | -1.44 | 0.02593799 | Down | 0.00323251 | Unc13c        | unc-13 homolog C (C. elegans)                                                       |
| 232409    | 15.33   | 5.63   | -1.44 | 0.01328833 | Down | 0.0014764  | Clec2e        | C-type lectin domain family 2, member e                                             |
| 69566     | 41.88   | 15.35  | -1.45 | 0.00014107 | Down | 9.67E-06   | 2310016D03Rik | RIKEN cDNA 2310016D03 gene                                                          |
| 240131    | 1221.20 | 447.61 | -1.45 | 7.98E-102  | Down | 2.31E-104  | Lrrc30        | leucine rich repeat containing 30                                                   |
| 11838     | 50.92   | 18.61  | -1.45 | 1.52E-05   | Down | 9.00E-07   | Arc           | activity regulated cytoskeletal-associated protein                                  |
| 106014    | 114.14  | 41.48  | -1.46 | 9.67E-11   | Down | 3.16E-12   | Fam19a5       | family with sequence similarity 19, member A5                                       |
| 216859    | 9.28    | 3.37   | -1.46 | 0.0396713  | Down | 0.00534513 | Acap1         | ArfGAP with coiled-coil, ankyrin repeat and PH domains 1                            |
| 19219     | 52.95   | 19.21  | -1.46 | 4.78E-06   | Down | 2.60E-07   | Ptger4        | prostaglandin E receptor 4 (subtype EP4)                                            |
| 74843     | 865.37  | 312.83 | -1.47 | 1.23E-77   | Down | 4.90E-80   | Mss51         | MSS51 mitochondrial translational activator                                         |
| 226123    | 54.27   | 19.57  | -1.47 | 3.74E-06   | Down | 1.99E-07   | Morn4         | MORN repeat containing 4                                                            |
| 18430     | 50.60   | 18.24  | -1.47 | 8.12E-06   | Down | 4.61E-07   | Oxtr          | oxytocin receptor                                                                   |
| 56013     | 59.92   | 21.56  | -1.47 | 1.15E-06   | Down | 5.78E-08   | Srcin1        | SRC kinase signaling inhibitor 1                                                    |
| 237858    | 217.12  | 77.87  | -1.48 | 1.07E-20   | Down | 1.89E-22   | Tusc5         | tumor suppressor candidate 5                                                        |
| 67888     | 215.06  | 76.89  | -1.48 | 3.66E-20   | Down | 6.63E-22   | Tmem100       | transmembrane protein 100                                                           |
| 15002     | 11.28   | 4.03   | -1.49 | 0.02449105 | Down | 0.00300732 | H2-Ob         | histocompatibility 2, O region beta locus                                           |
| 192188    | 265.09  | 94.06  | -1.49 | 4.79E-26   | Down | 6.81E-28   | Stab2         | stabilin 2                                                                          |
| 268534    | 7.61    | 2.70   | -1.50 | 0.04298497 | Down | 0.00585914 | Sntg2         | syntrophin, gamma 2                                                                 |
| 71206     | 14.25   | 5.05   | -1.50 | 0.01435024 | Down | 0.00161179 | Katnal2       | katanin p60 subunit A-like 2                                                        |
| 22160     | 67.19   | 23.60  | -1.51 | 2.21E-07   | Down | 1.02E-08   | Twist1        | twist basic helix-loop-helix transcription factor 1                                 |
| 18782     | 54.47   | 18.72  | -1.54 | 3.99E-06   | Down | 2.14E-07   | Pla2g2d       | phospholipase A2, group IID                                                         |
| 380702    | 3.97    | 1.36   | -1.54 | 0.04744918 | Down | 0.00658306 | Shisa6        | shisa homolog 6 (Xenopus laevis)                                                    |
| 72500     | 61.49   | 21.01  | -1.55 | 6.35E-07   | Down | 3.08E-08   | Ier5l         | immediate early response 5-like                                                     |
| 236539    | 174.73  | 59.70  | -1.55 | 9.34E-18   | Down | 1.85E-19   | Phgdh         | 3-phosphoglycerate dehydrogenase                                                    |
| 217682    | 8.24    | 2.74   | -1.59 | 0.02502146 | Down | 0.00309226 | Plekhd1       | pleckstrin homology domain containing, family D (with coiled-coil domains) member 1 |
| 18619     | 128.73  | 42.57  | -1.60 | 1.22E-13   | Down | 3.16E-15   | Penk          | preproenkephalin                                                                    |
| 12741     | 215.77  | 71.29  | -1.60 | 1.17E-23   | Down | 1.90E-25   | Cldn5         | claudin 5                                                                           |
| 11752     | 31.78   | 10.47  | -1.60 | 0.00026161 | Down | 1.87E-05   | Anxa8         | annexin A8                                                                          |
| 244911    | 13.53   | 4.44   | -1.61 | 0.00906142 | Down | 0.00095441 | C2cd4a        | C2 calcium-dependent domain containing 4A                                           |



|           |         |        |       |            |      |            |               |                                                                           |
|-----------|---------|--------|-------|------------|------|------------|---------------|---------------------------------------------------------------------------|
| 16477     | 665.83  | 218.57 | -1.61 | 6.93E-70   | Down | 3.44E-72   | Junb          | Jun-B oncogene                                                            |
| 60510     | 26.55   | 8.71   | -1.61 | 0.00043084 | Down | 3.23E-05   | Syt9          | synaptotagmin IX                                                          |
| 21388     | 12.53   | 4.11   | -1.61 | 0.01099661 | Down | 0.0011881  | Tbx5          | T-box 5                                                                   |
| 55985     | 19.54   | 6.41   | -1.61 | 0.00226729 | Down | 0.00020095 | Cxcl13        | chemokine (C-X-C motif) ligand 13                                         |
| 74596     | 59.12   | 19.38  | -1.61 | 4.00E-07   | Down | 1.90E-08   | Cds1          | CDP-diacylglycerol synthase 1                                             |
| 276891    | 18.81   | 6.14   | -1.62 | 0.00318011 | Down | 0.00029214 | Timd4         | T cell immunoglobulin and mucin domain containing 4                       |
| 207911    | 49.44   | 16.11  | -1.62 | 4.12E-07   | Down | 2.22E-07   | Mchr1         | melanin-concentrating hormone receptor 1                                  |
| 216148    | 158.12  | 51.44  | -1.62 | 8.26E-18   | Down | 1.63E-19   | Shc2          | SHC (Src homology 2 domain containing) transforming protein 2             |
| 114249    | 127.79  | 41.51  | -1.62 | 9.28E-15   | Down | 2.22E-16   | Npnt          | nephronectin                                                              |
| 56747     | 8.54    | 2.77   | -1.62 | 0.02091716 | Down | 0.00249561 | Sez6l         | seizure related 6 homolog like                                            |
| 22095     | 79.11   | 25.31  | -1.64 | 1.41E-09   | Down | 5.14E-11   | Tshr          | thyroid stimulating hormone receptor                                      |
| 12029     | 429.26  | 137.21 | -1.65 | 1.19E-46   | Down | 9.22E-49   | Bcl6b         | B cell CLL/lymphoma 6, member B                                           |
| 78334     | 536.10  | 169.71 | -1.66 | 6.02E-55   | Down | 3.86E-57   | Cdk19         | cyclin-dependent kinase 19                                                |
| 14281     | 611.75  | 193.46 | -1.66 | 1.51E-66   | Down | 7.94E-69   | Fos           | FBJ osteosarcoma oncogene                                                 |
| 18985     | 5.57    | 1.75   | -1.67 | 0.02499413 | Down | 0.00308659 | Pou2af1       | POU domain, class 2, associating factor 1                                 |
| 386463    | 68.41   | 21.40  | -1.68 | 1.59E-08   | Down | 6.36E-10   | Cdsn          | comedesmosin                                                              |
| 13655     | 22.08   | 6.85   | -1.69 | 0.00101133 | Down | 8.31E-05   | Egr3          | early growth response 3                                                   |
| 68800     | 14.49   | 4.48   | -1.69 | 0.00445666 | Down | 0.00042769 | 1110059M19Rik | RIKEN cDNA 1110059M19 gene                                                |
| 16373     | 96.09   | 29.64  | -1.70 | 6.60E-12   | Down | 1.91E-13   | Irx3          | Iroquois related homeobox 3 (Drosophila)                                  |
| 15242     | 31.80   | 9.80   | -1.70 | 7.34E-05   | Down | 4.81E-06   | Hhex          | hematopoietically expressed homeobox                                      |
| 11497     | 3.57    | 1.10   | -1.70 | 0.02166002 | Down | 0.0025955  | Adam3         | a disintegrin and metallopeptidase domain 3 (cytitesin)                   |
| 239845    | 5.09    | 1.57   | -1.70 | 0.02320701 | Down | 0.00282512 | Gpr156        | G protein-coupled receptor 156                                            |
| 93707     | 7.39    | 2.27   | -1.70 | 0.01964192 | Down | 0.00232076 | Pcdhgc4       | protocadherin gamma subfamily C, 4                                        |
| 14563     | 4.84    | 1.48   | -1.70 | 0.02249429 | Down | 0.00272146 | Gdf5          | growth differentiation factor 5                                           |
| 21940     | 11.21   | 3.44   | -1.71 | 0.00755433 | Down | 0.00077691 | Cd27          | CD27 antigen                                                              |
| 237847    | 52.48   | 16.05  | -1.71 | 2.14E-07   | Down | 9.78E-09   | Rtn4r1        | reticulon 4 receptor-like 1                                               |
| 11668     | 2279.82 | 696.46 | -1.71 | 3.32E-204  | Down | 4.98E-207  | Aldh1a1       | aldehyde dehydrogenase family 1, subfamily A1                             |
| 100041585 | 65.25   | 19.92  | -1.71 | 1.11E-07   | Down | 4.94E-09   | Amd2          | S-adenosylmethionine decarboxylase 2                                      |
| 330723    | 135.32  | 41.29  | -1.71 | 1.17E-15   | Down | 2.61E-17   | Htra4         | HtrA serine peptidase 4                                                   |
| 619665    | 6.14    | 1.84   | -1.74 | 0.01791704 | Down | 0.0020859  | Klf14         | Kruppel-like factor 14                                                    |
| 14545     | 359.95  | 107.42 | -1.74 | 5.32E-44   | Down | 4.27E-46   | Gdap1         | ganglioside-induced differentiation-associated-protein 1                  |
| 71198     | 949.58  | 282.54 | -1.75 | 1.40E-109  | Down | 3.79E-112  | Otd1          | OTU domain containing 1                                                   |
| 626578    | 75.70   | 22.45  | -1.75 | 8.05E-10   | Down | 2.86E-11   | Gbp10         | guanylate-binding protein 10                                              |
| 80796     | 3.86    | 1.13   | -1.75 | 0.01532263 | Down | 0.00173871 | Calm4         | calmodulin 4                                                              |
| 320092    | 293.60  | 85.93  | -1.77 | 1.91E-36   | Down | 1.92E-38   | E030003E18Rik | RIKEN cDNA E030003E18 gene                                                |
| 12145     | 3.87    | 1.13   | -1.77 | 0.01505475 | Down | 0.0017031  | Cxcr5         | chemokine (C-X-C motif) receptor 5                                        |
| 93721     | 6.45    | 1.87   | -1.78 | 0.01382356 | Down | 0.00154134 | Cpn1          | carboxypeptidase N, polypeptide 1                                         |
| 70192     | 17.80   | 5.17   | -1.78 | 0.00105697 | Down | 8.71E-05   | Cd209g        | CD209g antigen                                                            |
| 15439     | 669.31  | 190.31 | -1.81 | 5.63E-79   | Down | 2.21E-81   | Hp            | haptoglobin                                                               |
| 276950    | 17.41   | 4.89   | -1.83 | 0.00099697 | Down | 8.16E-05   | Sifn8         | schlafen 8                                                                |
| 12795     | 91.71   | 25.75  | -1.83 | 1.10E-12   | Down | 3.07E-14   | Plk3          | polo-like kinase 3                                                        |
| 74513     | 89.38   | 25.06  | -1.83 | 1.33E-12   | Down | 3.73E-14   | Neto2         | neuropilin (NRP) and tolloid (TLL)-like 2                                 |
| 12483     | 9.10    | 2.55   | -1.83 | 0.00682542 | Down | 0.00068814 | Cd22          | CD22 antigen                                                              |
| 20343     | 9.39    | 2.60   | -1.85 | 0.00636786 | Down | 0.00063723 | Sell          | selectin, lymphocyte                                                      |
| 18505     | 15.38   | 4.25   | -1.85 | 0.0015361  | Down | 0.00013167 | Pax3          | paired box gene 3                                                         |
| 272382    | 6.80    | 1.86   | -1.87 | 0.00795393 | Down | 0.0008231  | Spib          | Spi-B transcription factor (Spi-1/PU.1 related)                           |
| 104582    | 5.76    | 1.57   | -1.87 | 0.00920332 | Down | 0.00097042 | Rprml         | reprimin-like                                                             |
| 114564    | 14.42   | 3.89   | -1.89 | 0.00136217 | Down | 0.00011498 | Csprs         | component of Sp100-rs                                                     |
| 100502636 | 18.62   | 5.00   | -1.90 | 0.00066459 | Down | 5.20E-05   | Gm19299       | predicted gene, 19299                                                     |
| 620078    | 5.79    | 1.54   | -1.91 | 0.00727438 | Down | 0.00074223 | C130026121Rik | RIKEN cDNA C130026121 gene                                                |
| 17927     | 274.20  | 71.10  | -1.95 | 8.54E-39   | Down | 7.74E-41   | Myod1         | myogenic differentiation 1                                                |
| 27222     | 10.05   | 2.60   | -1.95 | 0.00298982 | Down | 0.00027207 | Atp1a4        | ATPase, Na <sup>+</sup> /K <sup>+</sup> transporting, alpha 4 polypeptide |
| 19207     | 23.03   | 5.93   | -1.96 | 8.67E-05   | Down | 5.77E-06   | Ptch2         | patched homolog 2                                                         |
| 18419     | 15.37   | 3.94   | -1.96 | 0.00071884 | Down | 5.67E-05   | Otog          | otogelin                                                                  |
| 18162     | 549.61  | 140.35 | -1.97 | 6.36E-74   | Down | 2.76E-76   | Npr3          | natriuretic peptide receptor 3                                            |
| 78102     | 18.37   | 4.61   | -2.00 | 0.00023501 | Down | 1.67E-05   | 8430426J06Rik | RIKEN cDNA 8430426J06 gene                                                |
| 69564     | 1404.80 | 345.97 | -2.02 | 4.37E-185  | Down | 7.07E-188  | Nmrk2         | nicotinamide riboside kinase 2                                            |
| 16069     | 30.99   | 7.61   | -2.03 | 4.14E-06   | Down | 2.24E-07   | Igj           | immunoglobulin joining chain                                              |
| 21844     | 312.83  | 76.11  | -2.04 | 4.05E-47   | Down | 3.06E-49   | Tiam1         | T cell lymphoma invasion and metastasis 1                                 |
| 434510    | 8.04    | 1.95   | -2.04 | 0.00260019 | Down | 0.00023406 | Gm5627        | predicted gene 5627                                                       |
| 211480    | 11.00   | 2.66   | -2.05 | 0.00136801 | Down | 0.00011556 | Kcnj14        | potassium inwardly-rectifying channel, subfamily J, member 14             |
| 14412     | 40.64   | 9.60   | -2.08 | 8.57E-08   | Down | 3.75E-09   | Sic6a13       | solute carrier family 6 (neurotransmitter transporter, GABA), member 13   |
| 53320     | 19.69   | 4.60   | -2.10 | 6.24E-05   | Down | 4.04E-06   | Folh1         | folate hydrolase 1                                                        |
| 211187    | 97.89   | 22.54  | -2.12 | 2.71E-16   | Down | 5.86E-18   | Lrtm2         | leucine-rich repeats and transmembrane domains 2                          |
| 74556     | 7.04    | 1.62   | -2.12 | 0.00190038 | Down | 0.00016568 | Themis3       | thymocyte selection associated family member 3                            |

|        |          |         |       |            |      |            |               |                                                                                 |
|--------|----------|---------|-------|------------|------|------------|---------------|---------------------------------------------------------------------------------|
| 20618  | 474.04   | 107.94  | -2.13 | 1.46E-73   | Down | 6.40E-76   | Sncg          | synuclein, gamma                                                                |
| 21380  | 476.64   | 108.30  | -2.14 | 1.07E-72   | Down | 4.90E-75   | Tbx1          | T-box 1                                                                         |
| 14573  | 16.30    | 3.68    | -2.15 | 0.00016811 | Down | 1.16E-05   | Gdnf          | glial cell line derived neurotrophic factor                                     |
| 69169  | 10.61    | 2.38    | -2.16 | 0.00083989 | Down | 6.70E-05   | Faim3         | Fas apoptotic inhibitory molecule 3                                             |
| 11438  | 8.97     | 2.01    | -2.16 | 0.00113768 | Down | 9.47E-05   | Chma4         | cholinergic receptor, nicotinic, alpha polypeptide 4                            |
| 12902  | 5.98     | 1.34    | -2.16 | 0.00169516 | Down | 0.00014603 | Cr2           | complement receptor 2                                                           |
| 84112  | 29.93    | 6.69    | -2.16 | 1.98E-06   | Down | 1.02E-07   | Sucnr1        | succinate receptor 1                                                            |
| 72832  | 19.31    | 4.32    | -2.16 | 4.89E-05   | Down | 3.11E-06   | Crtac1        | cartilage acidic protein 1                                                      |
| 12478  | 9.26     | 2.06    | -2.17 | 0.00104231 | Down | 8.58E-05   | Cd19          | CD19 antigen                                                                    |
| 192663 | 21.55    | 4.76    | -2.18 | 3.43E-05   | Down | 2.14E-06   | Abcg4         | ATP-binding cassette, sub-family G (WHITE), member 4                            |
| 81879  | 150.50   | 32.86   | -2.20 | 5.15E-25   | Down | 7.67E-27   | Tfcp2l1       | transcription factor CP2-like 1                                                 |
| 75697  | 6.32     | 1.34    | -2.24 | 0.00097638 | Down | 7.98E-05   | C2cd4b        | C2 calcium-dependent domain containing 4B                                       |
| 13421  | 11.94    | 2.38    | -2.33 | 0.00017473 | Down | 1.21E-05   | Dnase1l3      | deoxyribonuclease 1-like 3                                                      |
| 268595 | 34.15    | 6.78    | -2.33 | 1.18E-07   | Down | 5.26E-09   | D430019H16Rik | RIKEN cDNA D430019H16 gene                                                      |
| 170706 | 235.61   | 46.54   | -2.34 | 4.61E-39   | Down | 4.13E-41   | Tmem37        | transmembrane protein 37                                                        |
| 16516  | 56.54    | 10.70   | -2.40 | 3.89E-12   | Down | 1.11E-13   | Kcnj15        | potassium inwardly-rectifying channel, subfamily J, member 15                   |
| 330863 | 25.51    | 4.79    | -2.41 | 1.05E-06   | Down | 5.29E-08   | Trim67        | tripartite motif-containing 67                                                  |
| 319734 | 56.50    | 10.39   | -2.44 | 3.17E-12   | Down | 8.97E-14   | Cacna2d4      | calcium channel, voltage-dependent, alpha 2/delta subunit 4                     |
| 12482  | 9.59     | 1.74    | -2.46 | 0.00012809 | Down | 8.75E-06   | Ms4a1         | membrane-spanning 4-domains, subfamily A, member 1                              |
| 11702  | 14494.83 | 2584.21 | -2.49 | 0          | Down | 0          | Amd1          | S-adenosylmethionine decarboxylase 1                                            |
| 12274  | 15.85    | 2.80    | -2.50 | 1.67E-05   | Down | 9.98E-07   | C6            | complement component 6                                                          |
| 232941 | 13.87    | 2.45    | -2.50 | 3.06E-05   | Down | 1.89E-06   | Ppm1n         | protein phosphatase, Mg2+/Mn2+ dependent, 1N (putative)                         |
| 12518  | 17.16    | 2.81    | -2.61 | 4.44E-06   | Down | 2.40E-07   | Cd79a         | CD79A antigen (immunoglobulin-associated alpha)                                 |
| 18227  | 382.52   | 61.12   | -2.65 | 9.75E-75   | Down | 4.05E-77   | Nr4a2         | nuclear receptor subfamily 4, group A, member 2                                 |
| 73339  | 14.46    | 2.20    | -2.72 | 6.00E-06   | Down | 3.33E-07   | 1700047G03Rik | RIKEN cDNA 1700047G03 gene                                                      |
| 230810 | 157.85   | 23.90   | -2.72 | 1.53E-30   | Down | 1.82E-32   | Slc30a2       | solute carrier family 30 (zinc transporter), member 2                           |
| 14128  | 10.47    | 1.52    | -2.78 | 1.12E-05   | Down | 6.48E-07   | Fcer2a        | Fc receptor, IgE, low affinity II, alpha polypeptide                            |
| 63993  | 12.81    | 1.85    | -2.79 | 5.23E-06   | Down | 2.88E-07   | Slc5a7        | solute carrier family 5 (choline transporter), member 7                         |
| 17167  | 14.08    | 1.91    | -2.88 | 1.94E-06   | Down | 1.00E-07   | Marco         | macrophage receptor with collagenous structure                                  |
| 18111  | 658.46   | 77.88   | -3.08 | 8.27E-137  | Down | 1.67E-139  | Nnat          | neuronatin                                                                      |
| 20860  | 14.69    | 1.63    | -3.17 | 1.63E-07   | Down | 7.38E-09   | Sult1e1       | sulfotransferase family 1E, member 1                                            |
| 20527  | 213.84   | 23.54   | -3.18 | 9.18E-50   | Down | 6.31E-52   | Slc2a3        | solute carrier family 2 (facilitated glucose transporter), member 3             |
| 242894 | 154.16   | 15.62   | -3.30 | 1.01E-37   | Down | 9.79E-40   | Actr3b        | ARP3 actin-related protein 3B                                                   |
| 73598  | 155.17   | 14.99   | -3.37 | 3.23E-38   | Down | 3.06E-40   | 1700001O22Rik | RIKEN cDNA 1700001O22 gene                                                      |
| 277898 | 39.58    | 3.39    | -3.54 | 1.20E-13   | Down | 3.10E-15   | Slc15a5       | solute carrier family 15, member 5                                              |
| 16846  | 911.84   | 50.91   | -4.16 | 8.55E-214  | Down | 1.14E-216  | Lep           | leptin                                                                          |
| 109828 | 301.19   | 14.87   | -4.34 | 3.20E-74   | Down | 1.35E-76   | C7            | complement component 7                                                          |
| 208151 | 186.49   | 6.69    | -4.80 | 1.39E-47   | Down | 1.02E-49   | Tmem132b      | transmembrane protein 132B                                                      |
| 50781  | 1148.25  | 40.15   | -4.84 | 3.26E-250  | Down | 4.15E-253  | Dkk3          | dickkopf homolog 3 (Xenopus laevis)                                             |
| 20592  | 106.01   | 2.25    | -5.56 | 1.59E-30   | Down | 1.91E-32   | Kdm5d         | lysine (K)-specific demethylase 5D                                              |
| 22290  | 144.55   | 2.36    | -5.94 | 1.86E-36   | Down | 1.86E-38   | Uty           | ubiquitously transcribed tetratricopeptide repeat gene, Y chromosome            |
| 26908  | 472.19   | 2.82    | -7.39 | 1.08E-65   | Down | 5.80E-68   | Eif2s3y       | eukaryotic translation initiation factor 2, subunit 3, structural gene Y-linked |
| 26900  | 827.16   | 3.04    | -8.09 | 2.57E-84   | Down | 9.51E-87   | Ddx3y         | DEAD (Asp-Glu-Ala-Asp) box polypeptide 3, Y-linked                              |

Supplemental Table 6S: List of differential expressed genes in gastrocnemius muscle from *Ctns*<sup>-/-</sup>+ 25(OH)D<sub>3</sub>+ 1,25(OH)<sub>2</sub>D<sub>3</sub> versus *Ctns*<sup>-/-</sup>+ Vehicle mice

| Gene ID   | Expression (Ctns <sup>-/-</sup> + Vehicle) | Expression (Ctns <sup>-/-</sup> + 25(OH)D <sub>3</sub> + 1,25(OH) <sub>2</sub> D <sub>3</sub> ) | log2 Fold Change (Ctns <sup>-/-</sup> + 25(OH)D <sub>3</sub> + 1,25(OH) <sub>2</sub> D <sub>3</sub> / Ctns <sup>-/-</sup> + Vehicle) | P - adjusted | Up/Down-Regulation | P value     | Symbol        | Description                                                         |
|-----------|--------------------------------------------|-------------------------------------------------------------------------------------------------|--------------------------------------------------------------------------------------------------------------------------------------|--------------|--------------------|-------------|---------------|---------------------------------------------------------------------|
| 213742    | 3.70                                       | 1308.90                                                                                         | 8.47                                                                                                                                 | 4.25E-103    | Up                 | 9.31E-106   | Xist          | inactive X specific transcripts                                     |
| 22227     | 3.20                                       | 202.79                                                                                          | 5.99                                                                                                                                 | 6.79E-44     | Up                 | 4.19E-46    | Ucp1          | uncoupling protein 1 (mitochondrial, proton carrier)                |
| 12945     | 2.40                                       | 120.12                                                                                          | 5.65                                                                                                                                 | 6.85E-32     | Up                 | 6.39E-34    | Dmbt1         | deleted in malignant brain tumors 1                                 |
| 215384    | 2.85                                       | 74.13                                                                                           | 4.70                                                                                                                                 | 5.95E-23     | Up                 | 7.89E-25    | Fcgbp         | Fc fragment of IgG binding protein                                  |
| 218963    | 3.16                                       | 81.18                                                                                           | 4.68                                                                                                                                 | 9.93E-25     | Up                 | 1.23E-26    | Gm1821        | ubiquitin pseudogene                                                |
| 100039008 | 29.20                                      | 650.18                                                                                          | 4.48                                                                                                                                 | 2.95E-144    | Up                 | 4.09E-147   | Mup10         | major urinary protein 10                                            |
| 12824     | 4.75                                       | 80.41                                                                                           | 4.08                                                                                                                                 | 1.48E-23     | Up                 | 1.93E-25    | Col2a1        | collagen, type II, alpha 1                                          |
| 15891     | 1.93                                       | 31.96                                                                                           | 4.05                                                                                                                                 | 1.90E-13     | Up                 | 4.35E-15    | Ibsp          | integrin binding sialoprotein                                       |
| 17386     | 2.60                                       | 38.27                                                                                           | 3.88                                                                                                                                 | 4.76E-14     | Up                 | 1.02E-15    | Mmp13         | matrix metalloproteinase 13                                         |
| 100048884 | 22.50                                      | 330.07                                                                                          | 3.87                                                                                                                                 | 1.58E-75     | Up                 | 5.66E-78    | LOC100048884  | novel member of the major urinary protein (Mup) gene family         |
| 16691     | 2.60                                       | 37.40                                                                                           | 3.85                                                                                                                                 | 9.50E-14     | Up                 | 2.11E-15    | Krt8          | keratin 8                                                           |
| 613254    | 2.89                                       | 37.37                                                                                           | 3.70                                                                                                                                 | 2.37E-13     | Up                 | 5.49E-15    | AA465934      | expressed sequence AA465934                                         |
| 14282     | 11.11                                      | 100.25                                                                                          | 3.17                                                                                                                                 | 1.07E-24     | Up                 | 1.32E-26    | Fosb          | FBJ osteosarcoma oncogene B                                         |
| 17750     | 43.51                                      | 378.58                                                                                          | 3.12                                                                                                                                 | 1.06E-79     | Up                 | 3.49E-82    | Mt2           | metallothionein 2                                                   |
| 75745     | 69.87                                      | 605.66                                                                                          | 3.12                                                                                                                                 | 1.14E-128    | Up                 | 1.85E-131   | Rian          | RNA imprinted and accumulated in nucleus                            |
| 242122    | 2.04                                       | 16.73                                                                                           | 3.04                                                                                                                                 | 2.91E-07     | Up                 | 1.22E-08    | Vtcn1         | V-set domain containing T cell activation inhibitor 1               |
| 320485    | 16.68                                      | 131.30                                                                                          | 2.98                                                                                                                                 | 3.37E-29     | Up                 | 3.51E-31    | B230312C02Rik | RIKEN cDNA B230312C02 gene                                          |
| 17075     | 2.09                                       | 16.02                                                                                           | 2.94                                                                                                                                 | 1.04E-06     | Up                 | 4.64E-08    | Epcam         | epithelial cell adhesion molecule                                   |
| 100303644 | 4.88                                       | 36.99                                                                                           | 2.92                                                                                                                                 | 2.74E-10     | Up                 | 8.19E-12    | C130080G10Rik | RIKEN cDNA C130080G10 gene                                          |
| 74747     | 105.29                                     | 735.92                                                                                          | 2.81                                                                                                                                 | 1.54E-141    | Up                 | 2.22E-144   | Ddit4         | DNA-damage-inducible transcript 4                                   |
| 619547    | 63.91                                      | 439.29                                                                                          | 2.78                                                                                                                                 | 7.72E-81     | Up                 | 2.40E-83    | Rpl34-ps1     | ribosomal protein L34, pseudogene 1                                 |
| 80797     | 2.27                                       | 15.23                                                                                           | 2.74                                                                                                                                 | 3.95E-06     | Up                 | 1.92E-07    | Clca2         | chloride channel calcium activated 2                                |
| 17841     | 2.24                                       | 14.25                                                                                           | 2.67                                                                                                                                 | 9.88E-06     | Up                 | 5.02E-07    | Mup2          | major urinary protein 2                                             |
| 11464     | 1847.73                                    | 11610.65                                                                                        | 2.65                                                                                                                                 | 0            | Up                 | 0           | Actc1         | actin, alpha, cardiac muscle 1                                      |
| 14955     | 1937.50                                    | 11885.76                                                                                        | 2.62                                                                                                                                 | 0            | Up                 | 0           | H19           | H19 fetal liver mRNA                                                |
| 20533     | 2.56                                       | 15.54                                                                                           | 2.60                                                                                                                                 | 1.00E-05     | Up                 | 5.09E-07    | Slc4a1        | solute carrier family 4 (anion exchanger), member 1                 |
| 110310    | 1.87                                       | 10.87                                                                                           | 2.54                                                                                                                                 | 6.65E-05     | Up                 | 3.93E-06    | Krt7          | keratin 7                                                           |
| 15375     | 1.48                                       | 8.34                                                                                            | 2.50                                                                                                                                 | 0.000146578  | Up                 | 9.32E-06    | Foxa1         | forkhead box A1                                                     |
| 18115     | 417.24                                     | 2351.54                                                                                         | 2.49                                                                                                                                 | 0            | Up                 | 0           | Nnt           | nicotinamide nucleotide transhydrogenase                            |
| 104816    | 1.82                                       | 10.23                                                                                           | 2.49                                                                                                                                 | 0.000101422  | Up                 | 6.28E-06    | Aspg          | asparaginase homolog (S. cerevisiae)                                |
| 110308    | 1.49                                       | 8.33                                                                                            | 2.48                                                                                                                                 | 0.000163643  | Up                 | 1.06E-05    | Krt5          | keratin 5                                                           |
| 11830     | 1.46                                       | 8.05                                                                                            | 2.47                                                                                                                                 | 0.000182591  | Up                 | 1.19E-05    | Aqp5          | aquaporin 5                                                         |
| 12814     | 10.21                                      | 55.06                                                                                           | 2.43                                                                                                                                 | 2.35E-11     | Up                 | 6.34E-13    | Col11a1       | collagen, type XI, alpha 1                                          |
| 68162     | 7.22                                       | 38.49                                                                                           | 2.41                                                                                                                                 | 1.85E-08     | Up                 | 6.90E-10    | A930003A15Rik | RIKEN cDNA A930003A15 gene                                          |
| 100040724 | 4.68                                       | 24.80                                                                                           | 2.40                                                                                                                                 | 2.12E-06     | Up                 | 9.93E-08    | Mirg          | miRNA containing gene                                               |
| 100039028 | 5.75                                       | 30.39                                                                                           | 2.40                                                                                                                                 | 0.00026057   | Up                 | 1.77E-05    | Mup11         | major urinary protein 11                                            |
| 68709     | 20.66                                      | 108.60                                                                                          | 2.39                                                                                                                                 | 1.20E-19     | Up                 | 1.90E-21    | Cilp2         | cartilage intermediate layer protein 2                              |
| 16669     | 13.34                                      | 69.58                                                                                           | 2.38                                                                                                                                 | 3.42E-13     | Up                 | 8.00E-15    | Krt19         | keratin 19                                                          |
| 170439    | 38.91                                      | 199.36                                                                                          | 2.36                                                                                                                                 | 1.57E-34     | Up                 | 1.36E-36    | Elovl6        | ELOVL family member 6, elongation of long chain fatty acids (yeast) |
| 16545     | 28.04                                      | 136.73                                                                                          | 2.29                                                                                                                                 | 6.20E-23     | Up                 | 8.26E-25    | Kera          | keratocan                                                           |
| 20677     | 25.72                                      | 125.28                                                                                          | 2.28                                                                                                                                 | 4.75E-21     | Up                 | 6.87E-23    | Sox4          | SRY-box containing gene 4                                           |
| 100647    | 1.74                                       | 8.42                                                                                            | 2.28                                                                                                                                 | 0.000602838  | Up                 | 4.43E-05    | Upk3b         | uroplakin 3B                                                        |
| 26458     | 3.51                                       | 16.65                                                                                           | 2.25                                                                                                                                 | 8.03E-05     | Up                 | 4.84E-06    | Slc27a2       | solute carrier family 27 (fatty acid transporter), member 2         |
| 17748     | 140.45                                     | 649.27                                                                                          | 2.21                                                                                                                                 | 2.03E-95     | Up                 | 4.79E-98    | Mt1           | metallothionein 1                                                   |
| 12813     | 1.35                                       | 6.24                                                                                            | 2.20                                                                                                                                 | 0.001264617  | Up                 | 0.000100458 | Col10a1       | collagen, type X, alpha 1                                           |
| 11595     | 1.42                                       | 6.51                                                                                            | 2.20                                                                                                                                 | 0.001340287  | Up                 | 0.000106935 | Acan          | aggrecan                                                            |
| 403183    | 16.65                                      | 75.80                                                                                           | 2.19                                                                                                                                 | 1.66E-13     | Up                 | 3.77E-15    | Mettl21e      | methyltransferase like 21E                                          |
| 20856     | 10.43                                      | 46.74                                                                                           | 2.16                                                                                                                                 | 5.96E-09     | Up                 | 2.07E-10    | Stc2          | stanniocalcin 2                                                     |
| 12739     | 1.33                                       | 5.95                                                                                            | 2.16                                                                                                                                 | 0.001668747  | Up                 | 0.000136794 | Cldn3         | claudin 3                                                           |
| 12740     | 1.45                                       | 6.47                                                                                            | 2.16                                                                                                                                 | 0.001708871  | Up                 | 0.000140378 | Cldn4         | claudin 4                                                           |
| 19116     | 9.77                                       | 42.69                                                                                           | 2.13                                                                                                                                 | 3.98E-08     | Up                 | 1.52E-09    | Prlr          | prolactin receptor                                                  |
| 17263     | 152.61                                     | 663.93                                                                                          | 2.12                                                                                                                                 | 1.23E-29     | Up                 | 1.27E-31    | Meg3          | maternally expressed 3                                              |
| 16668     | 8.73                                       | 37.87                                                                                           | 2.12                                                                                                                                 | 3.16E-07     | Up                 | 1.33E-08    | Krt18         | keratin 18                                                          |

|           |         |         |      |             |    |             |          |                                                                                                |
|-----------|---------|---------|------|-------------|----|-------------|----------|------------------------------------------------------------------------------------------------|
| 327959    | 24.94   | 107.64  | 2.11 | 7.73E-17    | Up | 1.41E-18    | Xaf1     | XIAP associated factor 1                                                                       |
| 18667     | 1.31    | 5.65    | 2.10 | 0.002442895 | Up | 0.000210393 | Pgr      | progesterone receptor                                                                          |
| 12841     | 1.70    | 7.19    | 2.08 | 0.002494216 | Up | 0.000215244 | Col9a3   | collagen, type IX, alpha 3                                                                     |
| 50528     | 1.65    | 6.91    | 2.06 | 0.002796706 | Up | 0.000244623 | Tmprss2  | transmembrane protease, serine 2                                                               |
| 230775    | 3.48    | 14.52   | 2.06 | 0.000526916 | Up | 3.83E-05    | Bai2     | brain-specific angiogenesis inhibitor 2                                                        |
| 12096     | 1.29    | 5.36    | 2.05 | 0.003339711 | Up | 0.00029899  | Bglap    | bone gamma carboxylglutamate protein                                                           |
| 105171    | 280.10  | 1142.32 | 2.03 | 2.10E-147   | Up | 2.67E-150   | Arrdc3   | arrestin domain containing 3                                                                   |
| 100040972 | 101.33  | 411.81  | 2.02 | 7.43E-57    | Up | 3.47E-59    | Tceal7   | transcription elongation factor A (SII)-like 7                                                 |
| 16664     | 1.26    | 5.07    | 2.01 | 0.004303334 | Up | 0.00039915  | Krt14    | keratin 14                                                                                     |
| 12683     | 16.21   | 65.01   | 2.00 | 2.04E-10    | Up | 5.99E-12    | Cidea    | cell death-inducing DNA fragmentation factor, alpha subunit-like effector A                    |
| 14462     | 2.36    | 9.39    | 1.99 | 0.00293865  | Up | 0.000259019 | Gata3    | GATA binding protein 3                                                                         |
| 12609     | 232.82  | 919.03  | 1.98 | 2.61E-119   | Up | 4.52E-122   | Cebpd    | CCAAT/enhancer binding protein (C/EBP), delta                                                  |
| 67701     | 1.61    | 6.32    | 1.97 | 0.00499052  | Up | 0.000474973 | Wfdc2    | WAP four-disulfide core domain 2                                                               |
| 268709    | 27.42   | 106.51  | 1.96 | 1.43E-14    | Up | 2.98E-16    | Fam107a  | family with sequence similarity 107, member A                                                  |
| 12705     | 2.34    | 9.10    | 1.96 | 0.003706123 | Up | 0.000337561 | Cited1   | Cbp/p300-interacting transactivator with Glu/Asp-rich carboxy-terminal domain 1                |
| 329278    | 1.66    | 6.33    | 1.93 | 0.006502372 | Up | 0.000641413 | Tnn      | tenascin N                                                                                     |
| 110935    | 1.26    | 4.77    | 1.92 | 0.006969518 | Up | 0.00069426  | Atp6v1b1 | ATPase, H+ transporting, lysosomal V1 subunit B1                                               |
| 271424    | 176.89  | 669.30  | 1.92 | 5.28E-85    | Up | 1.40E-87    | Ip6k3    | inositol hexaphosphate kinase 3                                                                |
| 242022    | 6.82    | 25.62   | 1.91 | 5.97E-05    | Up | 3.49E-06    | Frem2    | Fras1 related extracellular matrix protein 2                                                   |
| 105404    | 2.62    | 9.78    | 1.90 | 0.004034632 | Up | 0.000370399 | BB123696 | expressed sequence BB123696                                                                    |
| 11839     | 1.28    | 4.74    | 1.89 | 0.008227995 | Up | 0.000844286 | Areg     | amphiregulin                                                                                   |
| 15129     | 292.04  | 1079.54 | 1.89 | 1.00E-112   | Up | 1.91E-115   | Hbb-b1   | hemoglobin, beta adult major chain                                                             |
| 244810    | 4.42    | 15.89   | 1.85 | 0.001364369 | Up | 0.000109011 | AW551984 | expressed sequence AW551984                                                                    |
| 223838    | 15.08   | 53.77   | 1.83 | 4.36E-08    | Up | 1.67E-09    | Adams20  | a disintegrin-like and metallopeptidase (reprolysin type) with thrombospondin type 1 motif, 20 |
| 18491     | 3.67    | 12.95   | 1.82 | 0.003404782 | Up | 0.000306385 | Pappa    | pregnancy-associated plasma protein A                                                          |
| 100503605 | 1432.50 | 5010.93 | 1.81 | 3.71E-112   | Up | 7.26E-115   | Beta-s   | hemoglobin subunit beta-1-like                                                                 |
| 17691     | 237.31  | 819.78  | 1.79 | 4.41E-94    | Up | 1.07E-96    | Sik1     | salt inducible kinase 1                                                                        |
| 20617     | 12.03   | 41.47   | 1.79 | 3.57E-06    | Up | 1.73E-07    | Snca     | synuclein, alpha                                                                               |
| 17883     | 25.30   | 86.82   | 1.78 | 2.41E-11    | Up | 6.53E-13    | Myh3     | myosin, heavy polypeptide 3, skeletal muscle, embryonic                                        |
| 53311     | 1468.22 | 5033.64 | 1.78 | 0           | Up | 0           | Mybph    | myosin binding protein H                                                                       |
| 13711     | 1.15    | 3.91    | 1.76 | 0.015874483 | Up | 0.001827483 | Elf5     | E74-like factor 5                                                                              |
| 109620    | 1.89    | 6.38    | 1.75 | 0.015667286 | Up | 0.001798211 | Dsp      | desmoplakin                                                                                    |
| 12818     | 95.99   | 322.87  | 1.75 | 1.81E-37    | Up | 1.38E-39    | Col14a1  | collagen, type XIV, alpha 1                                                                    |
| 17002     | 1.91    | 6.41    | 1.75 | 0.016173876 | Up | 0.001865679 | Lif      | lactotransferrin                                                                               |
| 16372     | 2.57    | 8.63    | 1.74 | 0.011419113 | Up | 0.001234267 | Irx2     | Iroquois related homeobox 2 (Drosophila)                                                       |
| 109151    | 188.27  | 630.47  | 1.74 | 7.14E-64    | Up | 3.04E-66    | Chd9     | chromodomain helicase DNA binding protein 9                                                    |
| 11656     | 80.61   | 263.61  | 1.71 | 6.14E-30    | Up | 6.23E-32    | Alas2    | aminolevulinic acid synthase 2, erythroid                                                      |
| 240327    | 2.93    | 9.55    | 1.70 | 0.01227173  | Up | 0.001347648 | Gm4951   | predicted gene 4951                                                                            |
| 140474    | 4.03    | 13.10   | 1.70 | 0.006390157 | Up | 0.000627707 | Muc4     | mucin 4                                                                                        |
| 21420     | 1.12    | 3.63    | 1.69 | 0.021969819 | Up | 0.002673925 | Tfap2c   | transcription factor AP-2, gamma                                                               |
| 241727    | 9.49    | 30.62   | 1.69 | 0.000174832 | Up | 1.14E-05    | Snph     | syntaphilin                                                                                    |
| 237091    | 1.13    | 3.62    | 1.69 | 0.022266144 | Up | 0.002717324 | Lhfpl1   | lipoma HMGIC fusion partner-like 1                                                             |
| 140709    | 3.67    | 11.80   | 1.69 | 0.00887865  | Up | 0.000926917 | Col26a1  | collagen, type XXVI, alpha 1                                                                   |
| 18787     | 49.11   | 157.67  | 1.68 | 1.05E-17    | Up | 1.82E-19    | Serpine1 | serine (or cysteine) peptidase inhibitor, clade E, member 1                                    |
| 110257    | 1318.85 | 4204.57 | 1.67 | 3.51E-275   | Up | 2.63E-278   | Hba-a2   | hemoglobin alpha, adult chain 2                                                                |
| 114479    | 2.21    | 7.02    | 1.67 | 0.022266781 | Up | 0.002718686 | Slc5a5   | solute carrier family 5 (sodium iodide symporter), member 5                                    |
| 11639     | 37.54   | 118.57  | 1.66 | 3.17E-13    | Up | 7.40E-15    | Ak4      | adenylate kinase 4                                                                             |
| 53412     | 2270.60 | 7086.30 | 1.64 | 0           | Up | 0           | Ppp1r3c  | protein phosphatase 1, regulatory (inhibitor) subunit 3C                                       |
| 73149     | 4.62    | 14.37   | 1.64 | 0.006138996 | Up | 0.000598788 | Clec4a3  | C-type lectin domain family 4, member a3                                                       |
| 12842     | 1191.30 | 3691.28 | 1.63 | 0           | Up | 0           | Col1a1   | collagen, type I, alpha 1                                                                      |
| 22097     | 1.17    | 3.58    | 1.61 | 0.03028541  | Up | 0.003922944 | Tsix     | X (inactive)-specific transcript, antisense                                                    |
| 140742    | 165.06  | 504.35  | 1.61 | 2.55E-51    | Up | 1.37E-53    | Sesn1    | sestrin 1                                                                                      |
| 15122     | 2170.40 | 6626.41 | 1.61 | 0           | Up | 0           | Hba-a1   | hemoglobin alpha, adult chain 1                                                                |
| 12816     | 60.28   | 182.56  | 1.60 | 1.34E-19    | Up | 2.13E-21    | Col12a1  | collagen, type XII, alpha 1                                                                    |
| 72169     | 1.50    | 4.53    | 1.60 | 0.036224623 | Up | 0.00488856  | Trim29   | tripartite motif-containing 29                                                                 |
| 56458     | 302.87  | 915.53  | 1.60 | 5.10E-86    | Up | 1.32E-88    | Foxo1    | forkhead box O1                                                                                |
| 11695     | 7.39    | 22.34   | 1.60 | 0.001371213 | Up | 0.000109637 | Alx4     | aristaless-like homeobox 4                                                                     |
| 12805     | 2.56    | 7.68    | 1.58 | 0.030335713 | Up | 0.003931209 | Cntn1    | contactin 1                                                                                    |
| 16819     | 4.22    | 12.49   | 1.57 | 0.012949871 | Up | 0.001431824 | Lcn2     | lipocalin 2                                                                                    |
| 13447     | 5.29    | 15.61   | 1.56 | 0.008186011 | Up | 0.000838562 | Doc2b    | double C2, beta                                                                                |
| 81799     | 4.59    | 13.47   | 1.55 | 0.012043719 | Up | 0.001319831 | C1qtnf3  | C1q and tumor necrosis factor related protein 3                                                |
| 66139     | 1.05    | 3.07    | 1.55 | 0.039742953 | Up | 0.005471042 | Tmem8c   | transmembrane protein 8C                                                                       |
| 14038     | 1.05    | 3.07    | 1.55 | 0.039852485 | Up | 0.005490715 | Wfdc18   | WAP four-disulfide core domain 18                                                              |

|           |         |         |      |             |    |             |               |                                                                                                   |
|-----------|---------|---------|------|-------------|----|-------------|---------------|---------------------------------------------------------------------------------------------------|
| 24117     | 8.41    | 24.52   | 1.54 | 0.001415924 | Up | 0.00011362  | Wif1          | Wnt inhibitory factor 1                                                                           |
| 13371     | 18.24   | 53.10   | 1.54 | 1.46E-05    | Up | 7.61E-07    | Dio2          | deiodinase, iodothyronine, type II                                                                |
| 22402     | 3.96    | 11.52   | 1.54 | 0.020852057 | Up | 0.002515902 | Wisp1         | WNT1 inducible signaling pathway protein 1                                                        |
| 14104     | 1714.37 | 4937.98 | 1.53 | 0           | Up | 0           | Fasn          | fatty acid synthase                                                                               |
| 277468    | 1.39    | 4.00    | 1.52 | 0.04994523  | Up | 0.007260924 | Slc39a12      | solute carrier family 39 (zinc transporter), member 12                                            |
| 16364     | 44.45   | 127.38  | 1.52 | 5.79E-13    | Up | 1.38E-14    | Irf4          | interferon regulatory factor 4                                                                    |
| 12643     | 92.47   | 262.88  | 1.51 | 2.65E-24    | Up | 3.35E-26    | Chad          | chondroadherin                                                                                    |
| 19143     | 3.54    | 10.04   | 1.51 | 0.027754812 | Up | 0.003540751 | St14          | suppression of tumorigenicity 14 (colon carcinoma)                                                |
| 20739     | 2.54    | 7.19    | 1.50 | 0.043982208 | Up | 0.006191535 | Spta1         | spectrin alpha, erythrocytic 1                                                                    |
| 100042149 | 1.08    | 3.03    | 1.49 | 0.049263562 | Up | 0.007130962 | Gm3696        | predicted gene 3696                                                                               |
| 75104     | 1.08    | 3.03    | 1.49 | 0.04933417  | Up | 0.007146871 | Mmd2          | monocyte to macrophage differentiation-associated 2                                               |
| 14264     | 697.54  | 1949.32 | 1.48 | 2.46E-155   | Up | 2.70E-158   | Fmod          | fibromodulin                                                                                      |
| 12845     | 47.14   | 131.43  | 1.48 | 8.44E-13    | Up | 2.03E-14    | Comp          | cartilage oligomeric matrix protein                                                               |
| 320563    | 16.52   | 45.89   | 1.47 | 4.02E-05    | Up | 2.30E-06    | Islr2         | immunoglobulin superfamily containing leucine-rich repeat 2                                       |
| 11539     | 243.66  | 675.18  | 1.47 | 6.07E-54    | Up | 2.98E-56    | Adora1        | adenosine A1 receptor                                                                             |
| 22695     | 168.18  | 463.97  | 1.46 | 2.86E-41    | Up | 1.89E-43    | Zfp36         | zinc finger protein 36                                                                            |
| 76293     | 52.14   | 141.95  | 1.44 | 8.92E-13    | Up | 2.15E-14    | Mfap4         | microfibrillar-associated protein 4                                                               |
| 15200     | 61.56   | 167.11  | 1.44 | 1.22E-15    | Up | 2.38E-17    | Hbegf         | heparin-binding EGF-like growth factor                                                            |
| 106369    | 5.57    | 15.10   | 1.44 | 0.015907025 | Up | 0.001832146 | Ypel1         | yippee-like 1 (Drosophila)                                                                        |
| 56838     | 9.75    | 26.43   | 1.44 | 0.002434258 | Up | 0.000209228 | Ccl28         | chemokine (C-C motif) ligand 28                                                                   |
| 16527     | 21.62   | 57.92   | 1.42 | 5.23E-06    | Up | 2.57E-07    | Kcnk3         | potassium channel, subfamily K, member 3                                                          |
| 67606     | 53.16   | 142.40  | 1.42 | 3.98E-13    | Up | 9.35E-15    | Fibin         | fin bud initiation factor homolog (zebrafish)                                                     |
| 433938    | 424.85  | 1132.75 | 1.41 | 2.70E-87    | Up | 6.84E-90    | Mn1           | meningioma 1                                                                                      |
| 14783     | 320.75  | 849.96  | 1.41 | 7.93E-67    | Up | 3.20E-69    | Grb10         | growth factor receptor bound protein 10                                                           |
| 330119    | 7.26    | 19.23   | 1.40 | 0.009058669 | Up | 0.000948996 | Adamts3       | a disintegrin-like and metalloproteinase (reprolysin type) with thrombospondin type 1 motif, 3    |
| 20255     | 9.43    | 24.55   | 1.38 | 0.006060324 | Up | 0.000589368 | Scg3          | secretogranin III                                                                                 |
| 93761     | 26.75   | 69.27   | 1.37 | 1.65E-06    | Up | 7.63E-08    | Smarca1       | SWI/SNF related, matrix associated, actin dependent regulator of chromatin, subfamily a, member 1 |
| 13587     | 4.14    | 10.71   | 1.37 | 0.046031968 | Up | 0.006543427 | Ear2          | eosinophil-associated, ribonuclease A family, member 2                                            |
| 631323    | 4.93    | 12.67   | 1.36 | 0.036950475 | Up | 0.005014205 | Gm12250       | predicted gene 12250                                                                              |
| 171531    | 9.00    | 23.07   | 1.36 | 0.00615032  | Up | 0.000600921 | Mlph          | melanophilin                                                                                      |
| 232493    | 6.78    | 17.37   | 1.36 | 0.020991652 | Up | 0.002535165 | Gys2          | glycogen synthase 2                                                                               |
| 13052     | 8.78    | 22.49   | 1.36 | 0.007909625 | Up | 0.000804778 | Cxadr         | coxsackievirus and adenovirus receptor                                                            |
| 21906     | 7.19    | 18.29   | 1.35 | 0.014747871 | Up | 0.00166633  | Otop1         | otopetrin 1                                                                                       |
| 12608     | 485.96  | 1233.77 | 1.34 | 1.34E-83    | Up | 3.77E-86    | Cebpb         | CCAAT/enhancer binding protein (C/EBP), beta                                                      |
| 74155     | 459.42  | 1156.49 | 1.33 | 1.18E-82    | Up | 3.47E-85    | Errf1         | ERBB receptor feedback inhibitor 1                                                                |
| 227731    | 988.31  | 2476.19 | 1.33 | 2.77E-161   | Up | 2.87E-164   | Slc25a25      | solute carrier family 25 (mitochondrial carrier, phosphate carrier), member 25                    |
| 107581    | 45.42   | 113.76  | 1.32 | 4.36E-09    | Up | 1.48E-10    | Col16a1       | collagen, type XVI, alpha 1                                                                       |
| 14260     | 4.42    | 11.08   | 1.32 | 0.04934311  | Up | 0.00715101  | Fmn1          | formin 1                                                                                          |
| 14229     | 270.06  | 676.19  | 1.32 | 3.13E-48    | Up | 1.75E-50    | Fkbp5         | FK506 binding protein 5                                                                           |
| 50934     | 166.37  | 413.63  | 1.31 | 6.49E-31    | Up | 6.40E-33    | Slc7a8        | solute carrier family 7 (cationic amino acid transporter, y+ system), member 8                    |
| 213393    | 168.11  | 417.65  | 1.31 | 1.51E-28    | Up | 1.63E-30    | 8430408G22Rik | RIKEN cDNA 8430408G22 gene                                                                        |
| 70807     | 589.86  | 1463.81 | 1.31 | 2.45E-93    | Up | 6.06E-96    | Aradc2        | arrestin domain containing 2                                                                      |
| 20927     | 18.78   | 46.29   | 1.30 | 0.000193471 | Up | 1.27E-05    | Abcc8         | ATP-binding cassette, sub-family C (CFTR/MRP), member 8                                           |
| 55963     | 5.16    | 12.70   | 1.30 | 0.045165656 | Up | 0.006391981 | Slc1a4        | solute carrier family 1 (glutamate/neutral amino acid transporter), member 4                      |
| 226438    | 509.26  | 1250.34 | 1.30 | 4.65E-83    | Up | 1.34E-85    | Igfn1         | immunoglobulin-like and fibronectin type III domain containing 1                                  |
| 12267     | 7.26    | 17.76   | 1.29 | 0.022348059 | Up | 0.002731186 | C3ar1         | complement component 3a receptor 1                                                                |
| 53422     | 60.57   | 147.96  | 1.29 | 1.13E-11    | Up | 2.97E-13    | Ybx2          | Y box protein 2                                                                                   |
| 17207     | 152.85  | 371.93  | 1.28 | 2.60E-27    | Up | 2.95E-29    | Mcf2l         | mcf.2 transforming sequence-like                                                                  |
| 12843     | 1753.97 | 4235.48 | 1.27 | 2.45E-197   | Up | 2.40E-200   | Col1a2        | collagen, type I, alpha 2                                                                         |
| 12575     | 195.58  | 472.04  | 1.27 | 2.55E-33    | Up | 2.26E-35    | Cdkn1a        | cyclin-dependent kinase inhibitor 1A (P21)                                                        |
| 16658     | 244.94  | 590.92  | 1.27 | 6.89E-40    | Up | 4.80E-42    | Maib          | v-maf musculoaponeurotic fibrosarcoma oncogene family, protein B (avian)                          |
| 99151     | 27.91   | 67.25   | 1.27 | 1.46E-05    | Up | 7.62E-07    | Cercam        | cerebral endothelial cell adhesion molecule                                                       |
| 13653     | 116.24  | 279.14  | 1.26 | 2.37E-20    | Up | 3.57E-22    | Egr1          | early growth response 1                                                                           |
| 64899     | 29.38   | 70.47   | 1.26 | 1.24E-05    | Up | 6.42E-07    | Lpin3         | lipin 3                                                                                           |
| 14183     | 12.44   | 29.80   | 1.26 | 0.004191648 | Up | 0.000387583 | Fgfr2         | fibroblast growth factor receptor 2                                                               |
| 52331     | 247.22  | 588.40  | 1.25 | 4.99E-40    | Up | 3.42E-42    | Stbd1         | starch binding domain 1                                                                           |
| 268903    | 99.23   | 235.96  | 1.25 | 4.30E-16    | Up | 8.11E-18    | Nrip1         | nuclear receptor interacting protein 1                                                            |
| 19242     | 8.55    | 20.27   | 1.25 | 0.019185043 | Up | 0.002268319 | Ptn           | pleiotrophin                                                                                      |
| 19716     | 56.75   | 134.40  | 1.24 | 7.10E-10    | Up | 2.23E-11    | Bex1          | brain expressed gene 1                                                                            |
| 21648     | 104.68  | 246.38  | 1.23 | 0.002388083 | Up | 0.000204763 | Dynl1b        | dynein light chain 1ctex-type 1B                                                                  |
| 21923     | 49.94   | 117.53  | 1.23 | 4.11E-08    | Up | 1.57E-09    | Tnc           | tenascin C                                                                                        |
| 19735     | 66.25   | 155.49  | 1.23 | 1.60E-10    | Up | 4.59E-12    | Rgs2          | regulator of G-protein signaling 2                                                                |
| 22390     | 52.50   | 123.04  | 1.23 | 4.38E-09    | Up | 1.49E-10    | Wee1          | WEE 1 homolog 1 (S. pombe)                                                                        |

|           |         |          |      |             |    |             |               |                                                                                               |
|-----------|---------|----------|------|-------------|----|-------------|---------------|-----------------------------------------------------------------------------------------------|
| 666945    | 20.44   | 47.85    | 1.23 | 0.000436881 | Up | 3.12E-05    | Gm10638       | predicted gene 10638                                                                          |
| 12825     | 2457.69 | 5752.00  | 1.23 | 7.70E-250   | Up | 6.21E-253   | Col3a1        | collagen, type III, alpha 1                                                                   |
| 244886    | 44.08   | 102.99   | 1.22 | 7.93E-08    | Up | 3.14E-09    | Al118078      | expressed sequence Al118078                                                                   |
| 50706     | 193.96  | 452.87   | 1.22 | 1.80E-29    | Up | 1.87E-31    | Postn         | periostin, osteoblast specific factor                                                         |
| 12835     | 648.68  | 1502.47  | 1.21 | 4.26E-84    | Up | 1.18E-86    | Col6a3        | collagen, type VI, alpha 3                                                                    |
| 633640    | 253.34  | 586.45   | 1.21 | 1.09E-36    | Up | 8.54E-39    | Gm7120        | predicted gene 7120                                                                           |
| 654812    | 117.48  | 271.84   | 1.21 | 8.53E-19    | Up | 1.41E-20    | Angptl7       | angiopoietin-like 7                                                                           |
| 547127    | 81.91   | 189.45   | 1.21 | 1.67E-13    | Up | 3.80E-15    | Tmem181b-ps   | transmembrane protein 181B, pseudogene                                                        |
| 18742     | 19.08   | 43.93    | 1.20 | 0.001595151 | Up | 0.000129657 | Pitx3         | paired-like homeodomain transcription factor 3                                                |
| 23984     | 32.63   | 74.82    | 1.20 | 1.11E-05    | Up | 5.68E-07    | Pde10a        | phosphodiesterase 10A                                                                         |
| 228966    | 30.84   | 70.37    | 1.19 | 2.34E-05    | Up | 1.27E-06    | Ppp1r3d       | protein phosphatase 1, regulatory subunit 3D                                                  |
| 26432     | 45.74   | 104.11   | 1.19 | 3.36E-07    | Up | 1.42E-08    | Plod2         | procollagen lysine, 2-oxoglutarate 5-dioxygenase 2                                            |
| 382427    | 132.69  | 301.51   | 1.18 | 4.37E-19    | Up | 7.11E-21    | Best3         | bestrophin 3                                                                                  |
| 64103     | 29.06   | 65.93    | 1.18 | 4.75E-05    | Up | 2.74E-06    | Tnmd          | tenomodulin                                                                                   |
| 75750     | 17.54   | 39.60    | 1.18 | 0.002240685 | Up | 0.000189824 | Slc10a6       | solute carrier family 10 (sodium/bile acid cotransporter family), member 6                    |
| 233878    | 8.19    | 18.47    | 1.17 | 0.035245005 | Up | 0.004731978 | Sez6l2        | seizure related 6 homolog like 2                                                              |
| 14219     | 275.48  | 620.29   | 1.17 | 1.63E-31    | Up | 1.53E-33    | Ctgf          | connective tissue growth factor                                                               |
| 60599     | 142.98  | 321.89   | 1.17 | 1.83E-20    | Up | 2.72E-22    | Trp53inp1     | transformation related protein 53 inducible nuclear protein 1                                 |
| 23956     | 110.31  | 247.70   | 1.17 | 2.57E-15    | Up | 5.12E-17    | Neu2          | neuraminidase 2                                                                               |
| 71481     | 19.02   | 42.54    | 1.16 | 0.001609109 | Up | 0.00013107  | Alpk1         | alpha-kinase 1                                                                                |
| 246048    | 40.50   | 89.99    | 1.15 | 2.33E-06    | Up | 1.10E-07    | Chodl         | chondrolectin                                                                                 |
| 12514     | 28.38   | 62.83    | 1.15 | 0.000115847 | Up | 7.24E-06    | Cd68          | CD68 antigen                                                                                  |
| 14664     | 72.00   | 159.29   | 1.15 | 7.50E-10    | Up | 2.35E-11    | Slc6a9        | solute carrier family 6 (neurotransmitter transporter, glycine), member 9                     |
| 17150     | 16.82   | 37.21    | 1.15 | 0.005570868 | Up | 0.000537593 | Mfap2         | microfibrillar-associated protein 2                                                           |
| 100503043 | 120.43  | 265.99   | 1.14 | 9.61E-16    | Up | 1.86E-17    | Armcx4        | armadillo repeat containing, X-linked 4                                                       |
| 231633    | 15.75   | 34.78    | 1.14 | 0.007279352 | Up | 0.00072932  | Tmem119       | transmembrane protein 119                                                                     |
| 23831     | 225.55  | 497.38   | 1.14 | 2.27E-28    | Up | 2.47E-30    | Car14         | carbonic anhydrase 14                                                                         |
| 244416    | 10.63   | 23.44    | 1.14 | 0.029695722 | Up | 0.003834578 | Ppp1r3b       | protein phosphatase 1, regulatory (inhibitor) subunit 3B                                      |
| 269423    | 38.99   | 85.93    | 1.14 | 1.79E-05    | Up | 9.55E-07    | 3110057O12Rik | RIKEN cDNA 3110057O12 gene                                                                    |
| 14933     | 13.42   | 29.56    | 1.14 | 0.010849762 | Up | 0.001163346 | Gyk           | glycerol kinase                                                                               |
| 77794     | 17.60   | 38.75    | 1.14 | 0.003313453 | Up | 0.000296115 | Adamtsl2      | ADAMTS-like 2                                                                                 |
| 18563     | 1512.48 | 3328.91  | 1.14 | 5.12E-145   | Up | 6.79E-148   | Pcx           | pyruvate carboxylase                                                                          |
| 259302    | 18.15   | 39.61    | 1.13 | 0.003370117 | Up | 0.000302294 | Srgap3        | SLIT-ROBO Rho GTPase activating protein 3                                                     |
| 226691    | 98.29   | 214.45   | 1.13 | 5.82E-13    | Up | 1.39E-14    | Al607873      | expressed sequence Al607873                                                                   |
| 12700     | 197.07  | 427.20   | 1.12 | 4.59E-20    | Up | 7.15E-22    | Cish          | cytokine inducible SH2-containing protein                                                     |
| 21952     | 611.68  | 1323.32  | 1.11 | 1.32E-69    | Up | 4.96E-72    | Tnni1         | troponin I, skeletal, slow 1                                                                  |
| 56847     | 17.98   | 38.82    | 1.11 | 0.003981597 | Up | 0.000364259 | Aldh1a3       | aldehyde dehydrogenase family 1, subfamily A3                                                 |
| 329941    | 13.37   | 28.81    | 1.11 | 0.020719135 | Up | 0.00249867  | Col8a2        | collagen, type VIII, alpha 2                                                                  |
| 12227     | 218.76  | 470.94   | 1.11 | 2.75E-26    | Up | 3.20E-28    | Btg2          | B cell translocation gene 2, anti-proliferative                                               |
| 99439     | 9.21    | 19.77    | 1.10 | 0.047568871 | Up | 0.006822583 | Duox1         | dual oxidase 1                                                                                |
| 234593    | 20.05   | 42.89    | 1.10 | 0.003038853 | Up | 0.000268551 | Ndr4          | N-myc downstream regulated gene 4                                                             |
| 66402     | 32.67   | 69.89    | 1.10 | 0.000147488 | Up | 9.43E-06    | Sln           | sarcolipin                                                                                    |
| 226695    | 101.73  | 217.61   | 1.10 | 1.21E-12    | Up | 2.95E-14    | Ifi205        | interferon activated gene 205                                                                 |
| 104099    | 70.38   | 150.50   | 1.10 | 4.06E-09    | Up | 1.38E-10    | Itga9         | integrin alpha 9                                                                              |
| 53608     | 98.22   | 209.48   | 1.09 | 1.82E-12    | Up | 4.49E-14    | Map3k6        | mitogen-activated protein kinase kinase kinase 6                                              |
| 231991    | 11.36   | 24.22    | 1.09 | 0.031951045 | Up | 0.004192113 | Creb5         | cAMP responsive element binding protein 5                                                     |
| 30806     | 9.82    | 20.91    | 1.09 | 0.048483401 | Up | 0.006995674 | Adamts8       | a disintegrin-like and metallopeptidase (reprolysin type) with thrombospondin type 1 motif, 8 |
| 56277     | 10.47   | 22.18    | 1.08 | 0.041873779 | Up | 0.005817479 | Tmem45a       | transmembrane protein 45a                                                                     |
| 12660     | 21.93   | 46.46    | 1.08 | 0.002674517 | Up | 0.000232654 | Chka          | choline kinase alpha                                                                          |
| 14172     | 9.97    | 21.11    | 1.08 | 0.043395874 | Up | 0.006083978 | Fgf18         | fibroblast growth factor 18                                                                   |
| 20425     | 71.99   | 152.19   | 1.08 | 9.94E-09    | Up | 3.58E-10    | Shmt1         | serine hydroxymethyltransferase 1 (soluble)                                                   |
| 18845     | 180.90  | 381.83   | 1.08 | 4.54E-20    | Up | 7.04E-22    | Pixna2        | plexin A2                                                                                     |
| 74646     | 101.47  | 214.03   | 1.08 | 1.20E-12    | Up | 2.92E-14    | Spsb1         | splA/ryanodine receptor domain and SOCS box containing 1                                      |
| 242050    | 41.11   | 86.53    | 1.07 | 1.78E-05    | Up | 9.46E-07    | Igslf10       | immunoglobulin superfamily, member 10                                                         |
| 319480    | 56.60   | 118.96   | 1.07 | 3.70E-07    | Up | 1.57E-08    | Itga11        | integrin alpha 11                                                                             |
| 20319     | 41.61   | 87.35    | 1.07 | 2.14E-05    | Up | 1.15E-06    | Sfrp2         | secreted frizzled-related protein 2                                                           |
| 140781    | 6677.92 | 13986.68 | 1.07 | 2.18E-290   | Up | 1.51E-293   | Myh7          | myosin, heavy polypeptide 7, cardiac muscle, beta                                             |
| 16002     | 206.84  | 432.08   | 1.06 | 1.68E-21    | Up | 2.41E-23    | Igf2          | insulin-like growth factor 2                                                                  |
| 18124     | 75.68   | 158.06   | 1.06 | 1.30E-08    | Up | 4.76E-10    | Nr4a3         | nuclear receptor subfamily 4, group A, member 3                                               |
| 208777    | 22.32   | 46.52    | 1.06 | 0.003272006 | Up | 0.000290853 | Sned1         | sushi, nidogen and EGF-like domains 1                                                         |
| 320997    | 64.67   | 134.64   | 1.06 | 5.42E-08    | Up | 2.11E-09    | Cyp4f39       | cytochrome P450, family 4, subfamily f, polypeptide 39                                        |
| 67573     | 16.63   | 34.61    | 1.06 | 0.015337066 | Up | 0.001755005 | Loxl4         | lysyl oxidase-like 4                                                                          |
| 69671     | 326.33  | 679.17   | 1.06 | 7.40E-33    | Up | 6.70E-35    | Tmem52        | transmembrane protein 52                                                                      |

|        |         |         |      |             |    |             |               |                                                                            |
|--------|---------|---------|------|-------------|----|-------------|---------------|----------------------------------------------------------------------------|
| 192657 | 250.03  | 519.71  | 1.06 | 5.46E-28    | Up | 6.04E-30    | Eil2          | elongation factor RNA polymerase II 2                                      |
| 56484  | 82.60   | 171.29  | 1.05 | 3.53E-09    | Up | 1.18E-10    | Foxo3         | forkhead box O3                                                            |
| 17060  | 28.93   | 59.95   | 1.05 | 0.000742012 | Up | 5.58E-05    | Blnk          | B cell linker                                                              |
| 13982  | 144.72  | 299.53  | 1.05 | 1.26E-15    | Up | 2.49E-17    | Esr1          | estrogen receptor 1 (alpha)                                                |
| 12832  | 297.64  | 613.06  | 1.04 | 4.20E-29    | Up | 4.41E-31    | Col5a2        | collagen, type V, alpha 2                                                  |
| 235320 | 321.94  | 660.30  | 1.04 | 9.96E-34    | Up | 8.78E-36    | Zbtb16        | zinc finger and BTB domain containing 16                                   |
| 15951  | 62.68   | 128.55  | 1.04 | 4.50E-07    | Up | 1.92E-08    | Ifi204        | interferon activated gene 204                                              |
| 329152 | 46.81   | 95.88   | 1.03 | 1.08E-05    | Up | 5.53E-07    | Hecw2         | HECT, C2 and WW domain containing E3 ubiquitin protein ligase 2            |
| 70625  | 80.25   | 164.25  | 1.03 | 1.22E-08    | Up | 4.46E-10    | Med26         | mediator complex subunit 26                                                |
| 381308 | 37.16   | 75.90   | 1.03 | 0.000171938 | Up | 1.12E-05    | Mnda          | myeloid cell nuclear differentiation antigen                               |
| 15529  | 169.76  | 346.65  | 1.03 | 1.42E-18    | Up | 2.35E-20    | Sdc2          | syndecan 2                                                                 |
| 98170  | 25.03   | 51.05   | 1.03 | 0.002295296 | Up | 0.000195564 | Tmem132a      | transmembrane protein 132A                                                 |
| 69368  | 87.62   | 178.74  | 1.03 | 7.89E-10    | Up | 2.49E-11    | Wdly1         | WD repeat and FYVE domain containing 1                                     |
| 18030  | 197.88  | 403.26  | 1.03 | 6.72E-21    | Up | 9.80E-23    | Nfil3         | nuclear factor, interleukin 3, regulated                                   |
| 81703  | 35.54   | 72.39   | 1.03 | 0.000149846 | Up | 9.61E-06    | Jdp2          | Jun dimerization protein 2                                                 |
| 12338  | 27.09   | 55.14   | 1.03 | 0.00183185  | Up | 0.000151642 | Capn6         | calpain 6                                                                  |
| 215418 | 58.32   | 118.69  | 1.03 | 1.14E-06    | Up | 5.12E-08    | Csmp1         | cysteine-serine-rich nuclear protein 1                                     |
| 331532 | 90.06   | 182.40  | 1.02 | 9.37E-10    | Up | 2.98E-11    | Tceal5        | transcription elongation factor A (SII)-like 5                             |
| 69590  | 50.53   | 102.18  | 1.02 | 6.57E-06    | Up | 3.27E-07    | Gpx8          | glutathione peroxidase 8 (putative)                                        |
| 21835  | 203.59  | 411.17  | 1.01 | 2.26E-20    | Up | 3.38E-22    | Thrsp         | thyroid hormone responsive                                                 |
| 791403 | 80.05   | 161.39  | 1.01 | 7.55E-09    | Up | 2.67E-10    | D830015G02Rik | RIKEN cDNA D830015G02 gene                                                 |
| 268481 | 19.91   | 40.09   | 1.01 | 0.008329793 | Up | 0.000858093 | Krt222        | keratin 222                                                                |
| 58994  | 31.13   | 62.62   | 1.01 | 0.000805031 | Up | 6.12E-05    | Smpd3         | sphingomyelin phosphodiesterase 3, neutral                                 |
| 57258  | 35.45   | 71.31   | 1.01 | 0.000504858 | Up | 3.65E-05    | Xpo4          | exportin 4                                                                 |
| 16007  | 211.93  | 425.69  | 1.01 | 1.82E-20    | Up | 2.69E-22    | Cyr61         | cysteine rich protein 61                                                   |
| 320878 | 991.03  | 1990.60 | 1.01 | 1.73E-81    | Up | 5.28E-84    | Mical2        | microtubule associated monooxygenase, calponin and LIM domain containing 2 |
| 17022  | 288.05  | 578.36  | 1.01 | 4.28E-26    | Up | 5.03E-28    | Lum           | lumican                                                                    |
| 14605  | 1713.87 | 3435.03 | 1.00 | 3.58E-117   | Up | 6.60E-120   | Tsc22d3       | TSC22 domain family, member 3                                              |
| 21826  | 168.92  | 338.55  | 1.00 | 3.12E-17    | Up | 5.56E-19    | Thbs2         | thrombospondin 2                                                           |

Supplemental Table 6S: List of differential expressed genes in gastrocnemius muscle from *Ctns*<sup>-/-</sup>+ 25(OH)D<sub>3</sub>+ 1,25(OH)<sub>2</sub>D<sub>3</sub> versus *Ctns*<sup>-/-</sup>+ Vehicle mice

| Gene ID   | Expression (Ctns <sup>-/-</sup> + Vehicle) | Expression (Ctns <sup>-/-</sup> + 25(OH)D <sub>3</sub> + 1,25(OH) <sub>2</sub> D <sub>3</sub> ) | log2 Fold Change (Ctns <sup>-/-</sup> + 25(OH)D <sub>3</sub> + 1,25(OH) <sub>2</sub> D <sub>3</sub> / Ctns <sup>-/-</sup> + Vehicle) | P - adjusted | Up/Down-Regulation | P value     | Symbol        | Description                                                                         |
|-----------|--------------------------------------------|-------------------------------------------------------------------------------------------------|--------------------------------------------------------------------------------------------------------------------------------------|--------------|--------------------|-------------|---------------|-------------------------------------------------------------------------------------|
| 67896     | 812.82                                     | 404.96                                                                                          | -1.01                                                                                                                                | 1.82E-32     | Down               | 1.68E-34    | Ccdc80        | coiled-coil domain containing 80                                                    |
| 67445     | 97.15                                      | 48.23                                                                                           | -1.01                                                                                                                                | 1.80E-05     | Down               | 9.61E-07    | C1qtnf4       | C1q and tumor necrosis factor related protein 4                                     |
| 19416     | 43.63                                      | 21.66                                                                                           | -1.01                                                                                                                                | 0.005637374  | Down               | 0.000544661 | Rasd1         | RAS, dexamethasone-induced 1                                                        |
| 67263     | 47.60                                      | 23.58                                                                                           | -1.01                                                                                                                                | 0.003426938  | Down               | 0.000308972 | Zswim6        | zinc finger SWIM-type containing 6                                                  |
| 17701     | 37.45                                      | 18.53                                                                                           | -1.02                                                                                                                                | 0.011526025  | Down               | 0.001249072 | Msx1          | homeobox, msh-like 1                                                                |
| 67212     | 206.84                                     | 101.14                                                                                          | -1.03                                                                                                                                | 5.13E-11     | Down               | 1.43E-12    | Mrpl55        | mitochondrial ribosomal protein L55                                                 |
| 22359     | 3498.64                                    | 1705.49                                                                                         | -1.04                                                                                                                                | 7.00E-137    | Down               | 1.09E-139   | Vldlr         | very low density lipoprotein receptor                                               |
| 56615     | 673.49                                     | 327.48                                                                                          | -1.04                                                                                                                                | 2.22E-26     | Down               | 2.55E-28    | Mgst1         | microsomal glutathione S-transferase 1                                              |
| 327958    | 56.98                                      | 27.70                                                                                           | -1.04                                                                                                                                | 0.000753253  | Down               | 5.67E-05    | Pitpnm3       | PITPNM family member 3                                                              |
| 75530     | 90.48                                      | 43.91                                                                                           | -1.04                                                                                                                                | 2.98E-05     | Down               | 1.65E-06    | Lyrm7         | LYR motif containing 7                                                              |
| 73873     | 33.14                                      | 16.04                                                                                           | -1.05                                                                                                                                | 0.014350487  | Down               | 0.001609849 | Fam161a       | family with sequence similarity 161, member A                                       |
| 56077     | 65.22                                      | 31.56                                                                                           | -1.05                                                                                                                                | 0.00042754   | Down               | 3.04E-05    | Dgke          | diacylglycerol kinase, epsilon                                                      |
| 100736249 | 34.49                                      | 16.59                                                                                           | -1.06                                                                                                                                | 0.009667684  | Down               | 0.001026011 | Mira          | mistral long non-coding RNA                                                         |
| 72500     | 41.31                                      | 19.86                                                                                           | -1.06                                                                                                                                | 0.007330324  | Down               | 0.000735272 | Ier5l         | immediate early response 5-like                                                     |
| 434223    | 30.70                                      | 14.75                                                                                           | -1.06                                                                                                                                | 0.015094116  | Down               | 0.001719374 | Gm1966        | predicted gene 1966                                                                 |
| 57738     | 57.84                                      | 27.72                                                                                           | -1.06                                                                                                                                | 0.000616993  | Down               | 4.54E-05    | Slc15a2       | solute carrier family 15 (H+/peptide transporter), member 2                         |
| 72121     | 23.45                                      | 11.23                                                                                           | -1.06                                                                                                                                | 0.035230804  | Down               | 0.004723978 | Dennd2d       | DENN/MADD domain containing 2D                                                      |
| 15439     | 380.36                                     | 181.75                                                                                          | -1.07                                                                                                                                | 7.28E-18     | Down               | 1.25E-19    | Hp            | haptoglobin                                                                         |
| 100038347 | 22.52                                      | 10.72                                                                                           | -1.07                                                                                                                                | 0.048197889  | Down               | 0.006937806 | Fam174b       | family with sequence similarity 174, member B                                       |
| 16855     | 75.09                                      | 35.69                                                                                           | -1.07                                                                                                                                | 6.90E-05     | Down               | 4.10E-06    | Lgals4        | lectin, galactose binding, soluble 4                                                |
| 20519     | 39.01                                      | 18.52                                                                                           | -1.07                                                                                                                                | 0.004814888  | Down               | 0.000456036 | Slc22a3       | solute carrier family 22 (organic cation transporter), member 3                     |
| 56405     | 67.24                                      | 31.89                                                                                           | -1.08                                                                                                                                | 0.000237887  | Down               | 1.60E-05    | Dusp14        | dual specificity phosphatase 14                                                     |
| 100182    | 70.85                                      | 33.58                                                                                           | -1.08                                                                                                                                | 0.000213193  | Down               | 1.42E-05    | Akna          | AT-hook transcription factor                                                        |
| 494504    | 116.61                                     | 55.23                                                                                           | -1.08                                                                                                                                | 2.51E-07     | Down               | 1.04E-08    | Apcdd1        | adenomatosis polyposis coli down-regulated 1                                        |
| 207911    | 32.09                                      | 15.19                                                                                           | -1.08                                                                                                                                | 0.01647621   | Down               | 0.001907256 | Mchr1         | melanin-concentrating hormone receptor 1                                            |
| 320092    | 172.83                                     | 81.84                                                                                           | -1.08                                                                                                                                | 2.95E-10     | Down               | 8.83E-12    | E030003E18Rik | RIKEN cDNA E030003E18 gene                                                          |
| 56222     | 244.73                                     | 115.71                                                                                          | -1.08                                                                                                                                | 1.43E-14     | Down               | 2.95E-16    | Cited4        | Cbp/p300-interacting transactivator, with Glu/Asp-rich carboxy-terminal domain, 4   |
| 545030    | 43.19                                      | 20.42                                                                                           | -1.08                                                                                                                                | 0.002603532  | Down               | 0.000226029 | Wdfy4         | WD repeat and FYVE domain containing 4                                              |
| 56437     | 33.92                                      | 16.01                                                                                           | -1.08                                                                                                                                | 0.010590789  | Down               | 0.001132525 | Rrad          | Ras-related associated with diabetes                                                |
| 12984     | 80.44                                      | 37.96                                                                                           | -1.08                                                                                                                                | 3.65E-05     | Down               | 2.06E-06    | Csf2rb2       | colony stimulating factor 2 receptor, beta 2, low-affinity (granulocyte-macrophage) |
| 26411     | 22.00                                      | 10.36                                                                                           | -1.09                                                                                                                                | 0.042617907  | Down               | 0.005942971 | Map4k1        | mitogen-activated protein kinase kinase kinase 1                                    |
| 21689     | 25.33                                      | 11.91                                                                                           | -1.09                                                                                                                                | 0.02393654   | Down               | 0.002965333 | Tekt1         | tektin 1                                                                            |
| 12364     | 212.29                                     | 99.60                                                                                           | -1.09                                                                                                                                | 9.59E-13     | Down               | 2.33E-14    | Casp12        | caspase 12                                                                          |
| 319162    | 156.31                                     | 73.30                                                                                           | -1.09                                                                                                                                | 8.34E-10     | Down               | 2.65E-11    | Hist3h2a      | histone cluster 3, H2a                                                              |
| 93712     | 22.15                                      | 10.37                                                                                           | -1.09                                                                                                                                | 0.039156444  | Down               | 0.00537676  | Pcdhga4       | protocadherin gamma subfamily A, 4                                                  |
| 15203     | 54.09                                      | 25.30                                                                                           | -1.10                                                                                                                                | 0.000796499  | Down               | 6.04E-05    | Heph          | hephaestin                                                                          |
| 100043102 | 35.68                                      | 16.65                                                                                           | -1.10                                                                                                                                | 0.007543005  | Down               | 0.000760953 | 4632428C04Rik | RIKEN cDNA 4632428C04 gene                                                          |
| 76933     | 361.80                                     | 168.46                                                                                          | -1.10                                                                                                                                | 5.68E-18     | Down               | 9.62E-20    | Ilf12l2a      | interferon, alpha-inducible protein 27 like 2A                                      |
| 13483     | 24.22                                      | 11.26                                                                                           | -1.10                                                                                                                                | 0.027488438  | Down               | 0.003497261 | Dpp6          | dipeptidylpeptidase 6                                                               |
| 53374     | 23.80                                      | 10.96                                                                                           | -1.12                                                                                                                                | 0.024377149  | Down               | 0.003038185 | Chst3         | carbohydrate (chondroitin 6/keratan) sulfotransferase 3                             |
| 353211    | 85.20                                      | 39.13                                                                                           | -1.12                                                                                                                                | 6.10E-06     | Down               | 3.02E-07    | Prune2        | prune homolog 2 (Drosophila)                                                        |
| 19227     | 23.23                                      | 10.66                                                                                           | -1.12                                                                                                                                | 0.024284779  | Down               | 0.003025273 | Pthlh         | parathyroid hormone-like peptide                                                    |
| 53886     | 86.47                                      | 39.58                                                                                           | -1.13                                                                                                                                | 1.18E-05     | Down               | 6.06E-07    | Cdkl2         | cyclin-dependent kinase-like 2 (CDC2-related kinase)                                |
| 19662     | 106.60                                     | 48.79                                                                                           | -1.13                                                                                                                                | 4.54E-07     | Down               | 1.94E-08    | Rbp4          | retinol binding protein 4, plasma                                                   |
| 243529    | 19.29                                      | 8.80                                                                                            | -1.13                                                                                                                                | 0.045199729  | Down               | 0.006399408 | H1fx          | H1 histone family, member X                                                         |
| 100702    | 247.50                                     | 112.52                                                                                          | -1.14                                                                                                                                | 4.85E-13     | Down               | 1.15E-14    | Gbp6          | guanylate binding protein 6                                                         |
| 74685     | 25.02                                      | 11.35                                                                                           | -1.14                                                                                                                                | 0.020113771  | Down               | 0.002407113 | 4930451C15Rik | RIKEN cDNA 4930451C15 gene                                                          |
| 15483     | 129.04                                     | 58.52                                                                                           | -1.14                                                                                                                                | 7.80E-09     | Down               | 2.77E-10    | Hsd11b1       | hydroxysteroid 11-beta dehydrogenase 1                                              |
| 244757    | 174.63                                     | 78.89                                                                                           | -1.15                                                                                                                                | 6.12E-10     | Down               | 1.91E-11    | Glb1l2        | galactosidase, beta 1-like 2                                                        |
| 12561     | 314.34                                     | 141.91                                                                                          | -1.15                                                                                                                                | 6.22E-20     | Down               | 9.71E-22    | Cdh4          | cadherin 4                                                                          |
| 78255     | 40.68                                      | 18.32                                                                                           | -1.15                                                                                                                                | 0.00229141   | Down               | 0.000195101 | Ralgps2       | Ral GEF with PH domain and SH3 binding motif 2                                      |
| 17927     | 150.51                                     | 67.66                                                                                           | -1.15                                                                                                                                | 3.50E-10     | Down               | 1.05E-11    | Myod1         | myogenic differentiation 1                                                          |
| 59126     | 226.69                                     | 101.88                                                                                          | -1.15                                                                                                                                | 1.13E-14     | Down               | 2.33E-16    | Nek6          | NIMA (never in mitosis gene a)-related expressed kinase 6                           |
| 23880     | 23.84                                      | 10.69                                                                                           | -1.16                                                                                                                                | 0.020113771  | Down               | 0.002406876 | Fyb           | FYN binding protein                                                                 |



|           |          |         |       |             |      |             |               |                                                                                 |
|-----------|----------|---------|-------|-------------|------|-------------|---------------|---------------------------------------------------------------------------------|
| 18782     | 39.57    | 17.71   | -1.16 | 0.003956381 | Down | 0.000361267 | Pla2g2d       | phospholipase A2, group IID                                                     |
| 16421     | 45.72    | 20.39   | -1.17 | 0.00293865  | Down | 0.000259016 | Itgb7         | integrin beta 7                                                                 |
| 56013     | 46.11    | 20.48   | -1.17 | 0.000815832 | Down | 6.21E-05    | Srcin1        | SRC kinase signaling inhibitor 1                                                |
| 26878     | 178.92   | 79.16   | -1.18 | 2.34E-12    | Down | 5.85E-14    | B3gal2        | UDP-Gal:betaGlcNAc beta 1,3-galactosyltransferase, polypeptide 2                |
| 20719     | 2871.75  | 1264.10 | -1.18 | 3.60E-151   | Down | 4.15E-154   | Serpinb6a     | serine (or cysteine) peptidase inhibitor, clade B, member 6a                    |
| 21743     | 196.76   | 86.42   | -1.19 | 9.15E-14    | Down | 2.03E-15    | lnmt          | indolethylamine N-methyltransferase                                             |
| 229706    | 22.22    | 9.75    | -1.19 | 0.021932476 | Down | 0.002667754 | Slc6a17       | solute carrier family 6 (neurotransmitter transporter), member 17               |
| 22095     | 55.00    | 24.07   | -1.19 | 0.000309408 | Down | 2.14E-05    | Tshr          | thyroid stimulating hormone receptor                                            |
| 60510     | 18.84    | 8.21    | -1.20 | 0.030759839 | Down | 0.00400213  | Syt9          | synaptotagmin IX                                                                |
| 22041     | 1771.80  | 770.01  | -1.20 | 2.17E-96    | Down | 5.01E-99    | Trf           | transferrin                                                                     |
| 19229     | 60.69    | 26.22   | -1.21 | 4.84E-05    | Down | 2.80E-06    | Ptk2b         | PTK2 protein tyrosine kinase 2 beta                                             |
| 15242     | 21.20    | 9.16    | -1.21 | 0.022606778 | Down | 0.002773935 | Hhex          | hematopoietically expressed homeobox                                            |
| 18619     | 93.78    | 40.47   | -1.21 | 5.68E-07    | Down | 2.46E-08    | Penk          | preproenkephalin                                                                |
| 14680     | 53.54    | 23.04   | -1.22 | 0.000133592 | Down | 8.45E-06    | Gnal          | guanine nucleotide binding protein, alpha stimulating, olfactory type           |
| 18979     | 27.05    | 11.63   | -1.22 | 0.008106888 | Down | 0.00082812  | Pon1          | paraoxonase 1                                                                   |
| 433294    | 875.74   | 372.46  | -1.23 | 1.07E-57    | Down | 4.92E-60    | Mettl21c      | methyltransferase like 21C                                                      |
| 12029     | 310.09   | 131.22  | -1.24 | 5.28E-22    | Down | 7.31E-24    | Bcl6b         | B cell CLL/lymphoma 6, member B                                                 |
| 237858    | 176.75   | 74.45   | -1.25 | 4.59E-13    | Down | 1.08E-14    | Tusc5         | tumor suppressor candidate 5                                                    |
| 66487     | 33.81    | 14.21   | -1.25 | 0.002143438 | Down | 0.000180401 | Smim4         | small integral membrane protein 4                                               |
| 16918     | 24.00    | 10.07   | -1.25 | 0.0093241   | Down | 0.000984172 | Mycl1         | v-myc myelocytomatosis viral oncogene homolog 1, lung carcinoma derived (avian) |
| 12481     | 16.73    | 6.94    | -1.27 | 0.027710593 | Down | 0.003533512 | Cd2           | CD2 antigen                                                                     |
| 20249     | 13296.44 | 5500.11 | -1.27 | 0           | Down | 0           | Scd1          | stearoyl-Coenzyme A desaturase 1                                                |
| 12741     | 165.10   | 68.06   | -1.28 | 7.32E-13    | Down | 1.76E-14    | Cldn5         | claudin 5                                                                       |
| 665574    | 34.76    | 14.31   | -1.28 | 0.001905888 | Down | 0.00015843  | Gm7694        | predicted gene 7694                                                             |
| 21990     | 32.53    | 13.38   | -1.28 | 0.002576136 | Down | 0.000223353 | Tph1          | tryptophan hydroxylase 1                                                        |
| 83429     | 78.25    | 32.03   | -1.29 | 2.74E-06    | Down | 1.30E-07    | Ctns          | cystinosis, nephropathic                                                        |
| 69894     | 13.99    | 5.72    | -1.29 | 0.041420102 | Down | 0.005747287 | 2010107G23Rik | RIKEN cDNA 2010107G23 gene                                                      |
| 12493     | 39.56    | 16.15   | -1.29 | 0.000532027 | Down | 3.87E-05    | Cd37          | CD37 antigen                                                                    |
| 19264     | 105.65   | 43.10   | -1.29 | 7.59E-09    | Down | 2.69E-10    | Ptpnc         | protein tyrosine phosphatase, receptor type, C                                  |
| 109663    | 52.22    | 21.26   | -1.30 | 7.02E-05    | Down | 4.19E-06    | Hoxc11        | homeobox C11                                                                    |
| 58178     | 38.12    | 15.50   | -1.30 | 0.000793868 | Down | 6.01E-05    | Sorcs1        | VPS10 domain receptor protein SORCS 1                                           |
| 320139    | 14.07    | 5.69    | -1.31 | 0.033788548 | Down | 0.004478    | Ptpn7         | protein tyrosine phosphatase, non-receptor type 7                               |
| 11752     | 25.00    | 10.02   | -1.32 | 0.013113252 | Down | 0.001454424 | Anxa8         | annexin A8                                                                      |
| 224674    | 18.16    | 7.26    | -1.32 | 0.015696413 | Down | 0.001802459 | Slc37a1       | solute carrier family 37 (glycerol-3-phosphate transporter), member 1           |
| 18574     | 21.07    | 8.23    | -1.36 | 0.008126717 | Down | 0.000831083 | Pde1b         | phosphodiesterase 1B, Ca2+-calmodulin dependent                                 |
| 216892    | 1525.35  | 595.23  | -1.36 | 1.13E-107   | Down | 2.35E-110   | Spns2         | spinster homolog 2                                                              |
| 57890     | 20.64    | 8.06    | -1.36 | 0.013385463 | Down | 0.001486931 | Il17re        | interleukin 17 receptor E                                                       |
| 216148    | 125.97   | 49.11   | -1.36 | 1.13E-10    | Down | 3.21E-12    | Shc2          | SHC (Src homology 2 domain containing) transforming protein 2                   |
| 668218    | 11.70    | 4.48    | -1.38 | 0.034671907 | Down | 0.004631049 | Bin2          | bridging integrator 2                                                           |
| 18753     | 207.42   | 78.76   | -1.40 | 6.78E-18    | Down | 1.16E-19    | Prkcd         | protein kinase C, delta                                                         |
| 15117     | 15.99    | 6.06    | -1.40 | 0.015804421 | Down | 0.001817595 | Has2          | hyaluronan synthase 2                                                           |
| 433426    | 15.32    | 5.79    | -1.40 | 0.01944444  | Down | 0.002305714 | Gm13490       | predicted gene 13490                                                            |
| 272428    | 11.98    | 4.51    | -1.41 | 0.032349798 | Down | 0.00425562  | Acsm5         | acyl-CoA synthetase medium-chain family member 5                                |
| 15000     | 11.32    | 4.21    | -1.43 | 0.032287586 | Down | 0.004243843 | H2-DMb2       | histocompatibility 2, class II, locus Mb2                                       |
| 234564    | 135.73   | 50.45   | -1.43 | 1.94E-12    | Down | 4.84E-14    | Ces1f         | carboxylesterase 1F                                                             |
| 69206     | 12.50    | 4.57    | -1.45 | 0.025141047 | Down | 0.003153682 | 2010016118Rik | RIKEN cDNA 2010016118 gene                                                      |
| 110168    | 7.28     | 2.63    | -1.47 | 0.048678784 | Down | 0.007032284 | Gpr18         | G protein-coupled receptor 18                                                   |
| 72203     | 269.30   | 96.80   | -1.48 | 7.76E-22    | Down | 1.10E-23    | 2610507101Rik | RIKEN cDNA 2610507101 gene                                                      |
| 74843     | 842.46   | 299.51  | -1.49 | 9.31E-77    | Down | 3.27E-79    | Mss51         | MSS51 mitochondrial translational activator                                     |
| 23833     | 62.25    | 22.02   | -1.50 | 1.18E-06    | Down | 5.35E-08    | Cd52          | CD52 antigen                                                                    |
| 69564     | 937.10   | 330.85  | -1.50 | 5.50E-85    | Down | 1.49E-87    | Nmrk2         | nicotinamide riboside kinase 2                                                  |
| 171207    | 38.04    | 13.42   | -1.50 | 8.76E-05    | Down | 5.37E-06    | Arhgap4       | Rho GTPase activating protein 4                                                 |
| 74521     | 6.49     | 2.29    | -1.50 | 0.045743073 | Down | 0.006492157 | Ppp4r4        | protein phosphatase 4, regulatory subunit 4                                     |
| 14573     | 9.43     | 3.32    | -1.51 | 0.031822428 | Down | 0.004169734 | Gdnf          | glial cell line derived neurotrophic factor                                     |
| 94229     | 16.02    | 5.62    | -1.51 | 0.011638142 | Down | 0.001264651 | Slc4a10       | solute carrier family 4, sodium bicarbonate cotransporter-like, member 10       |
| 16875     | 4.84     | 1.68    | -1.52 | 0.049209586 | Down | 0.007117476 | Lhx8          | LIM homeobox protein 8                                                          |
| 100041546 | 7.61     | 2.64    | -1.53 | 0.036367839 | Down | 0.00491208  | Ly6c2         | lymphocyte antigen 6 complex, locus C2                                          |
| 18419     | 10.36    | 3.59    | -1.53 | 0.022465179 | Down | 0.002749385 | Otog          | otogelin                                                                        |
| 74734     | 9.56     | 3.31    | -1.53 | 0.027635113 | Down | 0.003522294 | Rhoh          | ras homolog gene family, member H                                               |
| 114654    | 3.92     | 1.36    | -1.53 | 0.047498951 | Down | 0.006809817 | Ly6g6d        | lymphocyte antigen 6 complex, locus G6D                                         |
| 16373     | 82.41    | 28.40   | -1.54 | 7.15E-09    | Down | 2.51E-10    | Irx3          | Iroquois related homeobox 3 (Drosophila)                                        |
| 98256     | 8.56     | 2.95    | -1.54 | 0.029608673 | Down | 0.003816114 | Kmo           | kynurenine 3-monooxygenase (kynurenine 3-hydroxylase)                           |
| 16470     | 5.92     | 2.03    | -1.55 | 0.041391666 | Down | 0.005740955 | Ush1g         | Usher syndrome 1G                                                               |

|           |         |         |       |             |      |             |               |                                                               |
|-----------|---------|---------|-------|-------------|------|-------------|---------------|---------------------------------------------------------------|
| 71233     | 4.24    | 1.45    | -1.55 | 0.044102685 | Down | 0.006211037 | Enkur         | enkurin, TRPC channel interacting protein                     |
| 21897     | 10.70   | 3.65    | -1.55 | 0.020487669 | Down | 0.002466032 | Tlr1          | toll-like receptor 1                                          |
| 20715     | 7.98    | 2.71    | -1.56 | 0.031614503 | Down | 0.004129229 | Serpina3g     | serine (or cysteine) peptidase inhibitor, clade A, member 3G  |
| 13419     | 10.89   | 3.69    | -1.56 | 0.019861489 | Down | 0.002367762 | Dnase1        | deoxyribonuclease I                                           |
| 19428     | 9.74    | 3.29    | -1.56 | 0.021323095 | Down | 0.00258134  | Rasl2-9       | RAS-like, family 2, locus 9                                   |
| 108811    | 31.53   | 10.63   | -1.57 | 0.000224143 | Down | 1.50E-05    | Ccdc122       | coiled-coil domain containing 122                             |
| 14545     | 305.41  | 102.81  | -1.57 | 5.94E-31    | Down | 5.79E-33    | Gdap1         | ganglioside-induced differentiation-associated-protein 1      |
| 239845    | 4.23    | 1.42    | -1.57 | 0.04014227  | Down | 0.005542211 | Gpr156        | G protein-coupled receptor 156                                |
| 18263     | 2798.56 | 938.61  | -1.58 | 9.18E-238   | Down | 7.94E-241   | Odc1          | ornithine decarboxylase, structural 1                         |
| 16842     | 10.15   | 3.38    | -1.58 | 0.021194442 | Down | 0.0025621   | Lef1          | lymphoid enhancer binding factor 1                            |
| 320469    | 14.64   | 4.87    | -1.59 | 0.007438752 | Down | 0.000748292 | 9930014A18Rik | RIKEN cDNA 9930014A18 gene                                    |
| 84112     | 18.67   | 6.21    | -1.59 | 0.004034632 | Down | 0.000370506 | Sucnr1        | succinate receptor 1                                          |
| 226123    | 56.68   | 18.83   | -1.59 | 7.95E-07    | Down | 3.48E-08    | Morn4         | MORN repeat containing 4                                      |
| 78473     | 5.20    | 1.73    | -1.59 | 0.036507358 | Down | 0.004937238 | Skap1         | src family associated phosphoprotein 1                        |
| 19354     | 89.28   | 29.62   | -1.59 | 2.60E-10    | Down | 7.76E-12    | Rac2          | RAS-related C3 botulinum substrate 2                          |
| 12501     | 5.18    | 1.69    | -1.61 | 0.032287586 | Down | 0.004245575 | Cd3e          | CD3 antigen, epsilon polypeptide                              |
| 170706    | 135.45  | 44.21   | -1.62 | 3.95E-15    | Down | 7.94E-17    | Tmem37        | transmembrane protein 37                                      |
| 15001     | 6.30    | 2.05    | -1.62 | 0.02907217  | Down | 0.003730596 | H2-Oa         | histocompatibility 2, O region alpha locus                    |
| 18111     | 228.50  | 74.11   | -1.62 | 6.40E-24    | Down | 8.26E-26    | Nnat          | neuronatin                                                    |
| 320174    | 4.36    | 1.41    | -1.63 | 0.030902724 | Down | 0.004022503 | A830082K12Rik | RIKEN cDNA A830082K12 gene                                    |
| 108670    | 29.40   | 9.47    | -1.63 | 0.00030237  | Down | 2.09E-05    | Epsti1        | epithelial stromal interaction 1 (breast)                     |
| 215632    | 15.31   | 4.92    | -1.64 | 0.005056659 | Down | 0.000482142 | Psd4          | pleckstrin and Sec7 domain containing 4                       |
| 16516     | 31.23   | 9.98    | -1.65 | 0.000115755 | Down | 7.23E-06    | Kcnj15        | potassium inwardly-rectifying channel, subfamily J, member 15 |
| 81600     | 16.71   | 5.29    | -1.66 | 0.003683463 | Down | 0.000335073 | Chia          | chitinase, acidic                                             |
| 242248    | 23.96   | 7.50    | -1.68 | 0.000531968 | Down | 3.87E-05    | Bank1         | B cell scaffold protein with ankyrin repeats 1                |
| 12504     | 23.93   | 7.45    | -1.68 | 0.000404424 | Down | 2.87E-05    | Cd4           | CD4 antigen                                                   |
| 71206     | 15.90   | 4.94    | -1.68 | 0.003215829 | Down | 0.000285489 | Katnal2       | katanin p60 subunit A-like 2                                  |
| 70192     | 16.17   | 4.99    | -1.70 | 0.003404782 | Down | 0.000306359 | Cd209g        | CD209g antigen                                                |
| 72891     | 3.76    | 1.16    | -1.70 | 0.020672101 | Down | 0.002491806 | Xlr4c         | X-linked lymphocyte-regulated 4C                              |
| 16408     | 39.89   | 12.27   | -1.70 | 1.16E-05    | Down | 5.98E-07    | Itgal         | integrin alpha L                                              |
| 232941    | 6.88    | 2.08    | -1.72 | 0.016326117 | Down | 0.001885122 | Ppm1n         | protein phosphatase, Mg2+/Mn2+ dependent, 1N (putative)       |
| 238988    | 4.73    | 1.43    | -1.73 | 0.01978356  | Down | 0.002357331 | Erc2          | ELKS/RAB6-interacting/CAST family member 2                    |
| 20849     | 10.19   | 3.07    | -1.73 | 0.009203705 | Down | 0.000966306 | Stat4         | signal transducer and activator of transcription 4            |
| 74131     | 30.31   | 9.13    | -1.73 | 7.82E-05    | Down | 4.70E-06    | Sash3         | SAM and SH3 domain containing 3                               |
| 13107     | 188.66  | 56.37   | -1.74 | 7.06E-23    | Down | 9.52E-25    | Cyp2f2        | cytochrome P450, family 2, subfamily f, polypeptide 2         |
| 192188    | 303.72  | 90.17   | -1.75 | 3.91E-37    | Down | 3.02E-39    | Stab2         | stabilin 2                                                    |
| 14025     | 8.17    | 2.42    | -1.76 | 0.011338822 | Down | 0.00122485  | Bcl11a        | B cell CLL/lymphoma 11A (zinc finger protein)                 |
| 100502636 | 16.20   | 4.75    | -1.77 | 0.002467516 | Down | 0.000212656 | Gm19299       | predicted gene, 19299                                         |
| 12409     | 456.11  | 132.19  | -1.79 | 2.42E-47    | Down | 1.37E-49    | Cbr2          | carbonyl reductase 2                                          |
| 16069     | 24.83   | 7.19    | -1.79 | 0.000155872 | Down | 1.00E-05    | IgJ           | immunoglobulin joining chain                                  |
| 64380     | 6.42    | 1.84    | -1.81 | 0.011924168 | Down | 0.00130398  | Ms4a4c        | membrane-spanning 4-domains, subfamily A, member 4C           |
| 20304     | 13.29   | 3.78    | -1.82 | 0.003148062 | Down | 0.000278747 | Ccl5          | chemokine (C-C motif) ligand 5                                |
| 228608    | 4305.40 | 1218.21 | -1.82 | 0           | Down | 0           | Smox          | spermine oxidase                                              |
| 236312    | 22.10   | 6.25    | -1.82 | 0.000233876 | Down | 1.57E-05    | Pyhin1        | pyrin and HIN domain family, member 1                         |
| 229011    | 82.00   | 23.07   | -1.83 | 8.44E-12    | Down | 2.18E-13    | Samd10        | sterile alpha motif domain containing 10                      |
| 320495    | 6.68    | 1.84    | -1.86 | 0.008787487 | Down | 0.000914361 | Ipcef1        | interaction protein for cytohesin exchange factors 1          |
| 12526     | 5.49    | 1.51    | -1.86 | 0.009520983 | Down | 0.001008795 | Cd8b1         | CD8 antigen, beta chain 1                                     |
| 73748     | 178.68  | 49.06   | -1.86 | 2.21E-24    | Down | 2.78E-26    | Gadl1         | glutamate decarboxylase-like 1                                |
| 233079    | 40.45   | 11.06   | -1.87 | 9.92E-07    | Down | 4.42E-08    | Ffar2         | free fatty acid receptor 2                                    |
| 18197     | 5.49    | 1.50    | -1.87 | 0.00902714  | Down | 0.000944753 | Nsg2          | neuron specific gene family member 2                          |
| 54204     | 24.45   | 6.66    | -1.88 | 0.000114569 | Down | 7.15E-06    | 1-Sep         | septin 1                                                      |
| 22778     | 40.93   | 11.08   | -1.89 | 7.88E-07    | Down | 3.44E-08    | Ikzf1         | IKAROS family zinc finger 1                                   |
| 16565     | 44.52   | 11.99   | -1.89 | 1.99E-07    | Down | 8.16E-09    | Kif21b        | kinesin family member 21B                                     |
| 12502     | 6.95    | 1.86    | -1.90 | 0.006634121 | Down | 0.000657025 | Cd3g          | CD3 antigen, gamma polypeptide                                |
| 69165     | 51.15   | 13.62   | -1.91 | 2.24E-08    | Down | 8.41E-10    | Cd209b        | CD209b antigen                                                |
| 98752     | 8.38    | 2.21    | -1.92 | 0.005037231 | Down | 0.000479999 | Fcrla         | Fc receptor-like A                                            |
| 66755     | 30.40   | 7.99    | -1.93 | 1.79E-05    | Down | 9.51E-07    | 4933415F23Rik | RIKEN cDNA 4933415F23 gene                                    |
| 666661    | 5.89    | 1.55    | -1.93 | 0.006519785 | Down | 0.000644199 | Gm8221        | apolipoprotein L 7c pseudogene                                |
| 78334     | 624.32  | 162.70  | -1.94 | 5.87E-77    | Down | 2.03E-79    | Cdk19         | cyclin-dependent kinase 19                                    |
| 13421     | 9.19    | 2.39    | -1.94 | 0.004760495 | Down | 0.000449787 | Dnase113      | deoxyribonuclease 1-like 3                                    |
| 54352     | 81.82   | 21.24   | -1.95 | 9.17E-13    | Down | 2.22E-14    | Irx5          | Iroquois related homeobox 5 (Drosophila)                      |
| 12721     | 112.88  | 29.12   | -1.95 | 1.35E-16    | Down | 2.49E-18    | Coro1a        | coronin, actin binding protein 1A                             |
| 276891    | 23.55   | 6.05    | -1.96 | 7.02E-05    | Down | 4.19E-06    | Timd4         | T cell immunoglobulin and mucin domain containing 4           |

|           |          |         |       |             |      |             |               |                                                                                     |
|-----------|----------|---------|-------|-------------|------|-------------|---------------|-------------------------------------------------------------------------------------|
| 80901     | 4.71     | 1.20    | -1.98 | 0.005098634 | Down | 0.000487026 | Cxcr6         | chemokine (C-X-C motif) receptor 6                                                  |
| 24047     | 27.59    | 6.99    | -1.98 | 1.68E-05    | Down | 8.84E-07    | Ccl19         | chemokine (C-C motif) ligand 19                                                     |
| 328833    | 7.61     | 1.89    | -2.01 | 0.00337569  | Down | 0.000303184 | Trem12        | triggering receptor expressed on myeloid cells-like 2                               |
| 666348    | 5.02     | 1.22    | -2.04 | 0.003661804 | Down | 0.000332666 | Apol7e        | apolipoprotein L 7e                                                                 |
| 78826     | 13.07    | 3.19    | -2.04 | 0.000781145 | Down | 5.90E-05    | P2ry10        | purinergic receptor P2Y, G-protein coupled 10                                       |
| 16797     | 9.33     | 2.26    | -2.04 | 0.002136502 | Down | 0.000179571 | Lat           | linker for activation of T cells                                                    |
| 14663     | 5.16     | 1.25    | -2.05 | 0.003407462 | Down | 0.000306823 | Glycam1       | glycosylation dependent cell adhesion molecule 1                                    |
| 243958    | 17.29    | 4.18    | -2.05 | 0.000254453 | Down | 1.72E-05    | Siglecg       | sialic acid binding Ig-like lectin G                                                |
| 84544     | 5.07     | 1.22    | -2.05 | 0.003370323 | Down | 0.000302507 | Cd96          | CD96 antigen                                                                        |
| 276950    | 19.99    | 4.79    | -2.06 | 8.74E-05    | Down | 5.35E-06    | Sifn8         | schlafen 8                                                                          |
| 232174    | 100.74   | 23.88   | -2.08 | 1.31E-15    | Down | 2.58E-17    | Cyp28b1       | cytochrome P450, family 26, subfamily b, polypeptide 1                              |
| 381836    | 740.60   | 174.22  | -2.09 | 1.31E-102   | Down | 2.94E-105   | Sbk2          | SH3-binding domain kinase family, member 2                                          |
| 19419     | 15.77    | 3.69    | -2.10 | 0.000400989 | Down | 2.84E-05    | Rasgrp1       | RAS guanyl releasing protein 1                                                      |
| 626578    | 94.30    | 21.69   | -2.12 | 3.42E-15    | Down | 6.84E-17    | Gbp10         | guanylate-binding protein 10                                                        |
| 67888     | 321.46   | 73.84   | -2.12 | 4.18E-49    | Down | 2.29E-51    | Tmem100       | transmembrane protein 100                                                           |
| 14859     | 48.92    | 11.21   | -2.13 | 5.97E-09    | Down | 2.08E-10    | Gsta3         | glutathione S-transferase, alpha 3                                                  |
| 12775     | 18.80    | 4.22    | -2.15 | 8.23E-05    | Down | 4.99E-06    | Ccr7          | chemokine (C-C motif) receptor 7                                                    |
| 21940     | 16.07    | 3.54    | -2.18 | 0.000119159 | Down | 7.45E-06    | Cd27          | CD27 antigen                                                                        |
| 234695    | 12.32    | 2.64    | -2.22 | 0.000321268 | Down | 2.23E-05    | Rltpr         | RGD motif, leucine rich repeats, tropomodulin domain and proline-rich containing    |
| 330723    | 187.38   | 39.78   | -2.24 | 1.17E-29    | Down | 1.20E-31    | Htra4         | HtrA serine peptidase 4                                                             |
| 27371     | 7.85     | 1.66    | -2.24 | 0.000854573 | Down | 6.54E-05    | Sh2d2a        | SH2 domain protein 2A                                                               |
| 217682    | 13.89    | 2.93    | -2.24 | 0.000163673 | Down | 1.06E-05    | Plekhd1       | pleckstrin homology domain containing, family D (with coiled-coil domains) member 1 |
| 81879     | 152.75   | 31.69   | -2.27 | 8.95E-23    | Down | 1.21E-24    | Tfcp2l1       | transcription factor CP2-like 1                                                     |
| 21414     | 37.68    | 7.79    | -2.27 | 4.47E-08    | Down | 1.72E-09    | Tcf7          | transcription factor 7, T cell specific                                             |
| 320484    | 28.35    | 5.82    | -2.28 | 8.04E-07    | Down | 3.52E-08    | Rasal3        | RAS protein activator like 3                                                        |
| 60361     | 14.50    | 2.97    | -2.29 | 0.000108489 | Down | 6.75E-06    | Ms4a4b        | membrane-spanning 4-domains, subfamily A, member 4B                                 |
| 114249    | 198.06   | 40.11   | -2.30 | 7.02E-35    | Down | 5.99E-37    | Npnt          | nephronectin                                                                        |
| 213439    | 6.94     | 1.34    | -2.37 | 0.000403289 | Down | 2.85E-05    | Gpr174        | G protein-coupled receptor 174                                                      |
| 13507     | 7.49     | 1.41    | -2.41 | 0.000285642 | Down | 1.95E-05    | Dsc3          | desmocollin 3                                                                       |
| 16428     | 12.85    | 2.40    | -2.42 | 8.06E-05    | Down | 4.86E-06    | Itk           | IL2 inducible T cell kinase                                                         |
| 18507     | 7.55     | 1.40    | -2.43 | 0.000256998 | Down | 1.75E-05    | Pax5          | paired box gene 5                                                                   |
| 381091    | 7.36     | 1.36    | -2.43 | 0.000249739 | Down | 1.69E-05    | H2-Eb2        | histocompatibility 2, class II antigen E beta2                                      |
| 100041585 | 118.70   | 21.62   | -2.46 | 4.67E-10    | Down | 1.44E-11    | Amd2          | S-adenosylmethionine decarboxylase 2                                                |
| 12507     | 7.86     | 1.42    | -2.46 | 0.000195507 | Down | 1.29E-05    | Cd5           | CD5 antigen                                                                         |
| 229499    | 7.61     | 1.38    | -2.47 | 0.000191429 | Down | 1.26E-05    | Fcrl1         | Fc receptor-like 1                                                                  |
| 55985     | 36.81    | 6.54    | -2.49 | 4.91E-09    | Down | 1.67E-10    | Cxcl13        | chemokine (C-X-C motif) ligand 13                                                   |
| 74513     | 139.81   | 24.39   | -2.52 | 2.26E-26    | Down | 2.62E-28    | Neto3         | neuropilin (NRP) and tolloid (TLL)-like 2                                           |
| 83408     | 46.78    | 8.13    | -2.52 | 6.27E-11    | Down | 1.76E-12    | Gimap3        | GTPase, IMAP family member 3                                                        |
| 18985     | 12.54    | 2.13    | -2.56 | 3.65E-05    | Down | 2.07E-06    | Pou2af1       | POU domain, class 2, associating factor 1                                           |
| 22780     | 21.83    | 3.49    | -2.65 | 9.34E-07    | Down | 4.14E-08    | Ikzf3         | IKAROS family zinc finger 3                                                         |
| 72049     | 11.60    | 1.80    | -2.69 | 1.77E-05    | Down | 9.37E-07    | Tnfrsf13c     | tumor necrosis factor receptor superfamily, member 13c                              |
| 208154    | 21.91    | 3.39    | -2.69 | 3.41E-07    | Down | 1.44E-08    | Btla          | B and T lymphocyte associated                                                       |
| 114570    | 24.06    | 3.72    | -2.69 | 1.36E-07    | Down | 5.47E-09    | Crip3         | cysteine-rich protein 3                                                             |
| 12143     | 11.72    | 1.78    | -2.71 | 1.29E-05    | Down | 6.70E-07    | Btk           | B lymphoid kinase                                                                   |
| 19265     | 16.00    | 2.44    | -2.72 | 2.89E-06    | Down | 1.38E-07    | Ptprcap       | protein tyrosine phosphatase, receptor type, C polypeptide-associated protein       |
| 216859    | 25.38    | 3.80    | -2.74 | 8.98E-08    | Down | 3.57E-09    | Acap1         | ArfGAP with coiled-coil, ankyrin repeat and PH domains 1                            |
| 15002     | 29.56    | 4.41    | -2.74 | 1.47E-08    | Down | 5.43E-10    | H2-Ob         | histocompatibility 2, O region beta locus                                           |
| 20860     | 9.95     | 1.47    | -2.76 | 1.55E-05    | Down | 8.12E-07    | Sult1e1       | sulfotransferase family 1E, member 1                                                |
| 50781     | 258.15   | 37.99   | -2.76 | 1.52E-52    | Down | 7.71E-55    | Dkk3          | dickkopf homolog 3 (Xenopus laevis)                                                 |
| 78102     | 32.25    | 4.71    | -2.78 | 2.18E-09    | Down | 7.21E-11    | 8430426J06Rik | RIKEN cDNA 8430426J06 gene                                                          |
| 16197     | 22.24    | 3.17    | -2.81 | 1.85E-07    | Down | 7.58E-09    | Il7r          | interleukin 7 receptor                                                              |
| 67425     | 22.32    | 3.15    | -2.83 | 1.38E-07    | Down | 5.59E-09    | Eps81         | EPS8-like 1                                                                         |
| 319734    | 76.19    | 10.13   | -2.91 | 7.24E-19    | Down | 1.19E-20    | Cacna2d4      | calcium channel, voltage-dependent, alpha 2/delta subunit 4                         |
| 60504     | 14.29    | 1.87    | -2.93 | 1.17E-06    | Down | 5.29E-08    | Il21r         | interleukin 21 receptor                                                             |
| 20527     | 178.37   | 22.53   | -2.99 | 4.58E-40    | Down | 3.11E-42    | Slc2a3        | solute carrier family 2 (facilitated glucose transporter), member 3                 |
| 12525     | 18.87    | 2.29    | -3.05 | 1.21E-07    | Down | 4.86E-09    | Cd8a          | CD8 antigen, alpha chain                                                            |
| 11702     | 21196.13 | 2474.73 | -3.10 | 0           | Down | 0           | Amd1          | S-adenosylmethionine decarboxylase 1                                                |
| 16818     | 22.36    | 2.61    | -3.10 | 1.74E-08    | Down | 6.48E-10    | Lck           | lymphocyte protein tyrosine kinase                                                  |
| 230810    | 208.92   | 22.99   | -3.18 | 4.06E-47    | Down | 2.32E-49    | Slc30a2       | solute carrier family 30 (zinc transporter), member 2                               |
| 15985     | 35.78    | 3.59    | -3.32 | 5.54E-12    | Down | 1.42E-13    | Cd79b         | CD79B antigen                                                                       |
| 20299     | 26.70    | 2.62    | -3.35 | 2.57E-10    | Down | 7.65E-12    | Ccl22         | chemokine (C-C motif) ligand 22                                                     |
| 12145     | 17.27    | 1.68    | -3.36 | 1.52E-08    | Down | 5.63E-10    | Cxcr5         | chemokine (C-X-C motif) receptor 5                                                  |
| 242894    | 158.47   | 15.01   | -3.40 | 1.07E-39    | Down | 7.65E-42    | Actr3b        | ARP3 actin-related protein 3B                                                       |

|        |        |       |       |          |      |          |               |                                                                                 |
|--------|--------|-------|-------|----------|------|----------|---------------|---------------------------------------------------------------------------------|
| 16994  | 38.11  | 3.57  | -3.42 | 5.07E-13 | Down | 1.21E-14 | Ltb           | lymphotoxin B                                                                   |
| 272382 | 25.78  | 2.32  | -3.47 | 1.63E-10 | Down | 4.70E-12 | Spib          | Spi-B transcription factor (Spi-1/PU.1 related)                                 |
| 69169  | 30.99  | 2.67  | -3.53 | 9.66E-12 | Down | 2.53E-13 | Faim3         | Fas apoptotic inhibitory molecule 3                                             |
| 108956 | 21.83  | 1.73  | -3.65 | 2.19E-10 | Down | 6.46E-12 | Apol7c        | apolipoprotein L 7c                                                             |
| 12902  | 21.64  | 1.71  | -3.66 | 1.88E-10 | Down | 5.46E-12 | Cr2           | complement receptor 2                                                           |
| 12478  | 30.99  | 2.37  | -3.71 | 1.82E-12 | Down | 4.51E-14 | Cd19          | CD19 antigen                                                                    |
| 20343  | 41.94  | 3.05  | -3.78 | 6.72E-15 | Down | 1.37E-16 | Sell          | selectin, lymphocyte                                                            |
| 12483  | 43.56  | 3.11  | -3.81 | 4.80E-15 | Down | 9.74E-17 | Cd22          | CD22 antigen                                                                    |
| 208151 | 95.79  | 6.28  | -3.93 | 1.87E-27 | Down | 2.10E-29 | Tmem132b      | transmembrane protein 132B                                                      |
| 12482  | 32.37  | 2.11  | -3.94 | 1.95E-13 | Down | 4.48E-15 | Ms4a1         | membrane-spanning 4-domains, subfamily A, member 1                              |
| 73598  | 270.48 | 14.59 | -4.21 | 1.29E-67 | Down | 5.12E-70 | 1700001O22Rik | RIKEN cDNA 1700001O22 gene                                                      |
| 109828 | 266.60 | 14.25 | -4.23 | 1.29E-67 | Down | 5.15E-70 | C7            | complement component 7                                                          |
| 17167  | 41.78  | 2.18  | -4.26 | 1.76E-16 | Down | 3.28E-18 | Marco         | macrophage receptor with collagenous structure                                  |
| 14128  | 36.38  | 1.87  | -4.28 | 2.42E-15 | Down | 4.79E-17 | Fcer2a        | Fc receptor, IgE, low affinity II, alpha polypeptide                            |
| 12518  | 66.90  | 3.20  | -4.39 | 6.44E-22 | Down | 8.99E-24 | Cd79a         | CD79A antigen (immunoglobulin-associated alpha)                                 |
| 277898 | 82.89  | 3.53  | -4.55 | 7.46E-26 | Down | 8.82E-28 | Slc15a5       | solute carrier family 15, member 5                                              |
| 20592  | 114.69 | 2.21  | -5.69 | 1.50E-32 | Down | 1.38E-34 | Kdm5d         | lysine (K)-specific demethylase 5D                                              |
| 22290  | 141.16 | 2.28  | -5.95 | 1.29E-36 | Down | 1.02E-38 | Uty           | ubiquitously transcribed tetratricopeptide repeat gene, Y chromosome            |
| 26908  | 398.11 | 2.67  | -7.22 | 6.46E-62 | Down | 2.83E-64 | Eif2s3y       | eukaryotic translation initiation factor 2, subunit 3, structural gene Y-linked |
| 26900  | 711.30 | 2.89  | -7.94 | 1.60E-80 | Down | 5.08E-83 | Ddx3y         | DEAD (Asp-Glu-Ala-Asp) box polypeptide 3, Y-linked                              |

## Supplemental figure legend

### Figure S1: *Ad libitum* food intake and weight gain in *Ctns*<sup>-/-</sup> mice.

WT and *Ctns*<sup>-/-</sup> mice were treated with 25(OH)D<sub>3</sub> and 1,25(OH)<sub>2</sub>D<sub>3</sub> (75 µg/kg per day and 60 ng/kg per day, respectively) or ethylene glycol as vehicle for 6 weeks. Four groups of mice were included: WT+Vehicle (n=12), WT+25(OH)D<sub>3</sub>+1,25(OH)<sub>2</sub>D<sub>3</sub> (n=12), *Ctns*<sup>-/-</sup>+Vehicle (n=12) and *Ctns*<sup>-/-</sup>+25(OH)D<sub>3</sub>+1,25(OH)<sub>2</sub>D<sub>3</sub> (n=12). Mice were fed *ad libitum* and weight gain was recorded. Data are expressed as mean ± SEM. #p<0.05, significantly different in *Ctns*<sup>-/-</sup>+Vehicle and *Ctns*<sup>-/-</sup>+25(OH)D<sub>3</sub>+1,25(OH)<sub>2</sub>D<sub>3</sub> mice versus WT+Vehicle and WT+25(OH)D<sub>3</sub>+1,25(OH)<sub>2</sub>D<sub>3</sub> mice, respectively. Results of *Ctns*<sup>-/-</sup>+Vehicle mice were also compared to *Ctns*<sup>-/-</sup>+25(OH)D<sub>3</sub>+1,25(OH)<sub>2</sub>D<sub>3</sub> mice.

Supplemental  
Figure S1

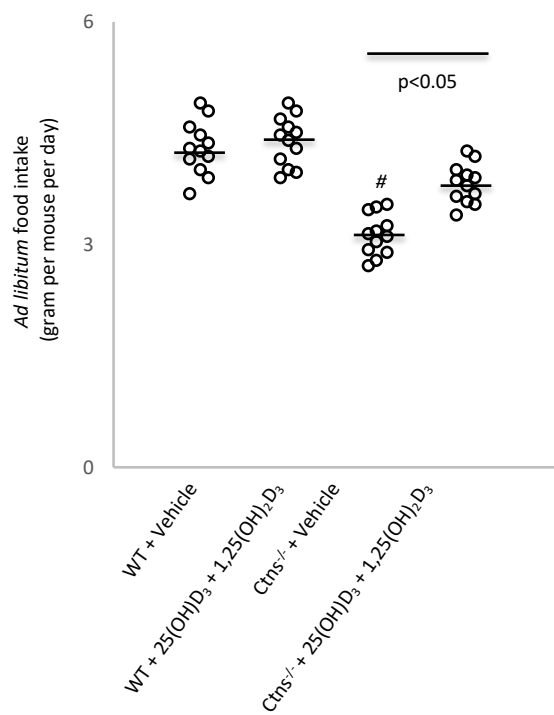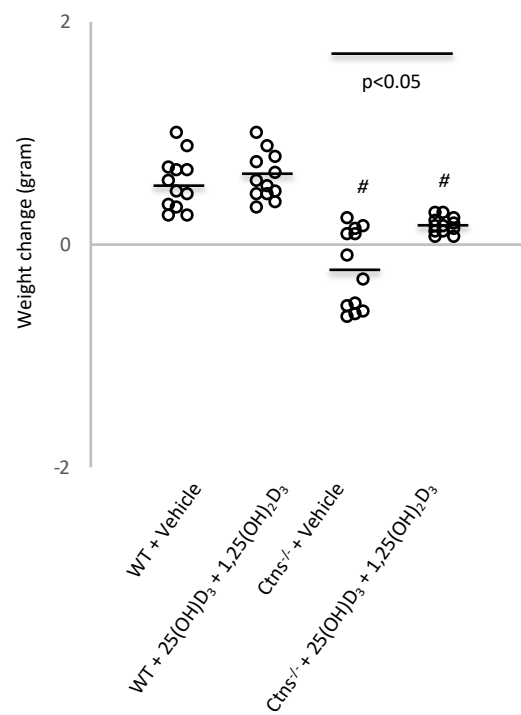

Supplement: JCSM-11-120-s001.pdf [file JCSM-11-120-s001.pdf]
